# Supplementary material for: Ir(iii)-catalyzed thioether directed arene C–H alkenylation
Source: Royal Society of Chemistry journal article supplement (doi:10.1039/c9ra06811b), 2019-01-01

## Ir(III)-Catalyzed Thioether Directed Arene C–H Alkenylation

Chen Li,<sup>a</sup> Xian Chen,<sup>a,‡</sup> Rui-Peng Bao,<sup>b,‡</sup> Dong-Li Li,<sup>a,\*</sup> Kun Zhang,<sup>a</sup> Dong-Hui Wang<sup>b,\*</sup>

<sup>a</sup> School of Biotechnology & Health Sciences, Wuyi University, 22 Dongcheng Vill., Jiangmen, Guangdong 529020, China

<sup>b</sup> CAS Key Laboratory of Synthetic and Self-Assembly Chemistry for Organic Functional Molecules; Center for Excellence in Molecular Synthesis; University of Chinese Academy of Sciences; Shanghai Institute of Organic Chemistry, CAS. 345 Lingling Rd., Shanghai 200032, China.

### Contents

|                                                                                         |             |
|-----------------------------------------------------------------------------------------|-------------|
| <b>1, General information</b>                                                           | <b>S-2</b>  |
| <b>2, Preparation and characterization of ArCH<sub>2</sub>SAr</b>                       | <b>S-2</b>  |
| <b>3, General procedure for thioether directed mono-alkenylation</b>                    | <b>S-7</b>  |
| <b>4, Characterization data for mono-alkenylation products</b>                          | <b>S-8</b>  |
| <b>5, General procedure for thioether directed mono-alkenylation of various olefins</b> | <b>S-15</b> |
| <b>6, Characterization data for mono-alkenylation products of various olefins</b>       | <b>S-15</b> |
| <b>7, General procedure for thioether directed di-alkenylation</b>                      | <b>S-19</b> |
| <b>8, Characterization data for di-alkenylation products</b>                            | <b>S-20</b> |
| <b>9, References</b>                                                                    | <b>S-24</b> |
| <b>10, <sup>1</sup>H NMR, <sup>13</sup>C NMR and <sup>19</sup>F spectra</b>             | <b>S-25</b> |

## 1, General Information:

[Cp\*IrCl<sub>2</sub>]<sub>2</sub> was purchased from Strem. The commercially available reagents were used as received without further purification. All solvents are chemical pure grade reagents, and were used without further purification. Unless stated otherwise, all reactions were performed under air atmosphere. Flash column chromatography were performed on Silica Gel 300-400 mesh. TLC plates were monitored first with UV-254 nm, and then stained with KMnO<sub>4</sub> aq. solution. <sup>1</sup>H NMR spectra were recorded at Varian AM400 400 MHz. <sup>19</sup>F NMR were recorded on a 376 MHz or 282 MHz spectrometer. <sup>13</sup>C NMR spectra were recorded on a Varian AM400 spectrometer (<sup>13</sup>C:100 MHz) and Agilent 400 (<sup>13</sup>C:100 MHz). <sup>1</sup>H NMR and <sup>13</sup>C NMR chemical shifts were determined relative to internal standard TMS at δ 0.0. The following abbreviations were used to explain multiplicities: s = singlet, d = doublet, t = triplet, q = quartet, m = multiplet, and br = broad. High resolution mass spectra were recorded at Center for Mass Spectrometry, Shanghai Institute of Organic Chemistry, Chinese Academy of Sciences.

## 2, Preparation and characterization of ArCH<sub>2</sub>SAr:

The arylthioethers were prepared according to reported procedures [1].

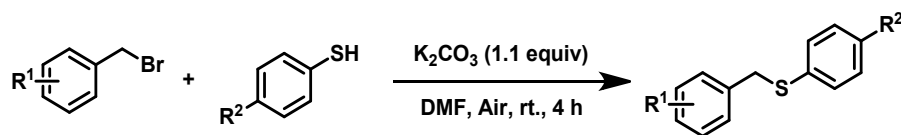

To a 100 mL round-bottomed flask that equipped with a magnetic stir bar, was charge with benzyl bromides (10.0 mmol), thiophenols (10.0 mmol) and K<sub>2</sub>CO<sub>3</sub> (11.0 mmol, 1.52 g) in DMF (10.00 mL) under air atmosphere at room temperature for 4 h. And then 15 mL of water was added to the reaction mixture. The resulting mixture was transferred to a separated funnel, ethyl acetate (200 mL) was added, the aqueous layer was sperated, the organic layer was washed in turn with water (20 mL\*3) and brine (20 mL \*2). The resulting organic layer was dried over anhydrous sodium sulfate. The solvent was removed on a rotavap under reduced pressure, the residue was subjected to flash column chromatography to obtain the desired products.

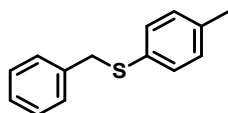

**benzyl *p*-tolyl sulfane (1a)**,<sup>[2]</sup> the title compound was achieved as a white solid, 2.1 g, 98% yield.

<sup>1</sup>H NMR (400 MHz, CDCl<sub>3</sub>, TMS) δ 7.32–7.21 (m, 7H), 7.08 (d, *J* = 8.0 Hz, 2H), 4.09 (s, 2H), 2.32 (s, 3H). <sup>13</sup>C NMR (100 MHz, CDCl<sub>3</sub>) δ 137.8, 136.6, 132.5, 130.7, 129.7, 128.9, 128.5, 127.139.8, 21.1.

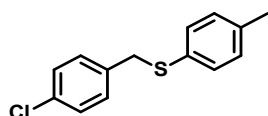

**4-chlorobenzyl *p*-tolyl sulfane (1b)**,<sup>[3]</sup> the title compound was achieved as a white solid, 2.4 g, 97% yield.

<sup>1</sup>H NMR (400 MHz, CDCl<sub>3</sub>, TMS) δ 7.26–7.17 (m, 4H), 7.16 (d, *J* = 8.4 Hz, 2H), 7.06 (d, *J* = 8.4 Hz, 2H), 4.00 (s, 2H), 2.30 (s, 3H). <sup>13</sup>C NMR (100 MHz, CDCl<sub>3</sub>) δ 137.0, 136.5, 132.9, 131.8, 131.2, 130.2, 129.8, 128.6, 39.3, 21.2.

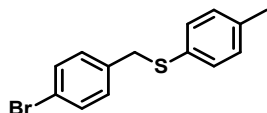

**4-bromobenzyl *p*-tolyl sulfane (1c)**,<sup>[4]</sup> the title compound was achieved as a white solid, 2.9 g, 99% yield.

<sup>1</sup>H NMR (400 MHz, CDCl<sub>3</sub>, TMS) δ 7.39 (d, *J* = 8.4 Hz, 2H), 7.20 (d, *J* = 8.0 Hz, 2H), 7.11 (d, *J* = 8.0 Hz, 2H), 7.07 (d, *J* = 8.0 Hz, 2H), 3.99 (s, 2H), 2.32 (s, 3H). <sup>13</sup>C NMR (100 MHz, CDCl<sub>3</sub>) δ 137.0, 137.0, 131.8, 131.6, 131.2, 130.6, 129.8, 121.0, 39.3, 21.2.

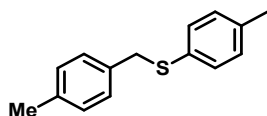

**4-methylbenzyl *p*-tolyl sulfane (1d)**,<sup>[3]</sup> the title compound was achieved as a white solid, 2.2 g, 99% yield.

<sup>1</sup>H NMR (400 MHz, CDCl<sub>3</sub>, TMS) δ 7.24 (d, *J* = 8.4 Hz, 2H), 7.18 (d, *J* = 8.0 Hz, 2H), 7.11 (d, *J* = 7.2 Hz, 2H), 7.08 (d, *J* = 8.0 Hz, 2H), 4.06 (s, 2H), 2.33 (s, 3H), 2.32 (s, 3H). <sup>13</sup>C NMR (100 MHz, CDCl<sub>3</sub>) δ 136.8, 136.4, 134.7, 132.8, 130.5, 129.7, 129.2, 128.8, 39.4, 21.2, 21.1.

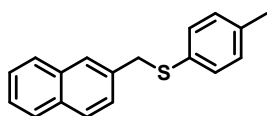

**naphthalen-2-ylmethyl *p*-tolyl sulfane (1e)**,<sup>[4]</sup> the title compound was achieved as a white solid, 2.5 g, 96% yield.

<sup>1</sup>H NMR (400 MHz, CDCl<sub>3</sub>, TMS) δ 7.83–7.74 (m, 3H), 7.66 (s, 1H), 7.48–7.43 (m, 3H),

7.24 (d,  $J=8.4$  Hz, 2H), 7.06 (d,  $J=8.0$  Hz, 2H), 4.24 (s, 2H), 2.31 (s, 3H).  $^{13}\text{C}$  NMR (100 MHz,  $\text{CDCl}_3$ )  $\delta$  136.7, 135.3, 133.3, 132.6, 132.4, 130.9, 129.7, 128.3, 127.8, 127.7, 127.4, 127.1, 126.1, 125.8, 40.2, 21.1.

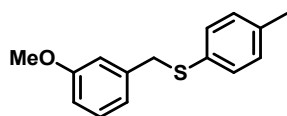

**3-methoxybenzyl *p*-tolyl sulfane (1f)**,<sup>[5]</sup> the title compound was achieved as a colorless liquid, 2.5 g, 99% yield.

$^1\text{H}$  NMR (400 MHz,  $\text{CDCl}_3$ , TMS)  $\delta$  7.28-7.21 (m, 3H), 7.11 (d,  $J=8.0$  Hz, 2H), 6.91 (d,  $J=7.6$  Hz, 1H), 6.87 (t,  $J=2.0$  Hz, 1H), 6.82 (dd,  $J_1=8.0$  Hz,  $J_2=2.0$  Hz, 1H), 4.09 (s, 2H), 3.79 (s, 3H), 2.35 (s, 3H).  $^{13}\text{C}$  NMR (100 MHz,  $\text{CDCl}_3$ )  $\delta$  159.7, 139.4, 136.6, 132.6, 130.7, 129.7, 129.5, 121.3, 114.2, 112.9, 55.2, 39.8, 21.2.

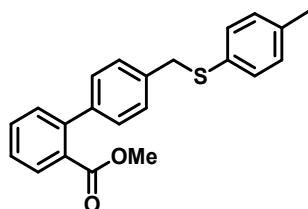

**(4-(2'-methoxycarbonyl)phenyl)benzyl *p*-tolyl sulfane (1g)**, the title compound was achieved as a colorless oil, 3.4 g, 99% yield.

$^1\text{H}$  NMR (400 MHz,  $\text{CDCl}_3$ , TMS)  $\delta$  7.82 (dd,  $J_1=7.6$  Hz,  $J_2=1.2$  Hz, 1H), 7.52 (td,  $J_1=7.6$  Hz,  $J_2=1.2$  Hz, 1H), 7.40 (td,  $J_1=7.6$  Hz,  $J_2=1.2$  Hz, 1H), 7.37 (dd,  $J_1=7.6$  Hz,  $J_2=1.2$  Hz, 1H), 7.30 (d,  $J=8.0$  Hz, 2H), 7.26-7.21 (m, 4H), 7.08 (d,  $J=8.0$  Hz, 2H), 4.12 (s, 2H), 3.60 (s, 3H), 2.30 (s, 3H).  $^{13}\text{C}$  NMR (100 MHz,  $\text{CDCl}_3$ )  $\delta$  169.3, 142.1, 140.1, 136.9, 136.7, 132.4, 131.3, 130.9, 130.8, 130.7, 129.8, 129.7, 128.7, 128.4, 127.2, 52.0, 39.6, 21.1. IR (neat):  $\nu=2948, 1718, 1491, 1447, 1281, 1244, 1124, 1088$   $\text{cm}^{-1}$ . HRMS (ESI):  $m/z$ :  $[\text{M}+\text{H}]^+$  Calculated for  $\text{C}_{22}\text{H}_{21}\text{O}_2\text{S}$ : 349.1262, found 349.1257.

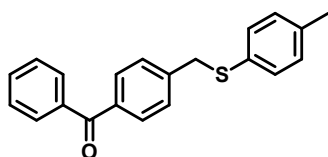

**4-phenylcarbonylbzyl *p*-tolyl sulfane (1h)**, the title compound was achieved as a white solid, mp. 74-75  $^\circ\text{C}$ , 3.2 g, 99% yield.

$^1\text{H}$  NMR (400 MHz,  $\text{CDCl}_3$ , TMS)  $\delta$  7.78 (dd,  $J_1=8.0$  Hz,  $J_2=1.2$  Hz, 2H), 7.72 (dt,  $J_1=8.4$  Hz,  $J_2=1.6$  Hz, 2H), 7.58 (tt,  $J_1=7.2$  Hz,  $J_2=1.2$  Hz, 1H), 7.47 (t,  $J=7.6$  Hz, 2H), 7.34 (d,  $J=8.4$  Hz, 2H), 7.22 (d,  $J=8.0$  Hz, 2H), 7.07 (d,  $J=8.0$  Hz, 2H), 4.10 (s, 2H), 2.31 (s, 3H).  $^{13}\text{C}$  NMR (100 MHz,  $\text{CDCl}_3$ )  $\delta$  196.4, 143.0, 137.7, 137.2, 136.3, 132.5, 131.6, 131.3, 130.4, 130.1, 129.8, 128.8, 128.3, 39.8, 21.2. IR (neat):  $\nu=2920, 1645, 1560, 1488, 1410, 1277, 1177, 1088$   $\text{cm}^{-1}$ . HRMS (ESI):  $m/z$ :  $[\text{M}+\text{H}]^+$  Calculated for  $\text{C}_{21}\text{H}_{19}\text{OS}$ : 319.1157, found 319.1150.

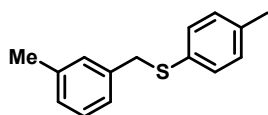

**3-methylbenzyl *p*-tolyl sulfane (1i)**,<sup>[5]</sup> the title compound was achieved as a colorless liquid, 2.0 g, 91% yield.

<sup>1</sup>H NMR (400 MHz, CDCl<sub>3</sub>, TMS) δ 7.34 (dd,  $J_1 = 8.0$  Hz,  $J_2 = 1.2$  Hz, 2H), 7.28 (t,  $J = 7.6$  Hz, 1H), 7.22 (s, 1H), 7.17 (q,  $J = 8.0$  Hz, 4H), 4.15 (s, 2H), 2.42 (s, 3H), 2.41 (s, 3H). <sup>13</sup>C NMR (100 MHz, CDCl<sub>3</sub>) δ 138.2, 137.7, 136.5, 133.9, 130.6, 129.8, 128.5, 128.1, 126.1, 39.8, 21.6, 21.2.

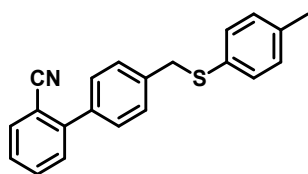

**(4(2'-cyano)phenyl)benzyl *p*-tolyl sulfane (1j)**, the title compound was achieved as a white solid, mp. 79-80 °C, 3.0 g, 95% yield.

<sup>1</sup>H NMR (400 MHz, CDCl<sub>3</sub>, TMS) δ 7.76 (dd,  $J_1 = 8.0$  Hz,  $J_2 = 1.2$  Hz, 1H), 7.63 (tt,  $J_1 = 8.0$  Hz,  $J_2 = 1.2$  Hz, 1H), 7.49 (tt,  $J_1 = 8.0$  Hz,  $J_2 = 1.6$  Hz, 3H), 7.43 (td,  $J_1 = 7.6$  Hz,  $J_2 = 1.2$  Hz, 1H), 7.38 (d,  $J = 8.4$  Hz, 2H), 7.25 (d,  $J = 8.8$  Hz, 2H), 7.09 (d,  $J = 8.0$  Hz, 2H), 4.12 (s, 2H), 2.32 (s, 3H). <sup>13</sup>C NMR (100 MHz, CDCl<sub>3</sub>) δ 145.1, 138.6, 136.9, 136.9, 133.8, 132.9, 131.0, 130.1, 129.8, 129.3, 128.9, 127.6, 118.8, 111.2, 39.6, 21.2. IR (neat):  $\nu = 2223, 1598, 1489, 1480, 1443, 1268, 1088, 1008$  cm<sup>-1</sup>. HRMS (ESI):  $m/z$ : [M+H]<sup>+</sup> Calculated for C<sub>21</sub>H<sub>18</sub>NS: 316.1160, found 316.1154.

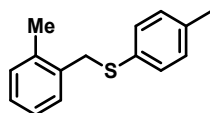

**2-methylbenzyl *p*-tolyl sulfane (1k)**,<sup>[5]</sup> the title compound was achieved as a colorless liquid, 2.3 g, 99% yield.

<sup>1</sup>H NMR (400 MHz, CDCl<sub>3</sub>, TMS) δ 7.27 (t,  $J = 8.0$  Hz, 2H), 7.20 (q, 2H), 7.17-7.10 (m, 4H), 4.10 (s, 2H), 2.43 (s, 3H), 2.36 (s, 3H). <sup>13</sup>C NMR (100 MHz, CDCl<sub>3</sub>) δ 136.8, 136.8, 135.5, 132.8, 131.1, 130.5, 129.9, 129.7, 127.5, 126.0, 38.2, 21.2, 19.3.

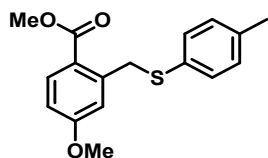

**2-methoxycarbonyl-5-methoxybenzyl *p*-tolyl sulfane (1l)**, the title compound was achieved as a yellow oil, 1.2 g, 99% yield.

<sup>1</sup>H NMR (400 MHz, CDCl<sub>3</sub>, TMS) δ 7.94 (d,  $J = 8.8$  Hz, 1H), 7.21 (d,  $J = 8.4$  Hz, 2H), 7.05 (d,  $J = 8.0$  Hz, 2H), 6.77 (dd,  $J_1 = 8.8$  Hz,  $J_2 = 2.8$  Hz, 1H), 6.61 (d,  $J = 2.4$  Hz, 1H), 4.46 (s, 2H), 3.85 (s, 3H), 3.71 (s, 3H), 2.30 (s, 3H). <sup>13</sup>C NMR (100 MHz, CDCl<sub>3</sub>) δ 167.2, 162.1, 142.8, 137.0, 133.4, 132.2, 132.1, 129.6, 121.0, 116.0, 112.6, 55.3, 51.9, 39.1, 21.1. IR

(neat):  $\nu = 2950, 1699, 1598, 1491, 1434, 1326, 1235, 1130 \text{ cm}^{-1}$ . HRMS (ESI):  $m/z$ :  $[\text{MH}]^+$  Calculated for  $\text{C}_{17}\text{H}_{19}\text{O}_3\text{S}$ : 303.1055, found 303.1049.

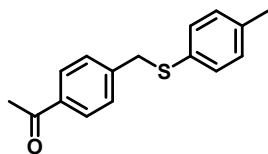

**4-methylcarbonylbenzyl *p*-tolyl sulfane (1n)**, the title compound was achieved as a white solid, mp. 75-77 °C, 1.1 g, 97% yield.

$^1\text{H}$  NMR (400 MHz,  $\text{CDCl}_3$ , TMS)  $\delta$  7.85 (d,  $J=8.4$  Hz, 2H), 7.31 (d,  $J=8.4$  Hz, 2H), 7.18 (d,  $J=8.4$  Hz, 2H), 7.05 (d,  $J=8.0$  Hz, 2H), 4.06 (s, 2H), 2.57 (s, 3H), 2.30 (s, 3H).  $^{13}\text{C}$  NMR (100 MHz,  $\text{CDCl}_3$ )  $\delta$  197.8, 143.7, 137.2, 135.9, 131.5, 131.3, 129.8, 129.0, 128.6, 39.7, 26.7, 21.1. IR (neat):  $\nu = 2918, 1678, 1602, 1490, 1412, 1357, 1263, 1090 \text{ cm}^{-1}$ . HRMS (ESI):  $m/z$ :  $[\text{MH}]^+$  Calculated for  $\text{C}_{16}\text{H}_{17}\text{OS}$ : 257.1000, found 257.0994.

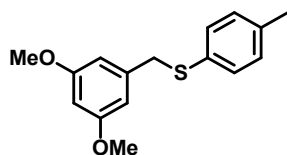

**3,5-dimethoxybenzyl *p*-tolyl sulfane (1m)**,<sup>[4]</sup> the title compound was achieved as a colorless liquid, 2.3 g, 86% yield.

$^1\text{H}$  NMR (400 MHz,  $\text{CDCl}_3$ , TMS)  $\delta$  7.25 (d,  $J=8.4$  Hz, 2H), 7.09 (d,  $J=7.6$  Hz, 2H), 6.45 (d,  $J=2.4$  Hz, 2H), 6.35 (t,  $J=2.0$  Hz, 1H), 4.02 (s, 2H), 3.75 (s, 6H), 2.32 (s, 3H).  $^{13}\text{C}$  NMR (100 MHz,  $\text{CDCl}_3$ )  $\delta$  160.8, 140.1, 136.6, 132.6, 130.7, 129.7, 106.7, 99.4, 55.3, 40.1, 21.1.

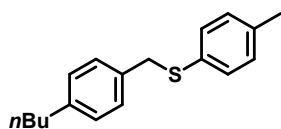

**4-butylbenzyl *p*-tolyl sulfane (1o)**, the title compound was achieved as a white liquid, 1.1 g, 93% yield.

$^1\text{H}$  NMR (400 MHz,  $\text{CDCl}_3$ , TMS)  $\delta$  7.22 (d,  $J=8.4$  Hz, 2H), 7.18 (d,  $J=8.0$  Hz, 2H), 7.09 (d,  $J=8.4$  Hz, 2H), 7.07 (d,  $J=8.8$  Hz, 2H), 4.05 (s, 2H), 2.58 (t,  $J=7.6$  Hz, 2H), 2.31 (s, 3H), 1.61-1.54 (m, 2H), 1.39-1.26 (m, 2H), 0.92 (t,  $J=7.2$  Hz, 3H).  $^{13}\text{C}$  NMR (100 MHz,  $\text{CDCl}_3$ )  $\delta$  141.8, 136.4, 134.8, 132.8, 130.5, 129.6, 128.8, 128.6, 39.5, 35.3, 33.7, 22.4, 21.1, 14.0. IR (neat):  $\nu = 2949, 2926, 1509, 1491, 1467, 1119, 1091, 1018 \text{ cm}^{-1}$ . HRMS (ESI):  $m/z$ :  $[\text{MH}]^+$  Calculated for  $\text{C}_{18}\text{H}_{23}\text{S}$ : 271.1520, found 271.1514.

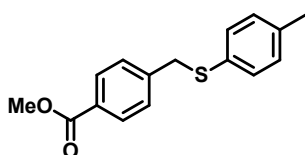

**4-methoxycarbonylbenzyl *p*-tolyl sulfane (1p)**,<sup>[6]</sup> the title compound was achieved as a

white solid, 3.1 g, 97% yield.

$^1\text{H}$  NMR (400 MHz,  $\text{CDCl}_3$ , TMS)  $\delta$  7.93 (d,  $J=8.0$  Hz, 2H), 7.28 (d,  $J=8.4$  Hz, 2H), 7.17 (d,  $J=8.0$  Hz, 2H), 7.05 (d,  $J=8.0$  Hz, 2H), 4.06 (s, 2H), 3.89 (s, 3H), 2.30 (s, 3H).  $^{13}\text{C}$  NMR (100 MHz,  $\text{CDCl}_3$ )  $\delta$  167.0, 143.4, 137.2, 131.5, 131.4, 129.8, 128.9, 52.1, 39.8, 21.1.

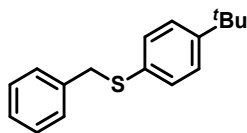

**benzyl(4-(*tert*-butyl)phenyl) sulfane (1q)**,<sup>[2]</sup> the title compound was achieved as a colorless liquid, 2.4 g, 95% yield.

$^1\text{H}$  NMR (400 MHz,  $\text{CDCl}_3$ , TMS)  $\delta$  7.39-7.26 (m, 9H), 4.17 (s, 2H), 1.37 (s, 9H).  $^{13}\text{C}$  NMR (100 MHz,  $\text{CDCl}_3$ )  $\delta$  149.7, 137.8, 133.1, 129.9, 129.0, 128.6, 127.2, 126.0, 39.5, 34.6, 31.4.

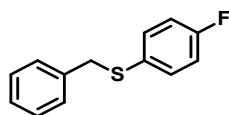

**benzyl(4-fluorophenyl) sulfane (1r)**,<sup>[2]</sup> the title compound was achieved as a white solid, 1.9 g, 91% yield.

$^1\text{H}$  NMR (400 MHz,  $\text{CDCl}_3$ , TMS)  $\delta$  7.31-7.26 (m, 5H), 7.24-7.21 (m, 2H), 6.95 (tt,  $J_1=8.8$  Hz,  $J_2=2.0$  Hz, 2H), 4.04 (s, 2H).  $^{13}\text{C}$  NMR (100 MHz,  $\text{CDCl}_3$ )  $\delta$  162.1 (d,  $J=245.4$  Hz, C-F), 137.6, 133.5 (d,  $J=8.1$  Hz), 130.8 (d,  $J=3.2$  Hz), 128.9, 128.5, 127.3, 116.0 (d,  $J=21.6$  Hz), 40.5.

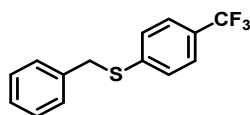

**benzyl(4-(trifluoromethyl)phenyl) sulfane (1s)**,<sup>[7]</sup> the title compound was achieved as a white solid, 2.4 g, 93% yield.

$^1\text{H}$  NMR (400 MHz,  $\text{CDCl}_3$ , TMS)  $\delta$  7.49 (d,  $J=8.4$  Hz, 2H), 7.37-7.26 (m, 7H), 4.19 (s, 2H).  $^{13}\text{C}$  NMR (100 MHz,  $\text{CDCl}_3$ )  $\delta$  142.1, 136.4, 128.8, 128.8, 127.9, 127.6, 127.6, 125.7 (q,  $J=3.7$  Hz), 124.2 (q,  $J=270.4$  Hz), 37.7.

### 3, General procedure for thioether directed mono-alkenylation

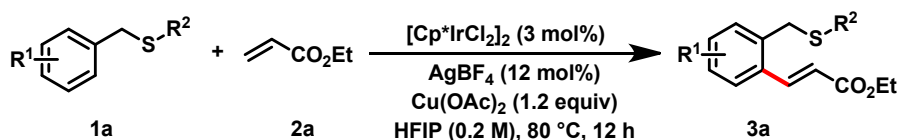

To a 35 mL screw-top sealed tube equipped with stir bar, was added benzyl *p*-tolyl thioethers **1a** (0.4 mmol), ethyl acrylate **2a** (1.1 mmol),  $[\text{Cp}^*\text{IrCl}_2]_2$  (3 mol%),  $\text{AgBF}_4$  (12

mol%) and Cu(OAc)<sub>2</sub> (87 mg, 0.48 mmol, 1.2equiv), HFIP (2 mL) was added *via* a syringe. The tube was then tightly capped. The reaction mixture was placed in a preheated oil-bath, and stirred at 80 °C for 12 h. The reaction mixture was allowed to cool to room temperature, then was quenched with water (10 mL) and extracted with ethyl acetate (3 x 20 mL). The organic layers were combined, and concentrated by rotary evaporation. The residue was subjected to flash column chromatography on silica gel, eluted with ethyl acetate/petroleum ether = 1/20, v/v) to afford the desired products **3a**.

#### 4, Characterization data for mono-alkenylation products

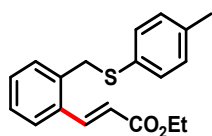

**Ethyl 2-((*p*-tolylthio)methyl)cinnamate (3a)**,<sup>[8]</sup> the title compound was achieved as a pale yellow oil, 104 mg, 80% yield, eluted with petroleum ether/EtOAc = 20/1.

<sup>1</sup>H NMR (400 MHz, CDCl<sub>3</sub>, TMS) δ 8.00 (d, *J* = 15.6 Hz, 1H), 7.57-7.53 (m, 1H), 7.29-7.19 (m, 5H), 7.06 (d, *J* = 8.0 Hz, 2H), 6.33 (d, *J* = 16.0 Hz, 1H), 4.27 (q, *J* = 7.2 Hz, 2H), 4.15 (s, 2H), 2.31 (s, 3H), 1.35 (t, *J* = 7.2 Hz, 3H). <sup>13</sup>C NMR (100 MHz, CDCl<sub>3</sub>) δ 166.6, 141.2, 137.3, 136.7, 133.6, 132.2, 131.4, 130.6, 129.8, 129.6, 127.7, 126.7, 119.9, 60.4, 37.9, 21.0, 14.3.

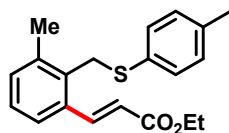

**Ethyl 3-methyl-2-((*p*-tolylthio)methyl)cinnamate (3b)**,<sup>[1]</sup> the title compound was achieved as a pale yellow oil, 91 mg, 70% yield, eluted with petroleum ether/EtOAc = 20/1.

<sup>1</sup>H NMR (400 MHz, CDCl<sub>3</sub>, TMS) δ 7.94 (d, *J* = 16.0 Hz, 1H), 7.36 (dd, *J*<sub>1</sub> = 6.8 Hz, *J*<sub>2</sub> = 1.6 Hz, 1H), 7.29-7.26 (m, 2H), 7.21-7.15 (m, 2H), 7.07 (d, *J* = 8.0 Hz, 2H), 6.22 (d, *J* = 15.6 Hz, 1H), 4.25 (q, *J* = 7.2 Hz, 2H), 4.15 (s, 2H), 2.41 (s, 3H), 2.33 (s, 3H), 1.34 (t, *J* = 7.2 Hz, 3H). <sup>13</sup>C NMR (100 MHz, CDCl<sub>3</sub>) δ 166.7, 142.1, 137.9, 137.5, 134.5, 134.4, 132.5, 132.0, 131.7, 129.7, 127.5, 124.7, 120.2, 60.4, 34.6, 21.1, 19.7, 14.3.

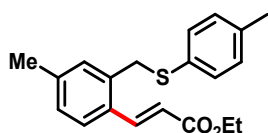

**Ethyl 4-methyl-2-((*p*-tolylthio)methyl)cinnamate (3c)**,<sup>[8]</sup> the title compound was achieved as a pale yellow oil, 100 mg, 77% yield, eluted with petroleum ether/EtOAc = 20/1.

<sup>1</sup>H NMR (400 MHz, CDCl<sub>3</sub>, TMS) δ 7.96 (d, *J* = 15.6 Hz, 1H), 7.47 (d, *J* = 8.0 Hz, 1H),



7.27–7.24 (t, 2H), 7.08 (d,  $J = 8.0$  Hz, 3H), 7.03 (s, 1H), 6.30 (d,  $J = 16$  Hz, 1H), 4.26 (q,  $J = 7.2$  Hz, 2H), 4.12 (s, 2H), 2.33 (s, 3H), 2.31 (s, 3H), 1.35 (t,  $J = 7.2$  Hz, 3H).  $^{13}\text{C}$  NMR (100 MHz,  $\text{CDCl}_3$ )  $\delta$  166.9, 141.2, 140.2, 137.3, 136.6, 132.1, 131.7, 131.4, 130.8, 129.6, 128.6, 126.7, 118.9, 60.4, 38.0, 21.2, 21.1, 14.3.

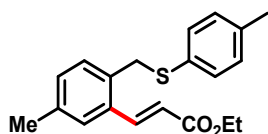

**Ethyl 5-methyl-2-((*p*-tolylthio)methyl)cinnamate (3d)**,<sup>[8]</sup> the title compound was achieved as a pale yellow oil, 110 mg, 84% yield, eluted with petroleum ether/EtOAc = 20/1.

$^1\text{H}$  NMR (400 MHz,  $\text{CDCl}_3$ , TMS)  $\delta$  7.98 (d,  $J = 16$  Hz, 1H), 7.37 (s, 1H), 7.25 (d,  $J = 8.0$  Hz, 2H), 7.12–7.06 (m, 4H), 6.34 (d,  $J = 15.6$  Hz, 1H), 4.27 (q,  $J = 7.2$  Hz, 2H), 4.13 (s, 2H), 2.34 (s, 3H), 2.32 (s, 3H), 1.35 (t,  $J = 7.2$  Hz, 3H).  $^{13}\text{C}$  NMR (100 MHz,  $\text{CDCl}_3$ )  $\delta$  166.7, 141.4, 137.4, 137.1, 133.7, 133.3, 131.9, 131.7, 130.7, 130.5, 129.6, 127.2, 119.6, 60.4, 37.6, 21.1, 21.0, 14.3.

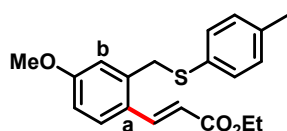

**Ethyl 4-methoxy-2-((*p*-tolylthio)methyl)cinnamate (3e)**, the title compound was achieved as a pale yellow oil, 90 mg, 66% yield, eluted with petroleum ether/EtOAc = 20/1. The isolated products are inseparable mixture on Silica Gel, the ratio is a: b = 3: 1.  $^1\text{H}$  NMR (400 MHz,  $\text{CDCl}_3$ , TMS)  $\delta$  7.94 (d,  $J = 16.4$  Hz, 1H), 7.93 (d,  $J = 15.6$  Hz, 3H), 7.53 (d,  $J = 8.4$  Hz, 3H), 7.29–7.24 (m, 8H), 7.20 (t,  $J = 8.0$  Hz, 1H), 7.10–7.07 (m, 8H), 6.87–6.79 (m, 5H), 6.74–6.70 (m, 4H), 6.24 (d,  $J = 16$  Hz, 3H), 4.26 (q,  $J = 7.2$  Hz, 2H), 4.25 (q,  $J = 7.2$  Hz, 6H), 4.15 (s, 2H), 4.13 (s, 6H), 3.87 (s, 3H), 3.75 (s, 9H), 2.32 (s, 3H), 2.32 (s, 9H), 1.33 (t,  $J = 7.2$  Hz, 12H).  $^{13}\text{C}$  NMR (100 MHz,  $\text{CDCl}_3$ )  $\delta$  167.6, 167.0, 160.7, 158.9, 140.7, 138.6, 138.3, 137.9, 137.4, 137.1, 132.2, 131.9, 131.8, 131.4, 129.9, 129.6, 128.2, 125.9, 123.1, 122.9, 122.5, 117.4, 115.2, 114.0, 110.0, 60.3, 55.5, 55.2, 38.7, 38.1, 21.0, 14.3. IR (neat):  $\nu = 2978, 1707, 1630, 1602, 1493, 1365, 1175, 1160$   $\text{cm}^{-1}$ . HRMS (ESI):  $m/z$ :  $[\text{MH}]^+$  Calculated for  $\text{C}_{20}\text{H}_{23}\text{O}_3\text{S}$ : 343.1368, found 343.1364.

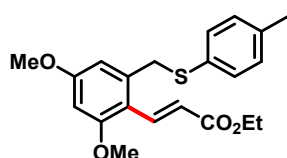

**Ethyl 4,6-dimethoxy-2-((*p*-tolylthio)methyl)cinnamate (3f)**, the title compound was achieved as a pale yellow oil, 113 mg, 76% yield, eluted with petroleum ether/EtOAc = 20/1.

$^1\text{H}$  NMR (400 MHz,  $\text{CDCl}_3$ , TMS)  $\delta$  7.90 (d,  $J = 16$  Hz, 1H), 7.28 (d,  $J = 8.0$  Hz, 2H), 7.08 (d,  $J = 8.0$  Hz, 1H), 6.66 (d,  $J = 16$  Hz, 1H), 6.38 (s, 1H), 6.35 (s, 1H), 4.25 (q,  $J =$

7.2 Hz, 2H), 4.14 (s, 2H), 3.85 (s, 3H), 3.73 (s, 3H), 2.32 (s, 3H), 1.33 (t,  $J = 7.2$  Hz, 3H).  $^{13}\text{C}$  NMR (100 MHz,  $\text{CDCl}_3$ )  $\delta$  168.2, 160.9, 160.8, 139.9, 137.5, 137.2, 132.0, 131.8, 129.6, 120.4, 115.3, 107.0, 97.9, 60.1, 55.5, 55.2, 39.1, 21.0, 14.3. IR (neat):  $\nu = 2976, 1694, 1621, 1596, 1450, 1305, 1171, 1158$   $\text{cm}^{-1}$ . HRMS (ESI):  $m/z$ :  $[\text{MH}]^+$  Calculated for  $\text{C}_{21}\text{H}_{25}\text{O}_4\text{S}$ : 373.1474, found 373.1469.

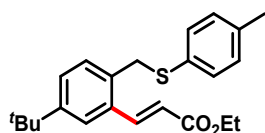

**Ethyl 5-(tert-butyl)-2-((*p*-tolylthio)methyl)cinnamate (3g)**, the title compound was achieved as a pale yellow oil, 105 mg, 71% yield, eluted with petroleum ether/EtOAc = 20/1.

$^1\text{H}$  NMR (400 MHz,  $\text{CDCl}_3$ , TMS)  $\delta$  8.04 (d,  $J = 16$  Hz, 1H), 7.58 (s, 1H), 7.32 (d,  $J = 8.0$  Hz, 1H), 7.27 (d,  $J = 8.0$  Hz, 2H), 7.19 (d,  $J = 8.4$  Hz, 1H), 7.08 (d,  $J = 8.0$  Hz, 2H), 6.38 (d,  $J = 16$  Hz, 1H), 4.29 (q,  $J = 7.2$  Hz, 2H), 4.16 (s, 2H), 2.33 (s, 3H), 1.36 (t,  $J = 7.2$  Hz, 3H), 1.32 (s, 9H).  $^{13}\text{C}$  NMR (100 MHz,  $\text{CDCl}_3$ )  $\delta$  166.8, 150.7, 141.9, 137.1, 133.7, 133.0, 132.0, 131.7, 130.4, 129.6, 127.2, 123.5, 119.6, 60.4, 37.6, 34.6, 31.2, 21.0, 14.3. IR (neat):  $\nu = 2966, 1709, 1634, 1492, 1365, 1301, 1174, 1036$   $\text{cm}^{-1}$ . HRMS (ESI):  $m/z$ :  $[\text{MH}]^+$  Calculated for  $\text{C}_{23}\text{H}_{29}\text{O}_2\text{S}$ : 369.1888, found 369.1884.

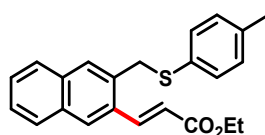

**(*E*)-ethyl 3-(3-((*p*-tolylthio)methyl)naphthalen-2-yl)acrylate (3h)**, the title compound was achieved as a pale yellow oil, 136 mg, 93% yield, eluted with petroleum ether/EtOAc = 20/1.

$^1\text{H}$  NMR (400 MHz,  $\text{CDCl}_3$ , TMS)  $\delta$  8.18 (d,  $J = 15.6$  Hz, 1H), 8.07 (s, 1H), 7.83-7.80 (m, 1H), 7.71-7.67 (m, 1H), 7.59 (s, 1H), 7.48-7.44 (m, 2H), 7.27-7.24 (m, 3H), 7.05 (d,  $J = 8.0$  Hz, 2H), 6.51 (d,  $J = 15.6$  Hz, 1H), 4.30 (q,  $J = 7.2$  Hz, 2H), 4.29 (s, 2H), 2.31 (s, 3H), 1.37 (t,  $J = 7.2$  Hz, 3H).  $^{13}\text{C}$  NMR (100 MHz,  $\text{CDCl}_3$ )  $\delta$  166.7, 141.9, 137.4, 133.7, 133.5, 132.5, 132.2, 132.1, 131.6, 129.7, 129.2, 128.1, 127.4, 127.1, 126.9, 126.4, 120.6, 60.5, 38.8, 21.1, 14.4. IR (neat):  $\nu = 2972, 1698, 1617, 1493, 1441, 1367, 1093, 1047$   $\text{cm}^{-1}$ . HRMS (ESI):  $m/z$ :  $[\text{MH}]^+$  Calculated for  $\text{C}_{23}\text{H}_{23}\text{O}_2\text{S}$ : 363.1419, found 363.1415.

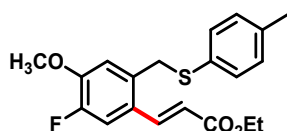

**Ethyl 5-fluoro-4-methoxy-2-((*p*-tolylthio)methyl)cinnamate (3i)**, the title compound was achieved as a pale yellow solid, mp. 74-75  $^\circ\text{C}$ , 95 mg, 66% yield, eluted with petroleum ether/EtOAc = 20/1.

$^1\text{H}$  NMR (400 MHz,  $\text{CDCl}_3$ , TMS)  $\delta$  7.81 (dd,  $J_1 = 16$  Hz,  $J_2 = 1.6$  Hz, 1H), 7.25 (d,  $J =$

12 Hz, 1H), 7.20 (d,  $J = 8.0$  Hz, 2H), 7.06 (d,  $J = 8.0$  Hz, 2H), 6.65 (d,  $J = 8.8$  Hz, 1H), 6.18 (d,  $J = 15.6$  Hz, 1H), 4.25 (q,  $J = 7.2$  Hz, 2H), 4.08 (s, 2H), 3.77 (s, 3H), 2.31 (s, 3H), 1.33 (t,  $J = 7.2$  Hz, 3H).  $^{19}\text{F}$  NMR (376 MHz,  $\text{CDCl}_3$ )  $\delta$  -136.1 (m, 1F).  $^{13}\text{C}$  NMR (100 MHz,  $\text{CDCl}_3$ )  $\delta$  166.7, 151.4 (d,  $J = 245.6$  Hz, C-F), 148.6 (d,  $J = 10.9$  Hz), 139.6 (d,  $J = 2.0$  Hz), 137.8, 133.8 (d,  $J = 3.3$  Hz), 132.8, 130.8, 129.7, 126.0 (d,  $J = 6.3$  Hz), 118.5, 114.9 (d,  $J = 2.1$  Hz), 113.7 (d,  $J = 18.9$  Hz), 60.5, 55.9, 37.6, 21.0, 14.3. IR (neat):  $\nu = 3008, 2984, 1703, 1628, 1509, 1441, 1363, 1293, 1170, 1140$   $\text{cm}^{-1}$ . HRMS (ESI):  $m/z$ :  $[\text{MH}]^+$  Calculated for  $\text{C}_{20}\text{H}_{22}\text{FO}_3\text{S}$ : 361.1274, found 361.1270.

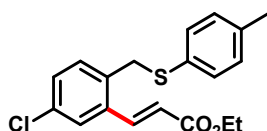

**Ethyl 5-chloro-2-((*p*-tolylthio)methyl)cinnamate (3j)**,<sup>[8]</sup> the title compound was achieved as a pale yellow oil, 81 mg, 58% yield, eluted with petroleum ether/EtOAc = 20/1.

$^1\text{H}$  NMR (400 MHz,  $\text{CDCl}_3$ , TMS)  $\delta$  7.86 (d,  $J = 16$  Hz, 1H), 7.49 (d,  $J = 2$  Hz, 1H), 7.22–7.19 (m, 3H), 7.09–7.04 (m, 3H), 6.29 (d,  $J = 15.6$  Hz, 1H), 4.26 (q,  $J = 6.8$  Hz, 2H), 4.07 (s, 2H), 2.31 (s, 3H), 1.34 (t,  $J = 6.8$  Hz, 3H).  $^{13}\text{C}$  NMR (100 MHz,  $\text{CDCl}_3$ )  $\delta$  166.3, 139.9, 137.7, 135.3, 135.2, 133.5, 132.6, 131.9, 130.7, 129.7, 129.6, 126.6, 121.1, 60.6, 37.5, 21.1, 14.3.

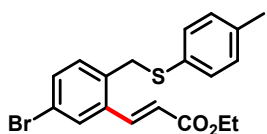

**Ethyl 5-bromo-2-((*p*-tolylthio)methyl)cinnamate (3k)**, the title compound was achieved as a pale yellow solid, mp. 69–71  $^\circ\text{C}$ , 93 mg, 60% yield, eluted with petroleum ether/EtOAc = 20/1.

$^1\text{H}$  NMR (400 MHz,  $\text{CDCl}_3$ , TMS)  $\delta$  7.85 (d,  $J = 15.6$  Hz, 1H), 7.65 (s, 1H), 7.35 (d,  $J = 8.4$  Hz, 1H), 7.20 (d,  $J = 7.6$  Hz, 2H), 7.07–7.02 (m, 3H), 6.28 (d,  $J = 15.6$  Hz, 1H), 4.26 (q,  $J = 7.2$  Hz, 2H), 4.06 (s, 2H), 2.31 (s, 3H), 1.35 (t,  $J = 7.2$  Hz, 3H).  $^{13}\text{C}$  NMR (100 MHz,  $\text{CDCl}_3$ )  $\delta$  166.3, 139.8, 137.7, 135.8, 135.5, 132.6, 132.5, 132.1, 130.7, 129.7, 129.5, 121.5, 121.2, 60.6, 37.6, 21.1, 14.3. IR (neat):  $\nu = 2982, 1712, 1634, 1562, 1489, 1312, 1183, 1090$   $\text{cm}^{-1}$ . HRMS (ESI):  $m/z$ :  $[\text{MH}]^+$  Calculated for  $\text{C}_{19}\text{H}_{20}\text{BrO}_2\text{S}$ : 391.0367, found 391.0363.

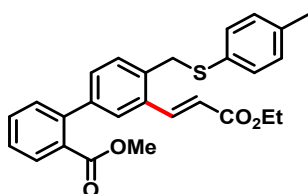

**Ethyl 5-(2'-(methoxycarbonyl)phenyl)-2-((*p*-tolylthio)methyl)cinnamate (3l)**, the title compound was achieved as a pale yellow oil, 128 mg, 72% yield, eluted with petroleum

ether/EtOAc = 5/1.

$^1\text{H}$  NMR (400 MHz,  $\text{CDCl}_3$ , TMS)  $\delta$  8.02 (d,  $J = 16$  Hz, 1H), 7.55 (dd,  $J_1 = 7.6$  Hz,  $J_2 = 1.2$  Hz, 1H), 7.54 (td,  $J_1 = 7.6$  Hz,  $J_2 = 1.2$  Hz, 1H), 7.50 (d,  $J = 1.2$  Hz, 1H), 7.43 (td,  $J_1 = 7.6$  Hz,  $J_2 = 1.2$  Hz, 1H), 7.35 (dd,  $J_1 = 7.6$  Hz,  $J_2 = 1.2$  Hz, 1H), 7.28-7.24 (m, 2H), 7.25-7.19 (m, 2H), 7.07 (d,  $J = 8.0$  Hz, 2H), 6.33 (d,  $J = 16$  Hz, 1H), 4.26 (q,  $J = 7.2$  Hz, 2H), 4.18 (s, 2H), 3.63 (s, 3H), 2.32 (s, 3H), 1.33 (t,  $J = 7.2$  Hz, 3H).  $^{13}\text{C}$  NMR (100 MHz,  $\text{CDCl}_3$ )  $\delta$  168.7, 166.6, 141.5, 141.1, 140.8, 137.4, 135.7, 133.4, 132.3, 131.4, 131.3, 130.6, 130.5, 130.4, 129.9, 129.8, 129.7, 127.5, 126.6, 120.2, 60.5, 51.9, 37.8, 21.0, 14.3. IR (neat):  $\nu = 2924, 1713, 1635, 1492, 1447, 1365, 1176, 1126$   $\text{cm}^{-1}$ . HRMS (ESI):  $m/z$ :  $[\text{MH}]^+$  Calculated for  $\text{C}_{27}\text{H}_{27}\text{O}_4\text{S}$ : 447.1630, found 447.1626.

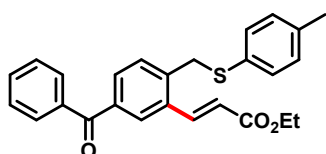

**Ethyl 5-benzoyl-2-((*p*-tolylthio)methyl)cinnamate (3n)**, the title compound was achieved as a pale yellow oil, 100 mg, 60% yield, eluted with petroleum ether/EtOAc = 5/1.

$^1\text{H}$  NMR (400 MHz,  $\text{CDCl}_3$ , TMS)  $\delta$  7.96 (d,  $J = 15.6$  Hz, 1H), 7.95 (d,  $J = 3.6$  Hz, 1H), 7.78-7.76 (m, 2H), 7.67-7.59 (m, 2H), 7.49 (t,  $J = 8.0$  Hz, 2H), 7.27-7.22 (m, 3H), 7.06 (d,  $J = 8.0$  Hz, 2H), 6.32 (d,  $J = 16$  Hz, 1H), 4.26 (q,  $J = 7.2$  Hz, 2H), 4.17 (s, 2H), 2.31 (s, 3H), 1.34 (t,  $J = 7.2$  Hz, 3H).  $^{13}\text{C}$  NMR (100 MHz,  $\text{CDCl}_3$ )  $\delta$  195.8, 166.4, 141.2, 140.3, 137.9, 137.2, 136.8, 133.8, 132.7, 132.6, 131.0, 130.6, 130.0, 129.8, 128.4, 121.3, 60.6, 38.0, 21.1, 14.3. IR (neat):  $\nu = 2982, 1709, 1658, 1492, 1448, 1369, 1264, 1177, 1091$   $\text{cm}^{-1}$ . HRMS (ESI):  $m/z$ :  $[\text{MH}]^+$  Calculated for  $\text{C}_{26}\text{H}_{25}\text{O}_3\text{S}$ : 417.1524, found 417.1520.

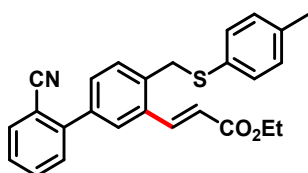

**Ethyl 5-(2'-(cyano)phenyl)-2-((*p*-tolylthio)methyl)cinnamate (3m)**, the title compound was achieved as a pale yellow oil, 154 mg, 75% yield, eluted with petroleum ether/EtOAc = 5/1.

$^1\text{H}$  NMR (400 MHz,  $\text{CDCl}_3$ , TMS)  $\delta$  7.99 (d,  $J = 15.6$  Hz, 1H), 7.76 (dd,  $J_1 = 7.6$  Hz,  $J_2 = 1.2$  Hz, 1H), 7.70 (d,  $J = 1.6$  Hz, 1H), 7.64 (td,  $J_1 = 8.0$  Hz,  $J_2 = 1.2$  Hz, 1H), 7.52-7.45 (m, 3H), 7.31 (d,  $J = 8.0$  Hz, 1H), 7.25 (d,  $J = 8.4$  Hz, 2H), 7.08 (d,  $J = 8.0$  Hz, 2H), 6.39 (d,  $J = 15.6$  Hz, 1H), 4.27 (q,  $J = 7.2$  Hz, 2H), 4.18 (s, 2H), 2.32 (s, 3H), 1.34 (t,  $J = 7.2$  Hz, 3H).  $^{13}\text{C}$  NMR (100 MHz,  $\text{CDCl}_3$ )  $\delta$  166.5, 144.3, 140.7, 137.6, 137.4, 137.2, 134.1, 133.7, 132.8, 132.5, 131.0, 130.9, 129.8, 129.7, 129.6, 127.8, 127.1, 120.9, 118.4, 111.2, 60.5, 37.8, 21.0, 14.3. IR (neat):  $\nu = 2919, 2226, 1716, 1634, 1494, 1482, 1310, 1185, 1173$   $\text{cm}^{-1}$ . HRMS (ESI):  $m/z$ :  $[\text{MH}]^+$  Calculated for  $\text{C}_{26}\text{H}_{24}\text{NO}_2\text{S}$ : 414.1528, found 414.1521.

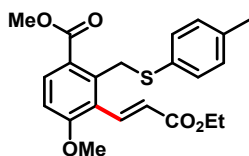

**Ethyl 6-methoxy-3-methoxycarbonyl-2-((*p*-tolylthio)methyl)cinnamate (3o)**, the title compound was achieved as a pale yellow solid, mp. 58-60 °C, 129 mg, 81% yield, eluted with petroleum ether/EtOAc = 20/1.

<sup>1</sup>H NMR (400 MHz, CDCl<sub>3</sub>, TMS) δ 7.88 (d, *J* = 8.8 Hz, 1H), 7.69 (d, *J* = 16 Hz, 1H), 7.25 (d, *J* = 8.0 Hz, 2H), 7.04 (d, *J* = 8.0 Hz, 2H), 6.82 (d, *J* = 8.8 Hz, 1H), 6.40 (d, *J* = 16.4 Hz, 1H), 4.61 (s, 2H), 4.23 (q, *J* = 7.2 Hz, 2H), 3.86 (s, 3H), 3.82 (s, 3H), 2.30 (s, 3H), 1.32 (t, *J* = 7.2 Hz, 3H). <sup>13</sup>C NMR (100 MHz, CDCl<sub>3</sub>) δ 167.4, 166.9, 160.5, 140.2, 137.7, 137.4, 133.2, 132.7, 131.6, 129.5, 124.9, 124.6, 122.9, 108.9, 60.4, 55.7, 52.0, 34.7, 21.0, 14.2. IR (neat): ν = 2950, 1711, 1581, 1494, 1478, 1433, 1263, 1177, 1159 cm<sup>-1</sup>. HRMS (ESI): *m/z*: [MH]<sup>+</sup> Calculated for C<sub>22</sub>H<sub>25</sub>O<sub>5</sub>S: 401.1423, found 401.1418.

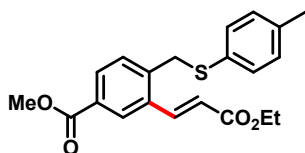

**Ethyl 5-methoxycarbonyl-2-((*p*-tolylthio)methyl)cinnamate (3p)**, the title compound was achieved as a pale yellow oil, 88 mg, 60% yield, eluted with petroleum ether/EtOAc = 5/1.

<sup>1</sup>H NMR (400 MHz, CDCl<sub>3</sub>, TMS) δ 8.20 (d, *J* = 1.6 Hz, 1H), 7.92 (d, *J* = 16 Hz, 1H), 7.87 (dd, *J*<sub>1</sub> = 8.0 Hz, *J*<sub>2</sub> = 1.6 Hz, 1H), 7.21-7.17 (m, 3H), 7.03 (d, *J* = 8.0 Hz, 2H), 6.39 (d, *J* = 16 Hz, 1H), 4.27 (q, *J* = 7.2 Hz, 2H), 4.12 (s, 2H), 3.91 (s, 3H), 2.30 (s, 3H), 1.35 (t, *J* = 7.2 Hz, 3H). <sup>13</sup>C NMR (100 MHz, CDCl<sub>3</sub>) δ 166.4, 166.3, 141.8, 140.2, 137.9, 133.8, 132.8, 130.7, 130.5, 130.4, 129.7, 129.5, 128.0, 121.2, 60.6, 52.2, 37.9, 21.1, 14.3. IR (neat): ν = 2988, 1709, 1637, 1488, 1436, 1371, 1176, 1145 cm<sup>-1</sup>. HRMS (ESI): *m/z*: [MH]<sup>+</sup> Calculated for C<sub>21</sub>H<sub>23</sub>O<sub>4</sub>S: 371.1317, found 371.1313.

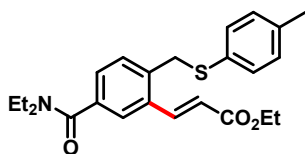

**Ethyl 5-diethylcarbamoyl-2-((*p*-tolylthio)methyl)cinnamate (3q)**, the title compound was achieved as a colorless oil, 107 mg, 65% yield, eluted with petroleum ether/EtOAc = 5/1.

<sup>1</sup>H NMR (400 MHz, CDCl<sub>3</sub>, TMS) δ 7.94 (d, *J* = 16 Hz, 1H), 7.52 (d, *J* = 1.6 Hz, 1H), 7.25-7.17 (m, 4H), 7.04 (d, *J* = 8.0 Hz, 2H), 6.31 (d, *J* = 16 Hz, 1H), 4.26 (q, *J* = 7.2 Hz, 2H), 4.13 (s, 2H), 3.53 (s, 2H), 3.23 (s, 2H), 2.30 (s, 3H), 1.32 (t, *J* = 7.2 Hz, 3H), 1.25 (s, 3H), 1.11 (s, 3H). <sup>13</sup>C NMR (100 MHz, CDCl<sub>3</sub>) δ 170.4, 166.5, 140.5, 137.7, 137.6, 136.6, 133.9, 132.6, 130.9, 130.7, 129.7, 127.4, 124.8, 120.9, 60.6, 43.3, 39.4, 37.9, 21.1, 14.3, 14.2, 12.9. IR (neat): ν = 2976, 1710, 1628, 1428, 1385, 1311, 1175, 1095 cm<sup>-1</sup>. HRMS (ESI): *m/z*: [MH]<sup>+</sup> Calculated for C<sub>24</sub>H<sub>30</sub>NO<sub>3</sub>S: 412.1946, found 412.1943.

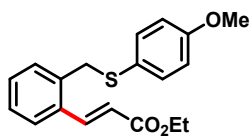

**Ethyl 2-((4-methoxyphenyl)thio)cinnamate (3r)**, the title compound was achieved as a colorless oil, 92 mg, 70% yield, eluted with petroleum ether/EtOAc = 20/1.

$^1\text{H}$  NMR (400 MHz,  $\text{CDCl}_3$ , TMS)  $\delta$  7.96 (d,  $J = 16$  Hz, 1H), 7.56-7.53 (m, 1H), 7.28-7.24 (m, 4H), 7.13-7.10 (m, 1H), 6.80-6.76 (m, 2H), 6.32 (d,  $J = 16$  Hz, 1H), 4.28 (q,  $J = 7.2$  Hz, 2H), 4.09 (s, 2H), 3.79 (s, 3H), 1.37 (t,  $J = 7.2$  Hz, 3H).  $^{13}\text{C}$  NMR (100 MHz,  $\text{CDCl}_3$ )  $\delta$  166.7, 159.6, 141.2, 137.1, 135.3, 133.5, 130.7, 129.7, 127.6, 126.6, 125.0, 119.7, 114.4, 60.4, 55.2, 39.0, 14.3. IR (neat):  $\nu = 2982, 1707, 1633, 1589, 1493, 1314, 1172, 1031$   $\text{cm}^{-1}$ . HRMS (ESI):  $m/z$ :  $[\text{MH}]^+$  Calculated for  $\text{C}_{19}\text{H}_{21}\text{O}_3\text{S}$ : 329.1211, found 329.1207.

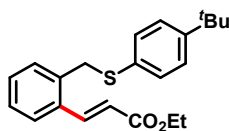

**Ethyl 2-((4-*tert*-butyl)phenyl)thio)cinnamate (3s)**, the title compound was achieved as a pale yellow oil, 99 mg, 70% yield, eluted with petroleum ether/EtOAc = 20/1.

$^1\text{H}$  NMR (400 MHz,  $\text{CDCl}_3$ , TMS)  $\delta$  8.02 (d,  $J = 16$  Hz, 1H), 7.57-7.53 (m, 1H), 7.29-7.23 (m, 7H), 6.35 (d,  $J = 16$  Hz, 1H), 4.27 (q,  $J = 7.2$  Hz, 2H), 4.17 (s, 2H), 1.34 (t,  $J = 7.2$  Hz, 3H), 1.30 (s, 9H).  $^{13}\text{C}$  NMR (100 MHz,  $\text{CDCl}_3$ )  $\delta$  166.8, 150.5, 141.4, 136.7, 133.7, 131.9, 131.5, 130.8, 130.0, 127.9, 126.8, 126.0, 120.1, 60.6, 37.7, 34.6, 31.3, 14.4. IR (neat):  $\nu = 2962, 1709, 1634, 1488, 1365, 1313, 1175, 1119$   $\text{cm}^{-1}$ . HRMS (ESI):  $m/z$ :  $[\text{MH}]^+$  Calculated for  $\text{C}_{22}\text{H}_{27}\text{O}_2\text{S}$ : 355.1732, found 355.1729.

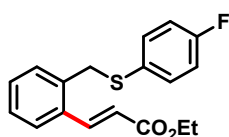

**Ethyl 2-((4-fluorophenyl)thio)cinnamate (3t)**, the title compound was achieved as a pale yellow oil, 105 mg, 83% yield, eluted with petroleum ether/EtOAc = 20/1.

$^1\text{H}$  NMR (400 MHz,  $\text{CDCl}_3$ , TMS)  $\delta$  7.95 (d,  $J = 15.6$  Hz, 1H), 7.56-7.52 (m, 1H), 7.31-7.22 (m, 4H), 7.13-7.09 (m, 1H), 6.96-6.90 (m, 2H), 6.32 (d,  $J = 16$  Hz, 1H), 4.27 (q,  $J = 7.2$  Hz, 2H), 4.11 (s, 2H), 1.34 (t,  $J = 7.2$  Hz, 3H).  $^{19}\text{F}$  NMR (376 MHz,  $\text{CDCl}_3$ ) -114.5 (m, 1F).  $^{13}\text{C}$  NMR (100 MHz,  $\text{CDCl}_3$ )  $\delta$  166.8, 162.6 (d,  $J = 246.6$  Hz, C-F), 141.2, 136.5, 134.9 (d,  $J = 8.2$  Hz), 133.5, 130.7, 129.8, 129.7 (d,  $J = 3.3$  Hz), 127.8, 126.7, 120.0, 115.9 (d,  $J = 21.7$  Hz), 60.6, 38.5, 14.4. IR (neat):  $\nu = 2982, 1707, 1634, 1589, 1489, 1313, 1216, 1176, 1155$   $\text{cm}^{-1}$ . HRMS (ESI):  $m/z$ :  $[\text{MH}]^+$  Calculated for  $\text{C}_{18}\text{H}_{18}\text{FO}_2\text{S}$ : 317.1012, found 317.1008.

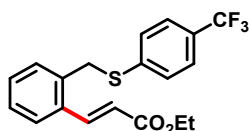

**Ethyl 2-((4-(trifluoromethyl)phenyl)thio)cinnamate (3u)**, the title compound was achieved as a white solid, mp. 59-61 °C 126 mg, 86% yield, eluted with petroleum ether/EtOAc = 20/1.

<sup>1</sup>H NMR (400 MHz, CDCl<sub>3</sub>, TMS) δ 8.01 (d, *J* = 15.6 Hz, 1H), 7.58-7.56 (m, 1H), 7.50 (d, *J* = 8.4 Hz, 2H), 7.37 (d, *J* = 8.0 Hz, 2H), 7.30-7.26 (m, 3H), 6.38 (d, *J* = 15.6 Hz, 1H), 4.26 (q, *J* = 7.2 Hz, 2H), 4.26 (s, 2H), 1.32 (t, *J* = 7.2 Hz, 3H). <sup>19</sup>F NMR (376 MHz, CDCl<sub>3</sub>) δ -63.2 (s, 3F). <sup>13</sup>C NMR (100 MHz, CDCl<sub>3</sub>) δ 166.6, 141.1, 140.8, 135.2, 133.7, 130.6, 130.2, 129.3, 128.6, 128.3, 127.0, 125.7 (q, *J* = 3.7 Hz), 124.1 (q, *J* = 270.5 Hz), 120.6, 60.7, 36.0, 14.3. IR (neat): ν = 2980, 1704, 1603, 1482, 1371, 1324, 1158, 1106 cm<sup>-1</sup>. HRMS (ESI): *m/z*: [MH]<sup>+</sup> Calculated for C<sub>19</sub>H<sub>18</sub>F<sub>3</sub>O<sub>2</sub>S: 367.0980, found 367.0975.

## 5, General procedure for thioether directed mono-alkenylation of various olefins

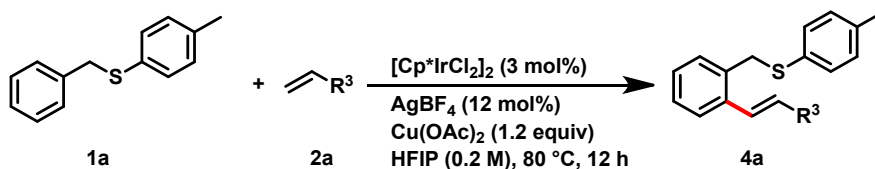

To a 35 mL screw-top sealed tube equipped with stir bar, was added sulfur ethers **1a** (0.4 mmol), alkene **2a** (0.44 mmol), [Cp\*IrCl<sub>2</sub>]<sub>2</sub> (3 mol%), AgBF<sub>4</sub> (12 mol%) and Cu(OAc)<sub>2</sub> (87 mg, 0.48 mmol, 1.2 equiv), HFIP (2 mL) was added *via* a syringe. The tube was then tightly capped. The reaction mixture was placed in a preheated oil-bath, and stirred at 80 °C for 12 h. The reaction mixture was allowed to cool to room temperature, water (10 mL) was added and extracted with ethyl acetate (20 mL\*3). The organic layers were combined and dried over anhydrous Na<sub>2</sub>SO<sub>4</sub>. After removing solvent by rotary evaporation, the residue was subjected to flash column chromatography on silica gel to afford the desired products **4a**.

## 6, Characterization data for mono-alkenylation products of various olefins

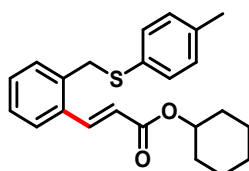

**Cyclohexyl 2-((p-tolylthio)methyl)cinnamate (4a)**, the title compound was achieved as a colorless oil, 95 mg, 65% yield, eluted with petroleum ether/EtOAc = 20/1.

<sup>1</sup>H NMR (400 MHz, CDCl<sub>3</sub>, TMS) δ 7.99 (d, *J* = 16 Hz, 1H), 7.56-7.52 (m, 1H), 7.27-7.18 (m, 5H), 7.05 (d, *J* = 7.6 Hz, 2H), 6.31 (d, *J* = 16 Hz, 1H), 4.93-4.86 (m, 1H), 4.14 (s,

2H), 2.31 (s, 3H), 1.94-1.89 (m, 2H), 1.78-1.74 (m, 2H), 1.59-1.25 (m, 6H). <sup>13</sup>C NMR (100 MHz, CDCl<sub>3</sub>) δ 166.1, 141.0, 137.3, 136.6, 133.7, 132.1, 131.5, 130.6, 129.7, 129.6, 127.7, 126.7, 120.6, 72.6, 38.0, 31.7, 25.4, 23.7, 21.0. IR (neat): ν = 2937, 1704, 1634, 1492, 1450, 1321, 1177, 1122 cm<sup>-1</sup>. HRMS (ESI): m/z: [MH]<sup>+</sup> Calculated for C<sub>23</sub>H<sub>27</sub>O<sub>2</sub>S: 367.1732, found 367.1728.

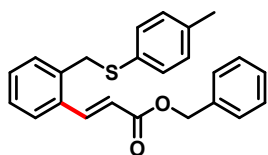

**Benzyl 2-((*p*-tolylthio)methyl)cinnamate (4b)**, the title compound was achieved as a pale yellow oil, 97 mg, 65% yield, eluted with petroleum ether/EtOAc = 20/1.

<sup>1</sup>H NMR (400 MHz, CDCl<sub>3</sub>, TMS) δ 8.05 (d, *J* = 16 Hz, 1H), 7.55-7.51 (m, 1H), 7.42-7.30 (m, 5H), 7.26-7.22 (m, 2H), 7.21-7.16 (m, 3H), 7.02 (d, *J* = 8.0 Hz, 2H), 6.37 (d, *J* = 15.6 Hz, 1H), 5.24 (s, 2H), 4.13 (s, 2H), 2.29 (s, 3H). <sup>13</sup>C NMR (100 MHz, CDCl<sub>3</sub>) δ 166.5, 141.8, 137.3, 136.8, 136.0, 133.5, 132.2, 131.3, 130.7, 130.0, 129.6, 128.5, 128.2, 127.7, 126.7, 119.5, 66.3, 37.9, 21.0. IR (neat): ν = 2925, 1710, 1632, 1492, 1454, 1312, 1159, 1091 cm<sup>-1</sup>. HRMS (ESI): m/z: [MH]<sup>+</sup> Calculated for C<sub>24</sub>H<sub>23</sub>O<sub>2</sub>S: 375.1419, found 375.1415.

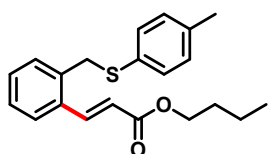

**Butyl 2-((*p*-tolylthio)methyl)cinnamate (4c)**, the title compound was achieved as a colorless oil, 106 mg, 78% yield, eluted with petroleum ether/EtOAc = 20/1.

<sup>1</sup>H NMR (400 MHz, CDCl<sub>3</sub>, TMS) δ 8.01 (d, *J* = 16 Hz, 1H), 7.56-7.52 (m, 1H), 7.27-7.23 (m, 3H), 7.21-7.17 (m, 2H), 7.06 (d, *J* = 8.0 Hz, 2H), 6.34 (d, *J* = 16 Hz, 1H), 4.22 (t, *J* = 6.8 Hz, 2H), 4.15 (s, 2H), 2.32 (s, 3H), 1.72-1.62 (m, 2H), 1.48-1.39 (m, 2H), 0.98 (t, *J* = 7.2 Hz, 3H). <sup>13</sup>C NMR (100 MHz, CDCl<sub>3</sub>) δ 166.8, 141.2, 137.3, 136.7, 133.5, 132.1, 131.4, 130.6, 129.8, 129.6, 127.7, 126.7, 129.9, 64.3, 37.9, 30.7, 21.0, 19.1, 13.7. IR (neat): ν = 2971, 1713, 1634, 1492, 1454, 1315, 1088, 1046 cm<sup>-1</sup>. HRMS (ESI): m/z: [MH]<sup>+</sup> Calculated for C<sub>21</sub>H<sub>25</sub>O<sub>2</sub>S: 341.1575, found 341.1571.

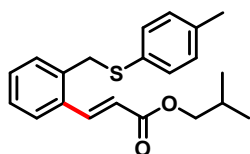

**Isobutyl 2-((*p*-tolylthio)methyl)cinnamate (4d)**, the title compound was achieved as a pale yellow oil, 96 mg, 71% yield, eluted with petroleum ether/EtOAc = 20/1.

<sup>1</sup>H NMR (400 MHz, CDCl<sub>3</sub>, TMS) δ 8.02 (d, *J* = 15.6 Hz, 1H), 7.57-7.53 (m, 1H), 7.27-7.17 (m, 5H), 7.05 (d, *J* = 8.0 Hz, 2H), 6.34 (d, *J* = 15.6 Hz, 1H), 4.15 (s, 2H), 4.00 (d, *J* = 6.4 Hz, 2H), 2.31 (s, 3H), 2.06-1.94 (m, 1H), 1.00 (s, 3H), 0.99 (s, 3H). <sup>13</sup>C NMR (100 MHz, CDCl<sub>3</sub>) δ 166.8, 141.3, 137.3, 136.7, 133.6, 132.1, 131.5, 130.6, 129.8, 129.6, 127.7,



126.7, 119.9, 70.6, 37.8, 27.8, 21.0, 19.1. IR (neat):  $\nu = 2962, 1708, 1633, 1492, 1379, 1314, 1169, 1016 \text{ cm}^{-1}$ . HRMS (ESI):  $m/z$ :  $[\text{MH}]^+$  Calculated for  $\text{C}_{21}\text{H}_{25}\text{O}_2\text{S}$ : 341.1575, found 341.1571.

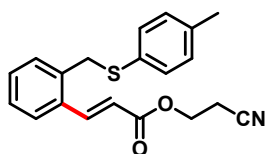

**Cyanoethyl 2-((*p*-tolylthio)methyl)cinnamate (4e)**, the title compound was achieved as a pale yellow oil, 108 mg, 80% yield, eluted with petroleum ether/EtOAc = 5/1.

$^1\text{H}$  NMR (400 MHz,  $\text{CDCl}_3$ , TMS)  $\delta$  8.06 (d,  $J = 16 \text{ Hz}$ , 1H), 7.57-7.53 (m, 1H), 7.29-7.25 (m, 2H), 7.23-7.16 (m, 3H), 7.06 (d,  $J = 8.0 \text{ Hz}$ , 2H), 6.35 (d,  $J = 16 \text{ Hz}$ , 1H), 4.41 (t,  $J = 6.4 \text{ Hz}$ , 2H), 4.14 (s, 2H), 2.77 (t,  $J = 6.4 \text{ Hz}$ , 2H), 2.31 (s, 3H).  $^{13}\text{C}$  NMR (100 MHz,  $\text{CDCl}_3$ )  $\delta$  166.0, 142.9, 137.4, 137.0, 133.1, 132.2, 131.3, 130.8, 129.6, 127.8, 126.8, 118.3, 116.8, 58.7, 37.9, 21.0, 18.1. IR (neat):  $\nu = 2962, 2258, 1716, 1633, 1492, 1314, 1266, 1214, 1166 \text{ cm}^{-1}$ . HRMS (ESI):  $m/z$ :  $[\text{MH}]^+$  Calculated for  $\text{C}_{20}\text{H}_{20}\text{NO}_2\text{S}$ : 338.1215, found 338.1211.

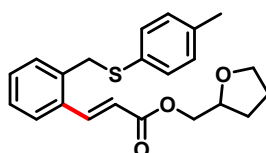

**(Tetrahydrofuran-2-yl)methyl 2-((*p*-tolylthio)methyl)cinnamate (4f)**, the title compound was achieved as a pale yellow oil, 105 mg, 71% yield, eluted with petroleum ether/EtOAc = 20/1.

$^1\text{H}$  NMR (400 MHz,  $\text{CDCl}_3$ , TMS)  $\delta$  8.03 (d,  $J = 15.6 \text{ Hz}$ , 1H), 7.56-7.52 (m, 1H), 7.27-7.16 (m, 5H), 7.05 (d,  $J = 8.0 \text{ Hz}$ , 2H), 6.39 (d,  $J = 16 \text{ Hz}$ , 1H), 4.29 (dd,  $J_1 = 10.8 \text{ Hz}$ ,  $J_2 = 3.2 \text{ Hz}$ , 1H), 4.23-4.12 (m, 2H), 4.13 (s, 2H), 3.94-3.89 (m, 1H), 3.84-3.78 (s, 1H), 2.30 (s, 3H), 2.07-1.98 (m, 1H), 1.97-1.84 (m, 2H), 1.71-1.63 (m, 1H).  $^{13}\text{C}$  NMR (100 MHz,  $\text{CDCl}_3$ )  $\delta$  166.6, 141.7, 137.3, 136.7, 133.5, 132.0, 131.4, 130.6, 129.9, 129.6, 127.7, 126.7, 119.5, 76.5, 68.4, 66.5, 37.9, 28.0, 25.7, 21.0. IR (neat):  $\nu = 2982, 1710, 1634, 1492, 1452, 1313, 1171, 1088 \text{ cm}^{-1}$ . HRMS (ESI):  $m/z$ :  $[\text{MH}]^+$  Calculated for  $\text{C}_{22}\text{H}_{25}\text{O}_3\text{S}$ : 369.1524, found 369.1521.

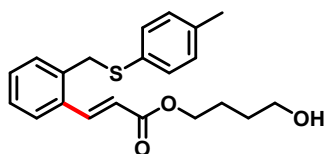

**Hydroxybutyl 2-((*p*-tolylthio)methyl)cinnamate (4g)**, the title compound was achieved as a pale yellow oil, 102 mg, 72% yield, eluted with petroleum ether/EtOAc = 5/1.

$^1\text{H}$  NMR (400 MHz,  $\text{CDCl}_3$ , TMS)  $\delta$  8.01 (d,  $J = 15.6 \text{ Hz}$ , 1H), 7.56-7.52 (m, 1H), 7.27-7.16 (m, 5H), 7.05 (d,  $J = 8.0 \text{ Hz}$ , 2H), 6.33 (d,  $J = 16 \text{ Hz}$ , 1H), 4.24 (t,  $J = 6.4 \text{ Hz}$ , 2H), 4.13 (s, 2H), 3.69 (t,  $J = 6.4 \text{ Hz}$ , 2H), 2.30 (s, 3H), 1.86 (s, 1H), 1.82-1.77 (m, 2H), 1.71-1.64 (m, 2H).  $^{13}\text{C}$  NMR (100 MHz,  $\text{CDCl}_3$ )  $\delta$  166.8, 141.5, 137.4, 136.8, 133.6, 132.1,

131.5, 130.8, 130.0, 129.7, 127.9, 126.8, 119.8, 64.4, 62.4, 38.0, 29.2, 25.2, 21.1. IR (neat):  $\nu = 3417, 2948, 1706, 1633, 1492, 1452, 1314, 1171, 1040 \text{ cm}^{-1}$ . HRMS (ESI):  $m/z$ :  $[\text{MH}]^+$  Calculated for  $\text{C}_{21}\text{H}_{25}\text{O}_3\text{S}$ : 357.1524, found 357.1521.

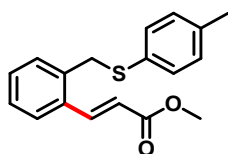

**Methyl 2-((*p*-tolylthio)methyl)cinnamate (4h)**,<sup>[1]</sup> the title compound was achieved as a colorless oil, 80 mg, 67% yield, eluted with petroleum ether/EtOAc = 20/1.

$^1\text{H}$  NMR (400 MHz,  $\text{CDCl}_3$ , TMS)  $\delta$  7.99 (d,  $J = 16 \text{ Hz}$ , 1H), 7.56-7.52 (m, 1H), 7.28-7.16 (m, 5H), 7.06 (d,  $J = 7.6 \text{ Hz}$ , 2H), 6.33 (d,  $J = 16 \text{ Hz}$ , 1H), 4.14 (s, 2H), 3.81 (s, 3H), 2.31 (s, 3H).  $^{13}\text{C}$  NMR (100 MHz,  $\text{CDCl}_3$ )  $\delta$  167.2, 141.6, 137.5, 136.9, 133.6, 132.3, 131.5, 130.8, 130.0, 129.7, 127.8, 126.8, 119.6, 51.7, 38.0, 21.1.

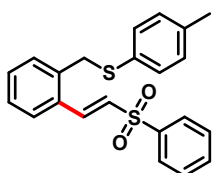

**(*E*)-2-(2-(phenylsulfonyl)vinyl)benzyl *p*-tolyl sulfane (4i)**, the title compound was achieved as a white solid, mp. 65.4-66.3 °C, 106 mg, 70% yield, eluted with petroleum ether/EtOAc = 5/1..

$^1\text{H}$  NMR (400 MHz,  $\text{CDCl}_3$ , TMS)  $\delta$  8.03 (d,  $J = 15.6 \text{ Hz}$ , 1H), 7.97-7.95 (m, 2H), 7.61 (tt,  $J_1 = 7.2 \text{ Hz}$ ,  $J_2 = 2.0 \text{ Hz}$ , 1H), 7.53 (tt,  $J_1 = 8.0 \text{ Hz}$ ,  $J_2 = 1.6 \text{ Hz}$ , 2H), 7.44 (dd,  $J_1 = 7.2 \text{ Hz}$ ,  $J_2 = 1.2 \text{ Hz}$ , 1H), 7.29-7.17 (m, 5H), 7.07 (d,  $J = 8.0 \text{ Hz}$ , 2H), 6.79 (d,  $J = 15.2 \text{ Hz}$ , 1H), 4.14 (s, 2H), 2.32 (s, 3H).  $^{13}\text{C}$  NMR (100 MHz,  $\text{CDCl}_3$ )  $\delta$  140.6, 139.7, 137.6, 137.3, 133.3, 132.1, 131.6, 131.1, 130.9, 130.7, 129.8, 129.3, 128.9, 127.9, 127.7, 127.2, 38.1, 21.1. IR (neat):  $\nu = 2919, 1608, 1493, 1447, 1316, 1304, 1142, 1083 \text{ cm}^{-1}$ . HRMS (ESI):  $m/z$ :  $[\text{MH}]^+$  Calculated for  $\text{C}_{22}\text{H}_{21}\text{O}_2\text{S}_2$ : 381.0983, found 381.0983.

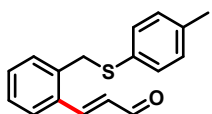

**2-((*p*-tolylthio)methyl)cinnamaldehyde (4j)**, the title compound was achieved as a pale yellow oil, 71 mg, 66% yield, eluted with petroleum ether/EtOAc = 20/1.

$^1\text{H}$  NMR (400 MHz,  $\text{CDCl}_3$ , TMS)  $\delta$  9.57 (d,  $J = 8.0 \text{ Hz}$ , 1H), 7.66 (d,  $J = 15.6 \text{ Hz}$ , 1H), 7.59-7.56 (m, 1H), 7.34-7.28 (m, 2H), 7.24-7.18 (m, 3H), 7.06 (d,  $J = 8.0$ , 2H), 6.58 (dd,  $J_1 = 15.6 \text{ Hz}$ ,  $J_2 = 7.6 \text{ Hz}$ , 1H), 4.14 (s, 2H), 2.31 (s, 3H).  $^{13}\text{C}$  NMR (100 MHz,  $\text{CDCl}_3$ )  $\delta$  193.7, 149.1, 137.9, 137.3, 132.9, 132.4, 131.1, 131.0, 130.9, 129.8, 129.7, 128.0, 126.9, 38.0, 21.0. IR (neat):  $\nu = 2921, 1674, 1620, 1490, 1413, 1323, 1126, 1085 \text{ cm}^{-1}$ . HRMS (ESI):  $m/z$ :  $[\text{MH}]^+$  Calculated for  $\text{C}_{17}\text{H}_{17}\text{OS}$ : 269.1000, found 269.0995.

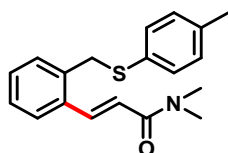

**N,N-dimethyl-2-((p-tolylthio)methyl)cinnamamide (4k)**, the title compound was achieved as a pale yellow oil, 95 mg, 71% yield, eluted with petroleum ether/EtOAc = 5/1. <sup>1</sup>H NMR (400 MHz, CDCl<sub>3</sub>, TMS) δ 7.99 (d, *J* = 15.2 Hz, 1H), 7.54-7.51 (m, 1H), 7.26-7.18 (m, 5H), 7.05 (d, *J* = 8.0 Hz, 2H), 6.81 (d, *J* = 15.2 Hz, 1H), 4.17 (s, 2H), 3.14 (s, 3H), 3.06 (s, 3H), 2.30 (s, 3H). <sup>13</sup>C NMR (100 MHz, CDCl<sub>3</sub>) δ 166.5, 139.2, 136.9, 136.2, 134.7, 131.9, 131.4, 130.6, 129.6, 129.1, 127.6, 126.9, 119.9, 37.7, 37.4, 35.8, 21.0. IR (neat): ν = 2927, 1648, 1608, 1491, 1454, 1394, 1212, 1139 cm<sup>-1</sup>. HRMS (ESI): *m/z*: [MH]<sup>+</sup> Calculated for C<sub>19</sub>H<sub>22</sub>NOS: 312.1422, found 312.1418.

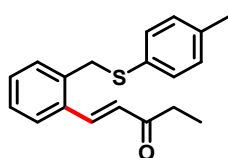

**(E)-2-(3-oxopent-1-en-1-yl)benzyl p-tolyl sulfane (4l)**, the title compound was achieved as a pale yellow oil, 92 mg, 77% yield, eluted with petroleum ether/EtOAc = 20/1. <sup>1</sup>H NMR (400 MHz, CDCl<sub>3</sub>, TMS) δ 7.85 (d, *J* = 16.4 Hz, 1H), 7.59-7.54 (m, 1H), 7.29-7.25 (m, 2H), 7.23-7.17 (m, 3H), 7.06 (d, *J* = 8.0 Hz, 2H), 6.61 (d, *J* = 16 Hz, 1H), 4.14 (s, 2H), 2.65 (q, *J* = 7.2 Hz, 2H), 2.31 (s, 3H), 1.16 (t, *J* = 7.2 Hz, 3H). <sup>13</sup>C NMR (100 MHz, CDCl<sub>3</sub>) δ 200.8, 139.0, 137.4, 137.0, 133.7, 132.0, 131.5, 130.7, 129.9, 129.6, 127.8, 127.8, 126.6, 38.1, 33.7, 21.0, 8.1. IR (neat): ν = 2976, 1639, 1611, 1492, 1454, 1265, 1192, 1120 cm<sup>-1</sup>. HRMS (ESI): *m/z*: [MH]<sup>+</sup> Calculated for C<sub>19</sub>H<sub>21</sub>OS: 297.1313, found 297.1309.

## 7, General procedure for thioether directed di-alkenylation

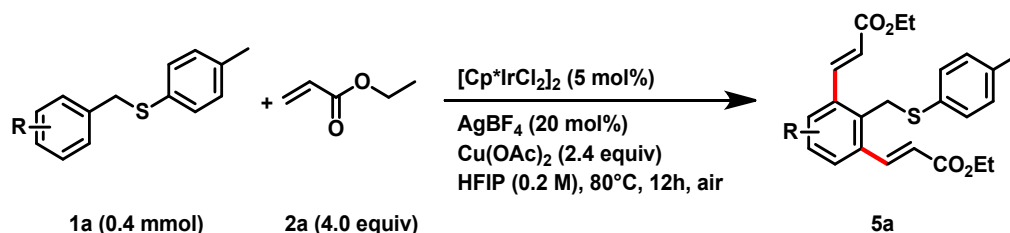

To a 35 mL screw-top sealed tube equipped with stir bar, was added sulfur ethers **1a** (0.4 mmol), ethyl acrylate **2a** (1.6 mmol), [Cp\*IrCl<sub>2</sub>]<sub>2</sub> (16 mg, 5 mol%), AgBF<sub>4</sub> (15.8 mg, 20 mol%) and Cu(OAc)<sub>2</sub> (173.7 mg, 2.4 equiv) in HFIP (2 mL) *via* a syringe. The tube was then tightly capped. The reaction mixture was placed in a preheated oil-bath, and stirred at 80 °C for 12 h. When cooled to room temperature, the reaction mixture was quenched with water (10 mL) and extracted with ethyl acetate (3 x 20 mL). The combined organic layers was washed with brine and dried over anhydrous Na<sub>2</sub>SO<sub>4</sub>. The solvent was removed under the reduced pressure, the residue was subjected to flash column chromatography on silica gel to provide the desired product **5a**.

## 8, Characterization data for di-alkenylation products

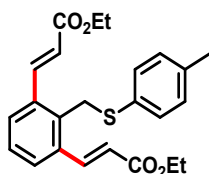

**(2E,2'E)-diethyl 3,3'-(2-((p-tolylthio)methyl)-1,3-phenylene)diacrylate (5a)**,<sup>[8]</sup> the title compound was achieved as a pale yellow solid, mp. 100-101 °C, 134 mg, 82% yield, eluted with petroleum ether/EtOAc = 5/1.

<sup>1</sup>H NMR (400 MHz, CDCl<sub>3</sub>, TMS) δ 7.93 (d, *J* = 15.6 Hz, 2H), 7.47 (d, *J* = 7.6 Hz, 2H), 7.23 (d, *J* = 8.0 Hz, 3H), 7.00 (d, *J* = 8.0 Hz, 2H), 6.22 (d, *J* = 15.6 Hz, 2H), 4.22 (q, *J* = 7.2 Hz, 4H), 4.15 (s, 2H), 2.27 (s, 3H), 1.30 (t, *J* = 7.2 Hz, 6H). <sup>13</sup>C NMR (100 MHz, CDCl<sub>3</sub>) δ 166.5, 141.5, 138.3, 135.3, 133.8, 130.7, 129.8, 128.4, 127.8, 121.5, 60.7, 34.7, 21.2, 14.4.

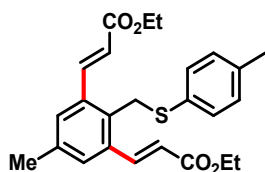

**(2E,2'E)-diethyl 3,3'-(5-methyl-2-((p-tolylthio)methyl)-1,3-phenylene)diacrylate (5b)**,<sup>[8]</sup> the title compound was achieved as a pale yellow oil, 137 mg, 81% yield, eluted with petroleum ether/EtOAc = 5/1.

<sup>1</sup>H NMR (400 MHz, CDCl<sub>3</sub>, TMS) δ 7.96 (d, *J* = 15.6 Hz, 2H), 7.34 (s, 2H), 7.28 (d, *J* = 8.0 Hz, 2H), 7.05 (d, *J* = 8.0 Hz, 2H), 6.27 (d, *J* = 16 Hz, 2H), 4.26 (q, *J* = 7.2 Hz, 4H), 4.17 (s, 2H), 2.35 (s, 3H), 2.31 (s, 3H), 1.34 (t, *J* = 7.2 Hz, 6H). <sup>13</sup>C NMR (100 MHz, CDCl<sub>3</sub>) δ 166.6, 141.6, 137.9, 137.6, 134.9, 133.5, 132.5, 130.8, 129.8, 129.2, 121.2, 60.6, 34.5, 29.6, 21.0, 14.2.

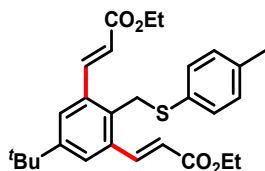

**(2E,2'E)-diethyl 3,3'-(5-(tert-butyl)-2-((p-tolylthio)methyl)-1,3-phenylene)diacrylate (5c)**, the title compound was achieved as a pale yellow solid, mp. 90-91 °C, 148 mg, 80% yield, eluted with petroleum ether/EtOAc = 5/1.

<sup>1</sup>H NMR (400 MHz, CDCl<sub>3</sub>, TMS) δ 8.02 (d, *J* = 15.6 Hz, 2H), 7.55 (s, 2H), 7.31 (d, *J* = 8.0 Hz, 2H), 7.07 (d, *J* = 8.0 Hz, 2H), 6.31 (d, *J* = 15.6 Hz, 2H), 4.27 (q, *J* = 7.2 Hz, 4H), 4.19 (s, 2H), 2.32 (s, 3H), 1.35 (t, *J* = 7.2 Hz, 6H), 1.33 (s, 9H). <sup>13</sup>C NMR (100 MHz, CDCl<sub>3</sub>) δ 166.6, 150.9, 142.2, 138.1, 134.9, 133.3, 132.3, 131.2, 129.8, 125.7, 121.2, 60.7,

34.8, 34.6, 31.2, 21.2, 14.4. IR (neat):  $\nu = 2964, 1706, 1634, 1466, 1364, 1316, 1173, 1095 \text{ cm}^{-1}$ . HRMS (ESI):  $m/z$ :  $[\text{MH}]^+$  Calculated for  $\text{C}_{28}\text{H}_{35}\text{O}_4\text{S}$ : 467.2256, found 467.2252.

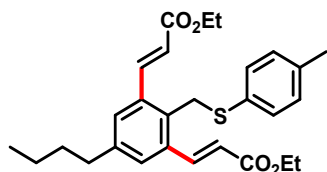

**(2E,2'E)-diethyl 3,3'-(5-butyl-2-(*p*-tolylthio)methyl)-1,3-phenylene)diacrylate (5d)**, the title compound was achieved as a pale yellow oil, 151 mg, 80% yield, eluted with petroleum ether/EtOAc = 10/1.

$^1\text{H}$  NMR (400 MHz,  $\text{CDCl}_3$ , TMS)  $\delta$  7.98 (d,  $J = 15.6 \text{ Hz}$ , 2H), 7.34 (s, 2H), 7.28 (d,  $J = 8.0 \text{ Hz}$ , 2H), 7.04 (d,  $J = 8.0 \text{ Hz}$ , 2H), 6.28 (d,  $J = 15.6 \text{ Hz}$ , 2H), 4.26 (q,  $J = 7.2 \text{ Hz}$ , 4H), 4.18 (s, 2H), 2.60 (t,  $J = 7.6 \text{ Hz}$ , 2H), 2.31 (s, 3H), 1.63-1.55 (m, 2H), 1.38-1.30 (m, 2H), 1.34 (t,  $J = 6.8 \text{ Hz}$ , 6H), 0.93 (t,  $J = 7.2 \text{ Hz}$ , 3H).  $^{13}\text{C}$  NMR (100 MHz,  $\text{CDCl}_3$ )  $\delta$  166.6, 142.6, 141.7, 138.1, 135.1, 133.5, 132.6, 130.9, 129.8, 128.6, 121.1, 60.6, 35.3, 34.5, 33.4, 22.3, 21.2, 14.4, 13.9. IR (neat):  $\nu = 2948, 1703, 1630, 1492, 1472, 1366, 1174, 1164 \text{ cm}^{-1}$ . HRMS (ESI):  $m/z$ :  $[\text{MH}]^+$  Calculated for  $\text{C}_{28}\text{H}_{35}\text{O}_4\text{S}$ : 467.2256, found 467.2254.

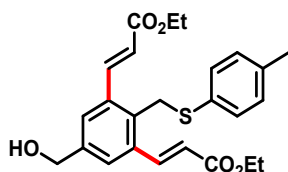

**(2E,2'E)-diethyl 3,3'-(5-(hydroxymethyl)-2-(*p*-tolylthio)methyl)-1,3-phenylene)diacrylate (5e)**, the title compound was achieved as a pale yellow solid, mp. 110-113  $^\circ\text{C}$ , 126 mg, 71% yield, eluted with petroleum ether/EtOAc = 2/1.

$^1\text{H}$  NMR (400 MHz,  $\text{CDCl}_3$ , TMS)  $\delta$  7.96 (d,  $J = 15.6 \text{ Hz}$ , 2H), 7.52 (s, 2H), 7.27 (d,  $J = 8.0 \text{ Hz}$ , 2H), 7.04 (d,  $J = 8.0 \text{ Hz}$ , 2H), 6.29 (d,  $J = 16 \text{ Hz}$ , 2H), 4.71 (s, 2H), 4.26 (q,  $J = 7.2 \text{ Hz}$ , 4H), 4.17 (s, 2H), 2.31 (s, 3H), 2.05 (s, 1H), 1.34 (t,  $J = 7.2 \text{ Hz}$ , 6H).  $^{13}\text{C}$  NMR (100 MHz,  $\text{CDCl}_3$ )  $\delta$  166.6, 141.4, 140.7, 138.3, 135.4, 134.4, 133.6, 130.7, 129.8, 126.7, 121.5, 64.4, 60.7, 34.5, 21.2, 14.3. IR (neat):  $\nu = 3397, 2956, 1706, 1630, 1492, 1447, 1363, 1181, 1037 \text{ cm}^{-1}$ . HRMS (ESI):  $m/z$ :  $[\text{MH}]^+$  Calculated for  $\text{C}_{25}\text{H}_{29}\text{O}_5\text{S}$ : 441.1736, found 441.1731.

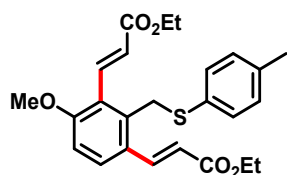

**(2E,2'E)-diethyl 3,3'-(4-methoxy-2-(*p*-tolylthio)methyl)-1,3-phenylene)diacrylate (5f)**, the title compound was achieved as a pale yellow oil, 132 mg, 75% yield, eluted with petroleum ether/EtOAc = 5/1.

$^1\text{H}$  NMR (400 MHz,  $\text{CDCl}_3$ , TMS)  $\delta$  8.02 (d,  $J = 15.6$  Hz, 1H), 7.87 (d,  $J = 16.4$  Hz, 1H), 7.53 (d,  $J = 8.8$  Hz, 1H), 7.36 (d,  $J = 8.0$  Hz, 2H), 7.08 (d,  $J = 8.0$  Hz, 2H), 6.86 (d,  $J = 8.8$  Hz, 1H), 6.67 (d,  $J = 16$  Hz, 1H), 6.22 (d,  $J = 15.6$  Hz, 1H), 4.26 (q,  $J = 6.8$  Hz, 2H), 4.25 (q,  $J = 6.8$  Hz, 2H), 4.19 (s, 2H), 3.87 (s, 3H), 2.32 (s, 3H), 1.33 (t,  $J = 7.2$  Hz, 3H), 1.33 (t,  $J = 7.2$  Hz, 3H).  $^{13}\text{C}$  NMR (100 MHz,  $\text{CDCl}_3$ )  $\delta$  167.2, 166.9, 159.7, 141.6, 137.9, 136.5, 133.0, 131.3, 129.9, 128.9, 127.5, 124.6, 124.1, 123.9, 118.8, 110.5, 60.5, 60.3, 55.8, 35.8, 21.2, 14.4. IR (neat):  $\nu = 2980, 1706, 1630, 1471, 1365, 1314, 1181, 1159$   $\text{cm}^{-1}$ . HRMS (ESI):  $m/z$ :  $[\text{MH}]^+$  Calculated for  $\text{C}_{25}\text{H}_{29}\text{O}_5\text{S}$ : 441.1736, found 441.1730.

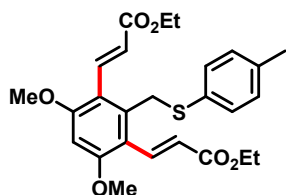

**(2E,2'E)-diethyl 3,3'-(4,6-dimethoxy-2-(*p*-tolylthio)methyl)-1,3-phenylene)diacrylate (5g)**, the title compound was achieved as a pale yellow oil, 166 mg, 88% yield, eluted with petroleum ether/EtOAc = 5/1.

$^1\text{H}$  NMR (400 MHz,  $\text{CDCl}_3$ , TMS)  $\delta$  7.95 (d,  $J = 16$  Hz, 2H), 7.43 (d,  $J = 8.0$  Hz, 2H), 7.11 (d,  $J = 7.6$  Hz, 2H), 6.69 (d,  $J = 16$  Hz, 2H), 6.45 (s, 1H), 4.25 (q,  $J = 7.2$  Hz, 4H), 4.20 (s, 2H), 3.90 (s, 6H), 2.33 (s, 3H), 1.33 (t,  $J = 7.2$  Hz, 6H).  $^{13}\text{C}$  NMR (100 MHz,  $\text{CDCl}_3$ )  $\delta$  167.8, 160.7, 138.3, 137.9, 137.7, 132.8, 131.7, 129.9, 122.4, 116.6, 94.5, 60.3, 55.7, 36.9, 21.2, 14.4. IR (neat):  $\nu = 2974, 1702, 1615, 1465, 1401, 1308, 1172, 1141$   $\text{cm}^{-1}$ . HRMS (ESI):  $m/z$ :  $[\text{MH}]^+$  Calculated for  $\text{C}_{26}\text{H}_{31}\text{O}_6\text{S}$ : 471.1841, found 471.1834.

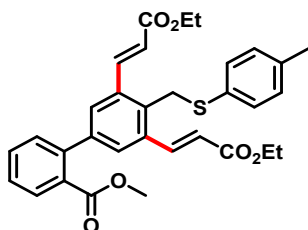

**(2E,2'E)-diethyl 3,3'-(2'-(methoxycarbonyl)-4-(*p*-tolylthio)methyl)-[1,1'-biphenyl]-3,5-diyl)diacrylate (5h)**, the title compound was achieved as a white solid, mp. 115-117  $^{\circ}\text{C}$ , 174 mg, 80% yield, eluted with petroleum ether/EtOAc = 2/1.

$^1\text{H}$  NMR (400 MHz,  $\text{CDCl}_3$ , TMS)  $\delta$  8.00 (d,  $J = 16$  Hz, 2H), 7.89 (dd,  $J_1 = 8.0$  Hz,  $J_2 = 1.2$  Hz, 1H), 7.56 (tt,  $J_1 = 7.6$  Hz,  $J_2 = 1.2$  Hz, 1H), 7.47 (s, 2H), 7.45 (tt,  $J_1 = 9.6$  Hz,  $J_2 = 1.2$  Hz, 1H), 7.35 (d,  $J = 7.6$  Hz, 1H), 7.30 (d,  $J = 8.0$  Hz, 2H), 7.06 (d,  $J = 8.0$  Hz, 2H), 6.27 (d,  $J = 15.6$  Hz, 2H), 4.27 (q,  $J = 7.2$  Hz, 4H), 4.23 (s, 2H), 3.68 (s, 3H), 2.31 (s, 3H), 1.33 (t,  $J = 7.2$  Hz, 6H).  $^{13}\text{C}$  NMR (100 MHz,  $\text{CDCl}_3$ )  $\delta$  168.4, 166.5, 141.3, 141.0, 140.9, 138.4, 134.9, 134.2, 133.9, 131.7, 130.7, 130.6, 130.4, 130.2, 129.8, 128.4, 127.9, 121.6, 60.6, 52.2, 34.6, 21.2, 14.3. IR (neat):  $\nu = 2984, 1709, 1632, 1492, 1439, 1367, 1173, 1091$   $\text{cm}^{-1}$ . HRMS (ESI):  $m/z$ :  $[\text{MH}]^+$  Calculated for  $\text{C}_{32}\text{H}_{33}\text{O}_6\text{S}$ : 545.1998, found 545.1988.

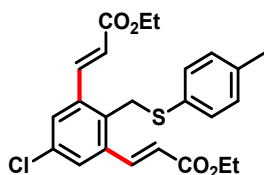

**(2E,2'E)-diethyl 3,3'-(5-chloro-2-((p-tolylthio)methyl)-1,3-phenylene)diacrylate (5i)**,<sup>[8]</sup> the title compound was achieved as a white solid, mp. 96-97 °C, 121 mg, 68% yield, eluted with petroleum ether/EtOAc = 5/1.

<sup>1</sup>H NMR (400 MHz, CDCl<sub>3</sub>, TMS) δ 7.85 (d, *J* = 16 Hz, 2H), 7.46 (s, 2H), 7.24 (d, *J* = 8.0 Hz, 2H), 7.04 (d, *J* = 8.0 Hz, 2H), 6.23 (d, *J* = 15.6 Hz, 2H), 4.26 (q, *J* = 7.2 Hz, 4H), 4.11 (s, 2H), 2.31 (s, 3H), 1.34 (t, *J* = 7.2 Hz, 6H). <sup>13</sup>C NMR (100 MHz, CDCl<sub>3</sub>) δ 166.1, 140.2, 138.6, 136.9, 134.1, 133.9, 133.8, 130.1, 129.9, 127.9, 122.5, 60.8, 34.4, 21.2, 14.4.

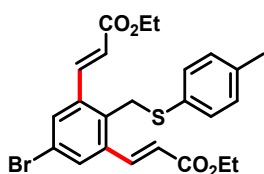

**(2E,2'E)-diethyl 3,3'-(5-bromo-2-((p-tolylthio)methyl)-1,3-phenylene)diacrylate (5j)**, the title compound was achieved as a pale yellow oil, 132 mg, 68% yield, eluted with petroleum ether/EtOAc = 5/1.

<sup>1</sup>H NMR (400 MHz, CDCl<sub>3</sub>, TMS) δ 7.84 (d, *J* = 15.6 Hz, 2H), 7.61 (s, 2H), 7.24 (d, *J* = 8.0 Hz, 2H), 7.03 (d, *J* = 8.0 Hz, 2H), 6.23 (d, *J* = 16 Hz, 2H), 4.26 (q, *J* = 7.2 Hz, 4H), 4.10 (s, 2H), 2.30 (s, 3H), 1.34 (t, *J* = 7.2 Hz, 6H). <sup>13</sup>C NMR (100 MHz, CDCl<sub>3</sub>) δ 166.1, 140.0, 138.6, 137.2, 134.4, 134.1, 130.9, 130.1, 129.9, 122.6, 121.8, 60.8, 34.5, 21.2, 14.4. IR (neat): ν = 2924, 1713, 1635, 1493, 1365, 1309, 1176, 1081 cm<sup>-1</sup>. HRMS (ESI): *m/z*: [MH]<sup>+</sup> Calculated for C<sub>24</sub>H<sub>26</sub>BrO<sub>4</sub>S: 489.0735, found 489.0737.

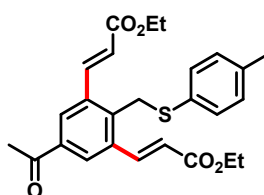

**(2E,2'E)-diethyl 3,3'-(5-acetyl-2-((p-tolylthio)methyl)-1,3-phenylene)diacrylate (5k)**, the title compound was achieved as a white oil, 148 mg, 81% yield, eluted with petroleum ether/EtOAc = 2/1.

<sup>1</sup>H NMR (400 MHz, CDCl<sub>3</sub>, TMS) δ 8.04 (s, 2H), 7.90 (d, *J* = 15.6 Hz, 2H), 7.22 (d, *J* = 8.0 Hz, 2H), 7.02 (d, *J* = 8.0 Hz, 2H), 6.31 (d, *J* = 15.6 Hz, 2H), 4.27 (q, *J* = 7.2 Hz, 4H), 4.17 (s, 2H), 2.62 (s, 3H), 2.30 (s, 3H), 1.34 (t, *J* = 7.2 Hz, 6H). <sup>13</sup>C NMR (100 MHz, CDCl<sub>3</sub>) δ 196.8, 166.2, 140.6, 140.1, 138.8, 136.2, 135.8, 134.3, 129.9, 129.7, 127.8, 122.5, 60.8, 34.7, 26.6, 21.2, 14.3. IR (neat): ν = 2974, 1702, 1682, 1629, 1488, 1429, 1366, 1174, 1038 cm<sup>-1</sup>. HRMS (ESI): *m/z*: [MH]<sup>+</sup> Calculated for C<sub>26</sub>H<sub>29</sub>O<sub>5</sub>S: 453.1736, found 453.1733.

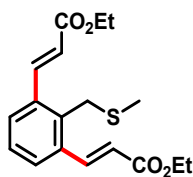

**(2E,2'E)-diethyl 3,3'-(2-((methylthio)methyl)-1,3-phenylene)diacrylate (5I)**,<sup>[8]</sup> the title compound was achieved as a pale yellow oil, 96 mg, 71% yield, eluted with petroleum ether/EtOAc = 5/1.

<sup>1</sup>H NMR (400 MHz, CDCl<sub>3</sub>, TMS) δ 8.08 (d, *J* = 16 Hz, 2H), 7.54 (d, *J* = 8.0 Hz, 2H), 7.27 (t, *J* = 7.6 Hz, 1H), 6.36 (d, *J* = 15.6 Hz, 2H), 4.26 (q, *J* = 7.2 Hz, 4H), 3.90 (s, 2H), 2.12 (s, 3H), 1.32 (t, *J* = 7.2 Hz, 6H). <sup>13</sup>C NMR (100 MHz, CDCl<sub>3</sub>) δ 166.6, 141.8, 135.8, 134.9, 128.5, 127.8, 121.6, 60.7, 31.6, 15.9, 14.3.

## 9, References

1. Yu, M.; Xie, Y.; Xie, C.; Zhang, Y. *Org. Lett.* **2012**, *14*, 2164.
2. Li, Y.; Pu, J.; Jiang, X. *Org. Lett.* **2014**, *16*, 2692.
3. Miyazaki, T.; Kasai, S.; Ogiwara, Y.; Sakai, N. *Eur. J. Org. Chem.* **2016**, *2016*, 1043.
4. Santoni, G.; Mba, M.; Bonchio, M.; Nugent, W. A.; Zonta, C.; Licini, G. *Chem. Eur. J.* **2010**, *16*, 645.
5. Yao, J.; Yu, M.; Zhang, Y. *Adv. Synth. Catal.* **2012**, *354*, 3205.
6. El-Hegazy, F. E.-Z. M.; El-Bardan, A. A.; Hamed, E. A. *Phosphorus, Sulfur Silicon Relat. Elem.* **1994**, *88*, 113.
7. Huang, H.; Kang, J. Y. *Org. Lett.* **2017**, *19*, 544.
8. Zhang, X.-S.; Zhu, Q.-L.; Zhang, Y.-F.; Li, Y.-B.; Shi, Z.-J. *Chem. Eur. J.* **2013**, *19*, 11898.



# 10, <sup>1</sup>H NMR, <sup>13</sup>C NMR and <sup>19</sup>F spectra

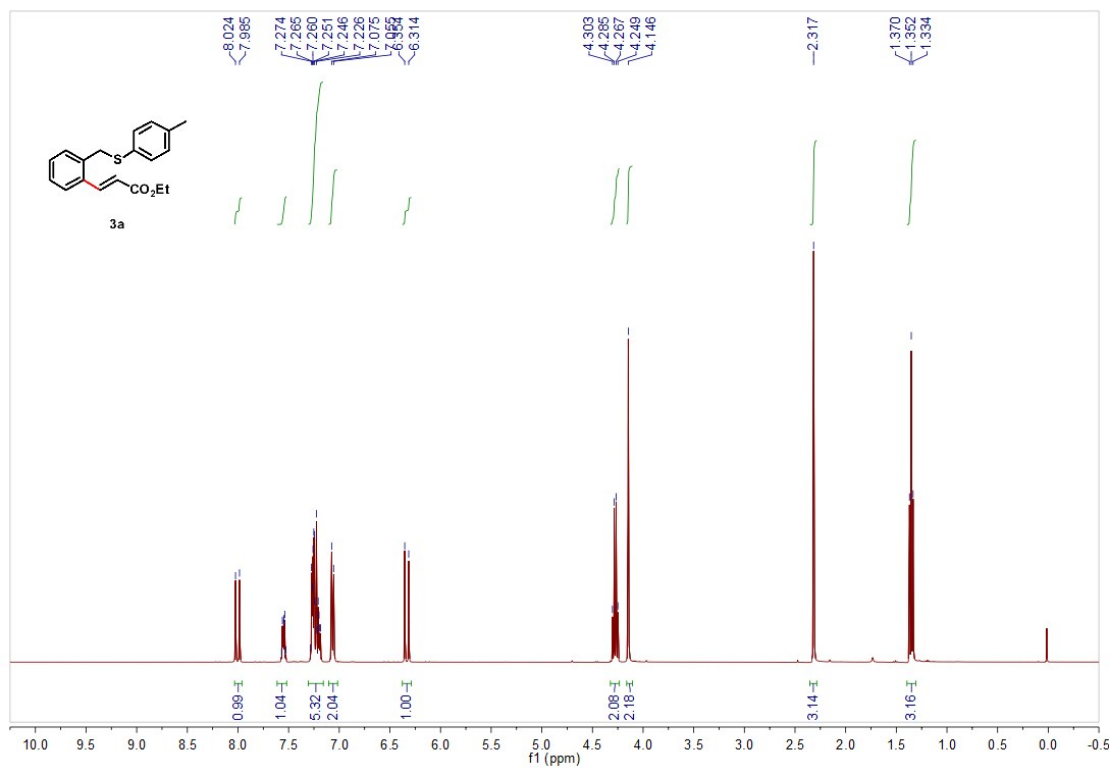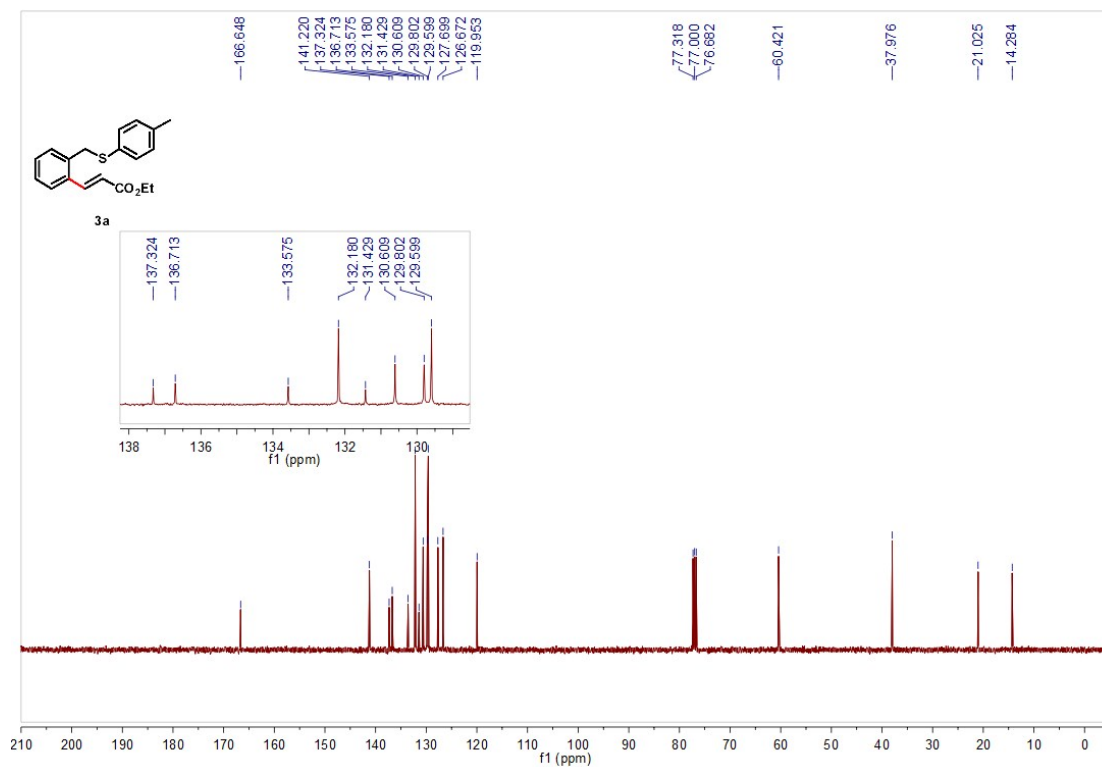

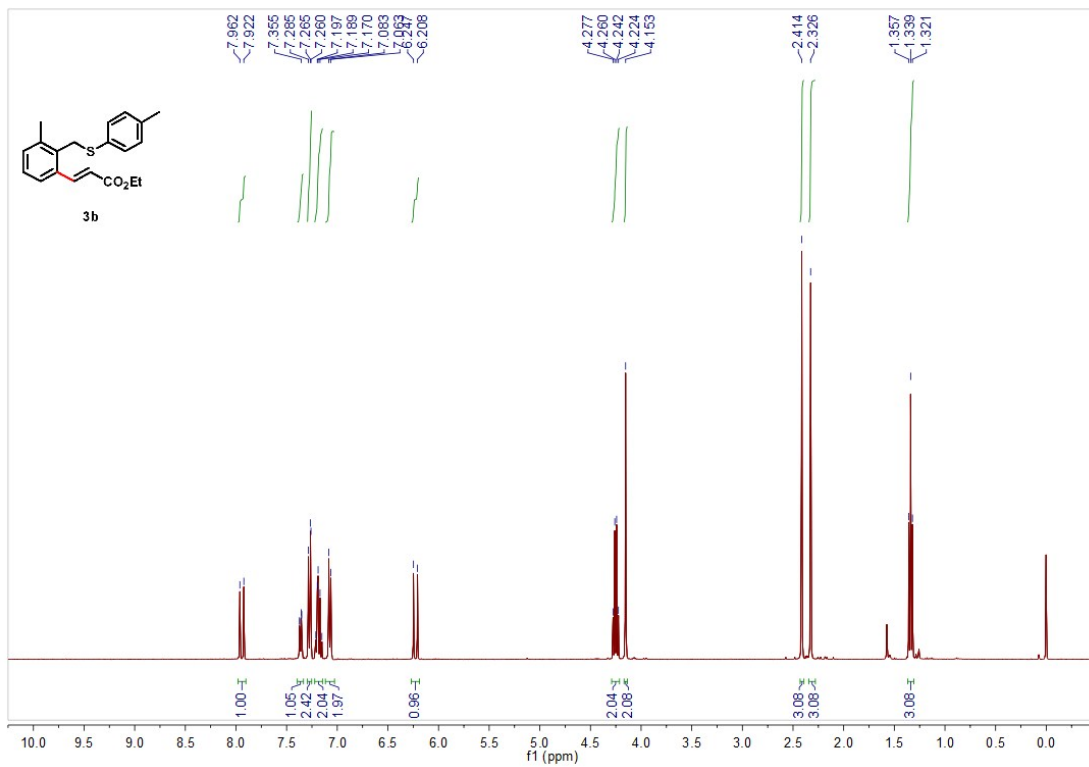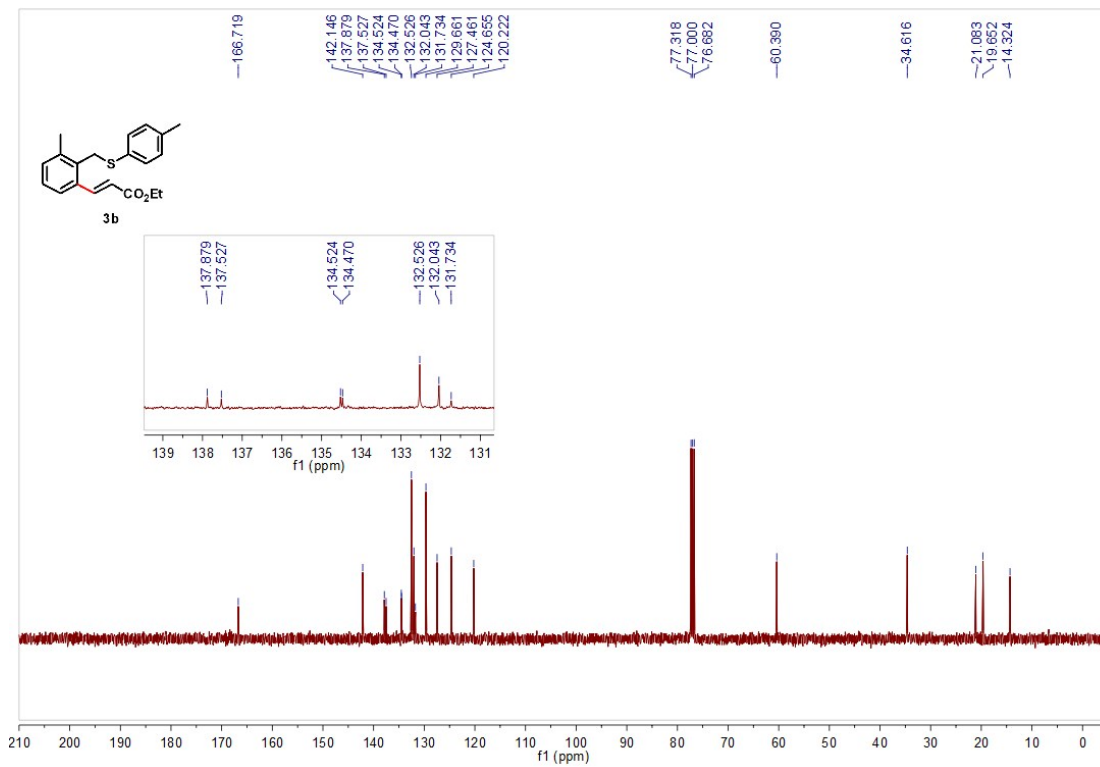

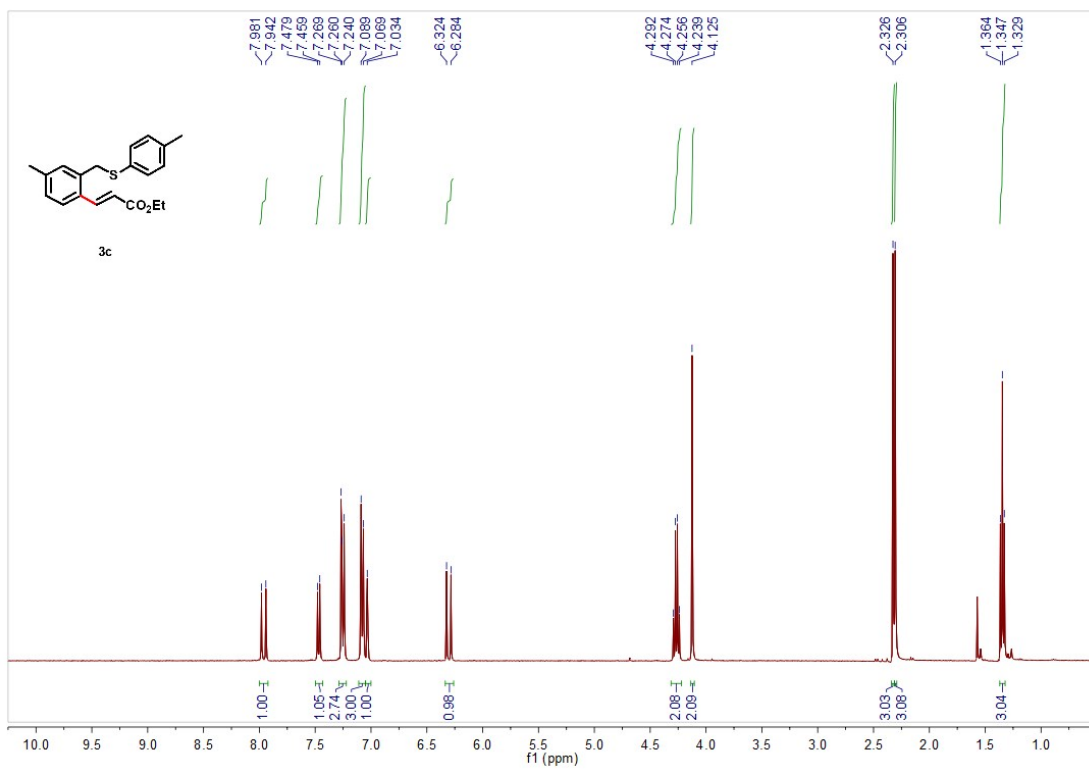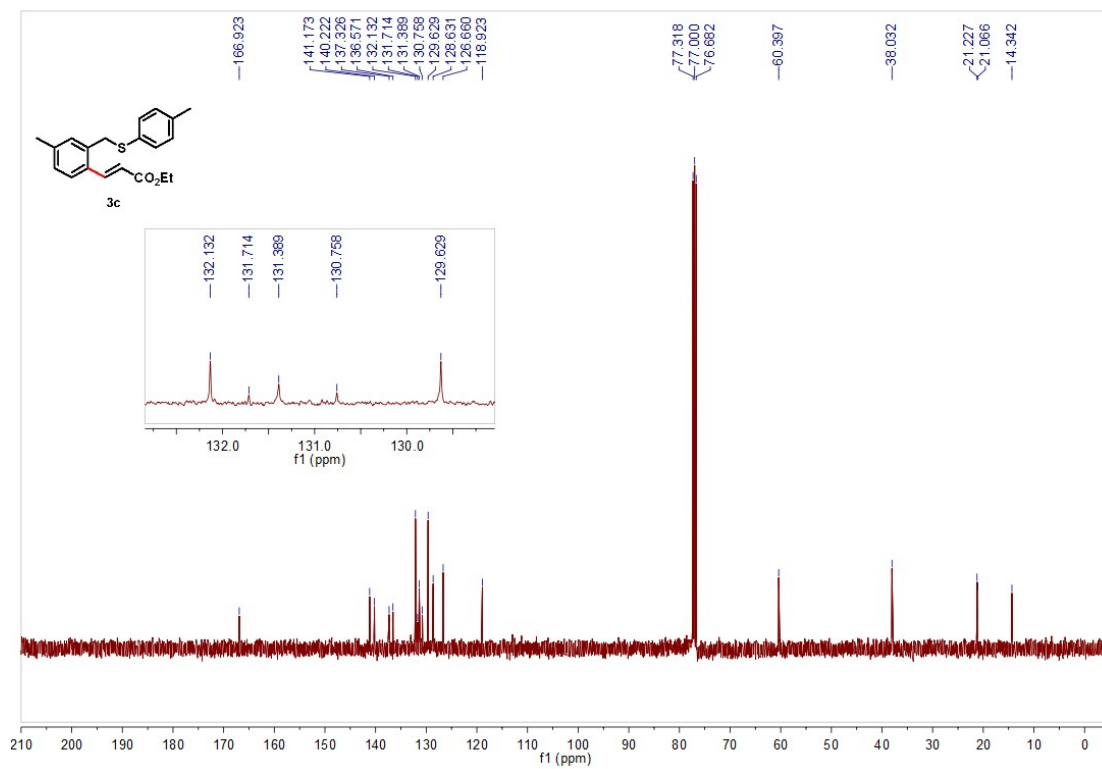

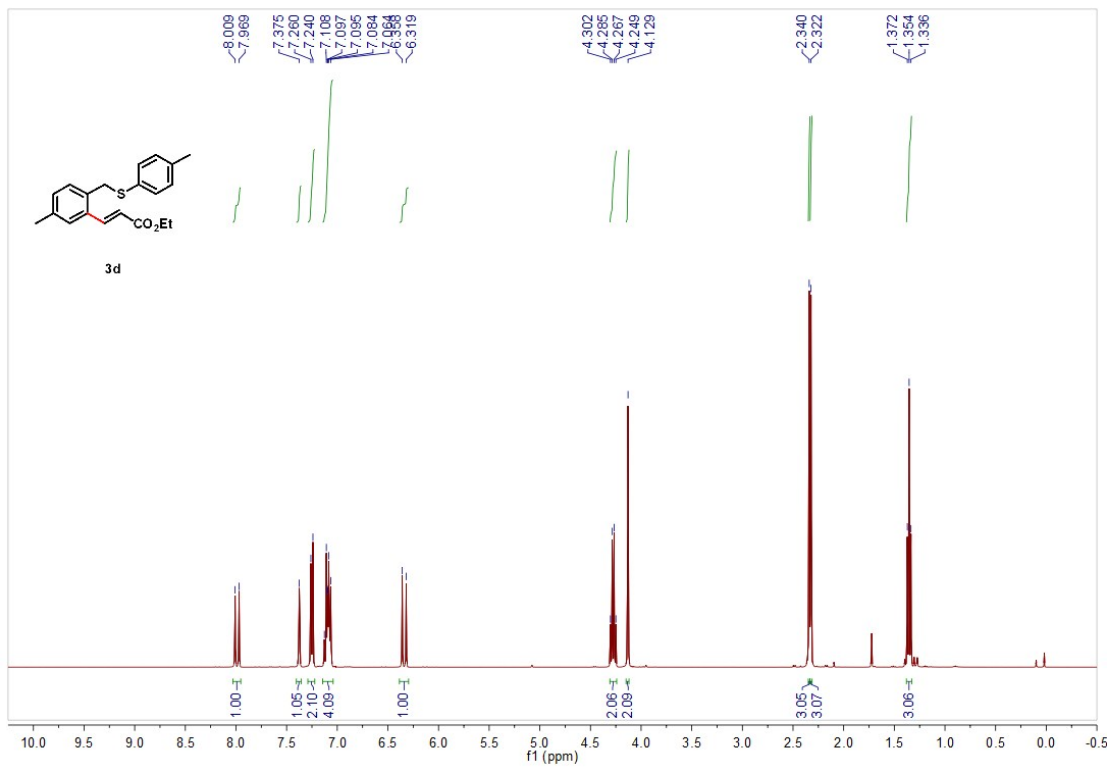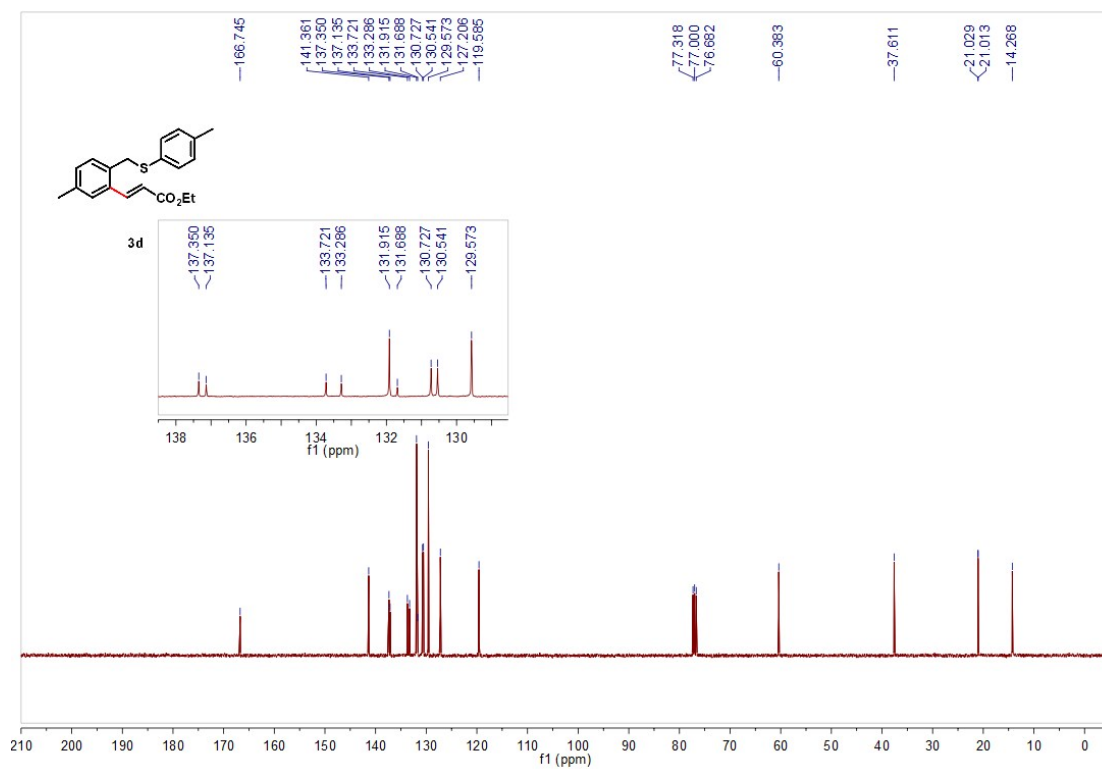

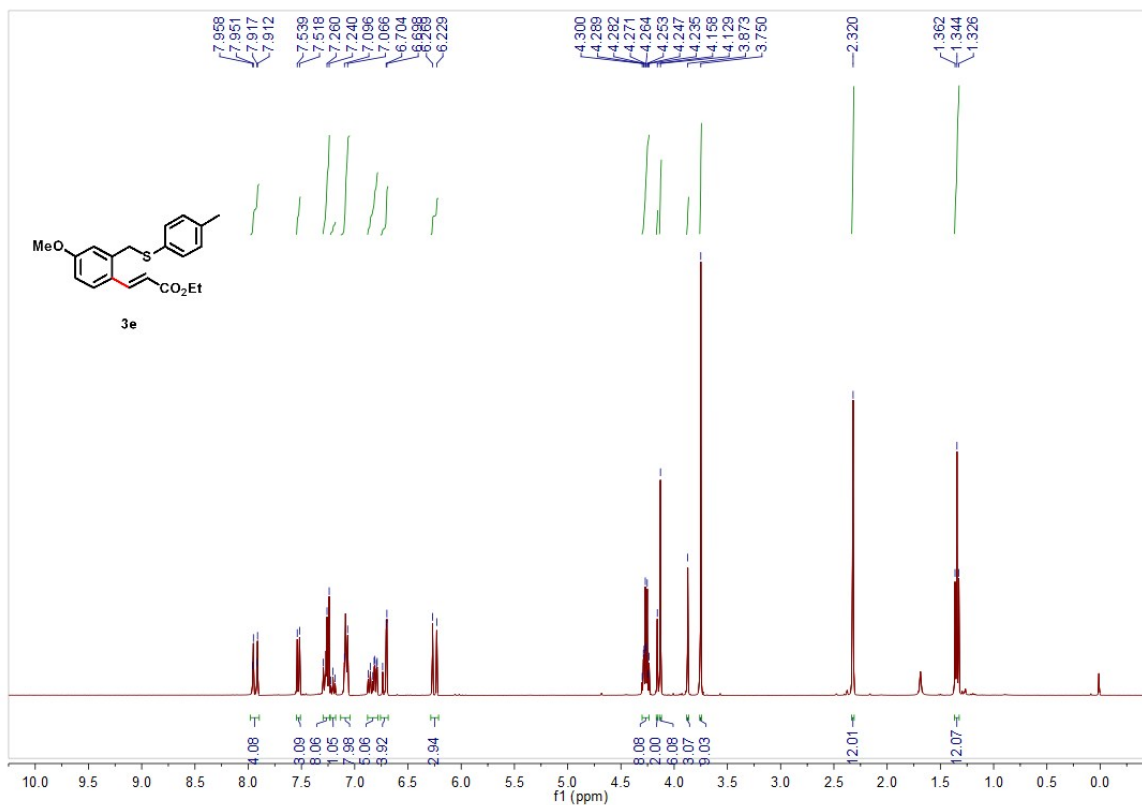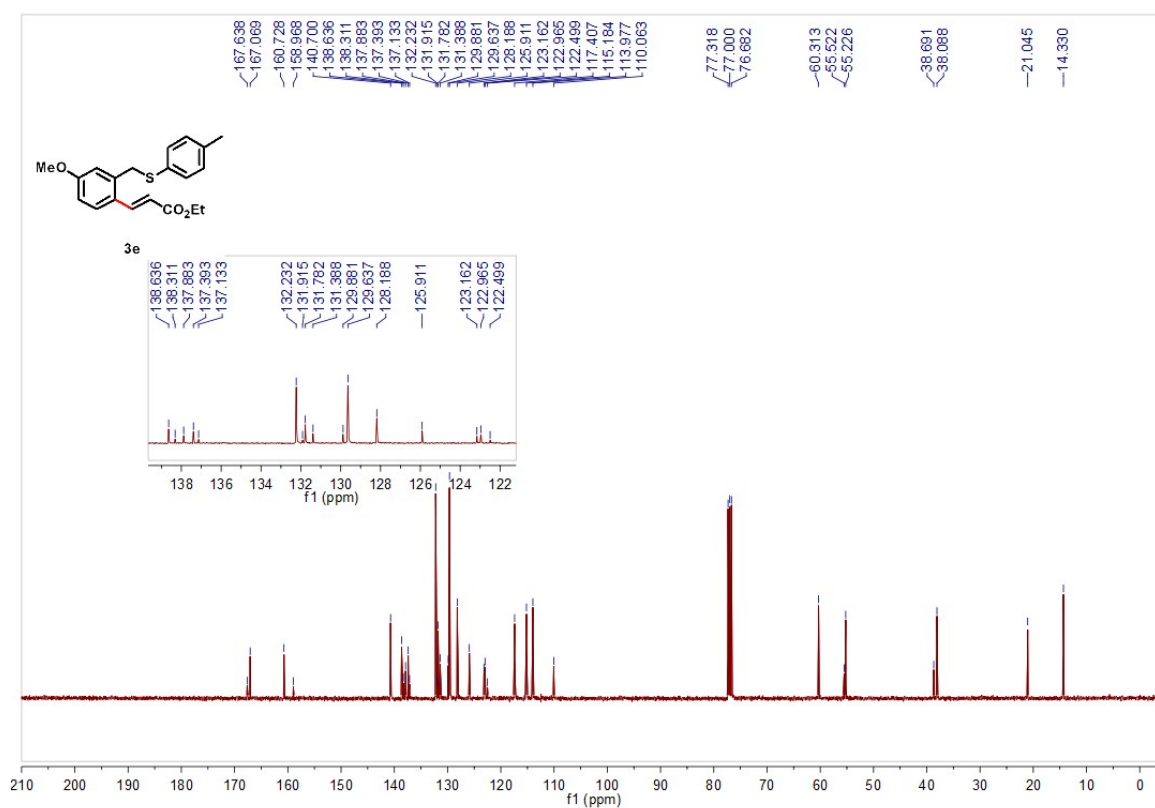

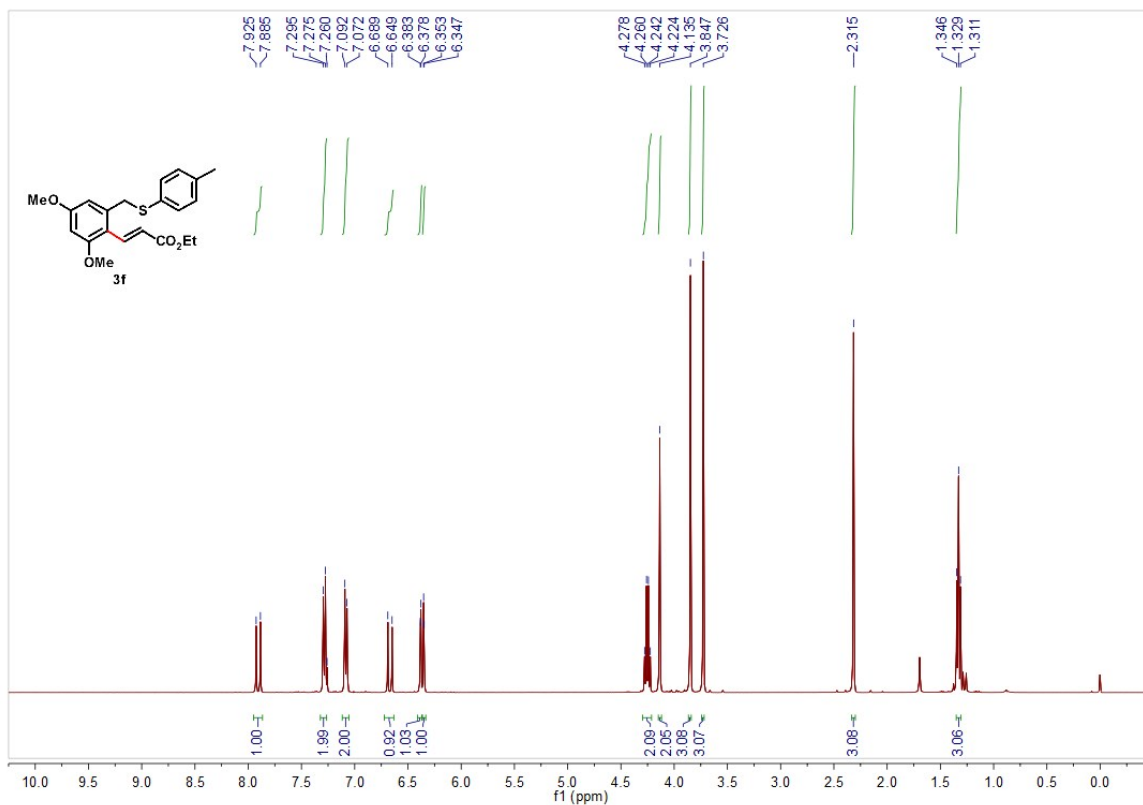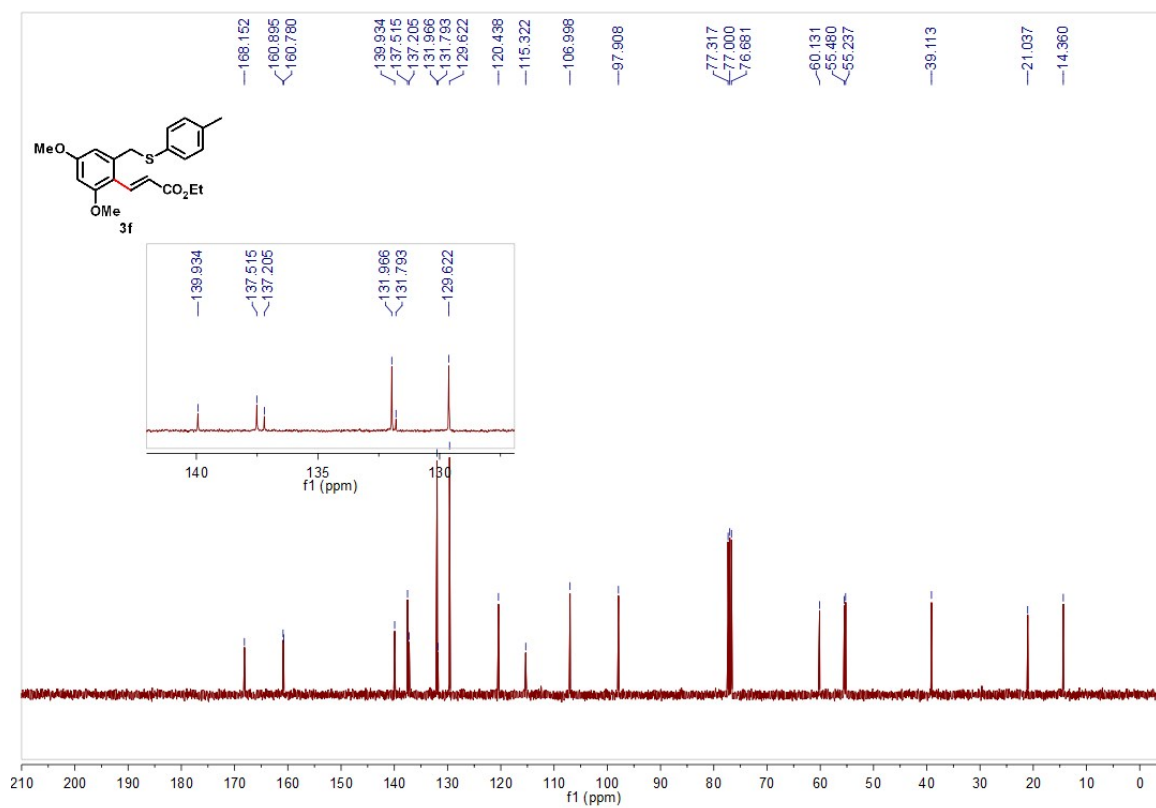

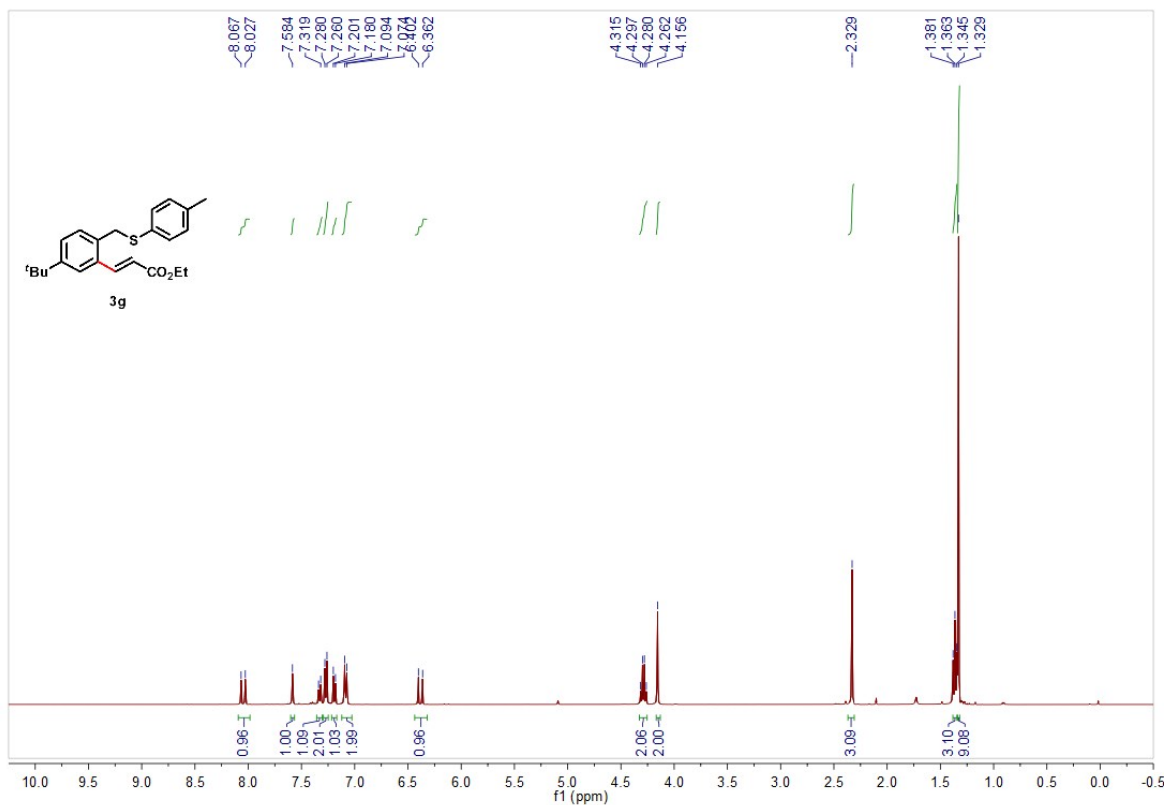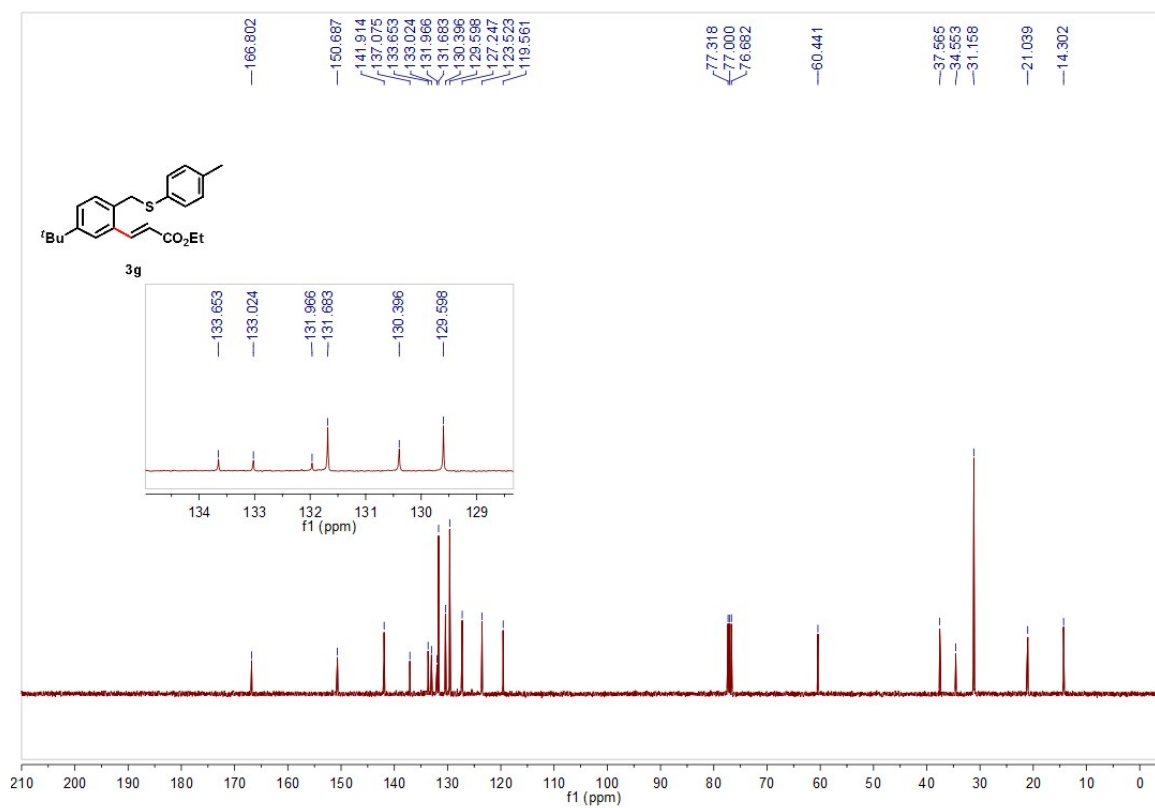

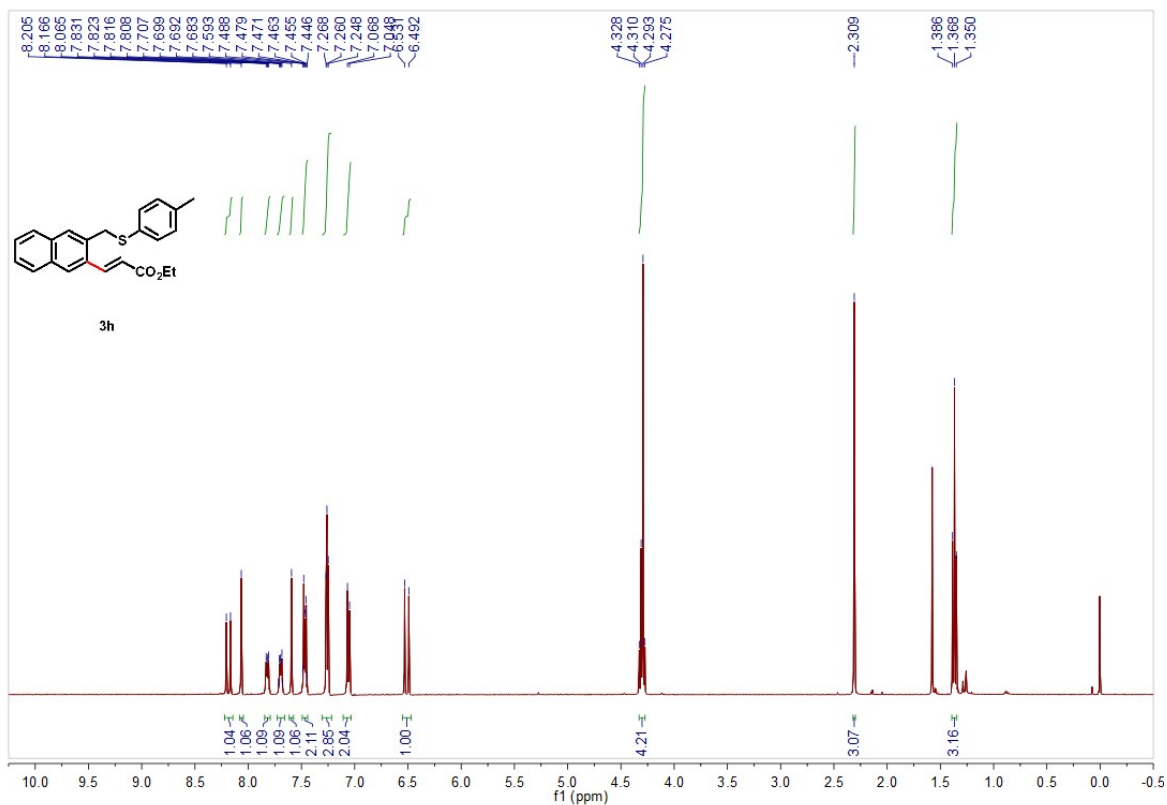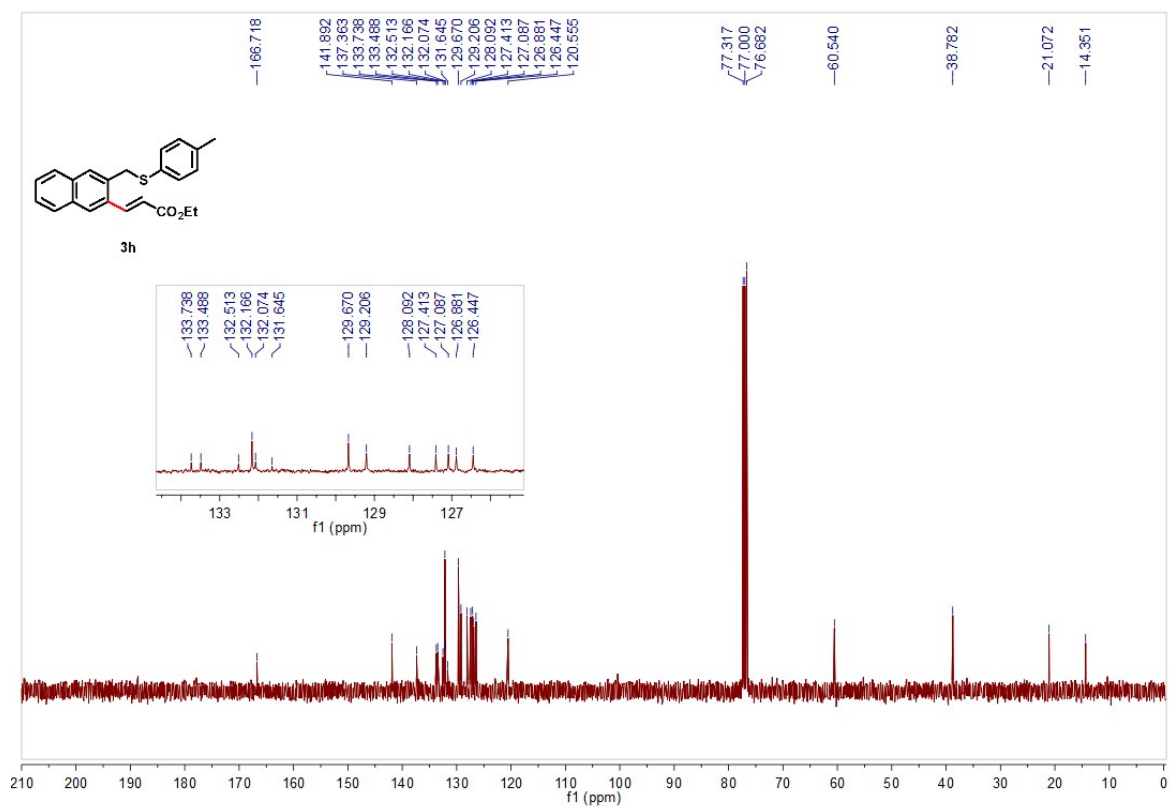



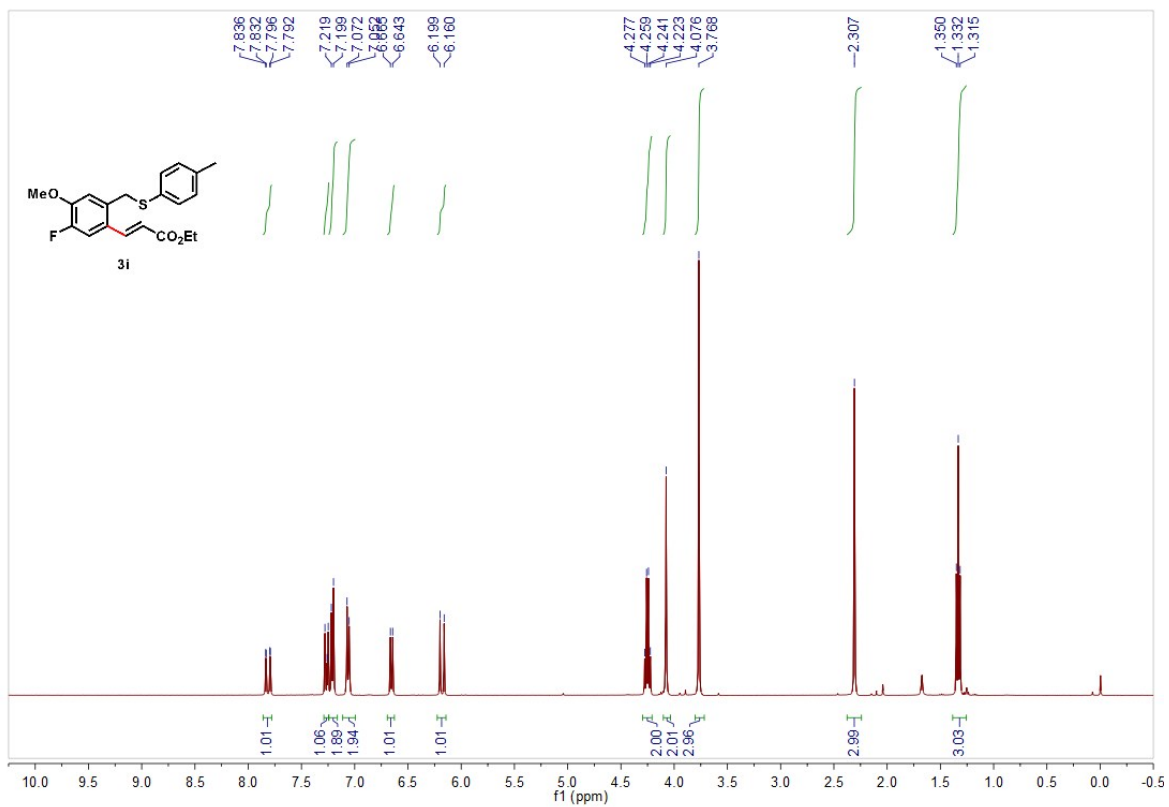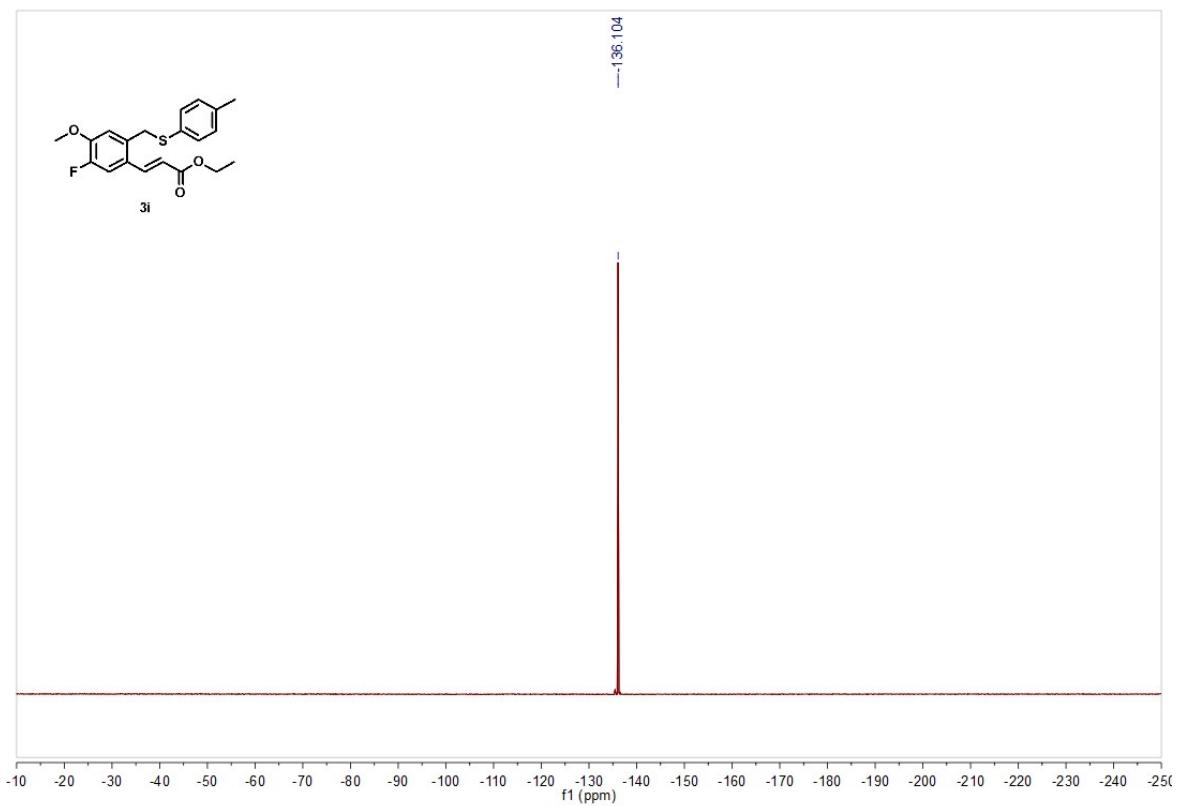

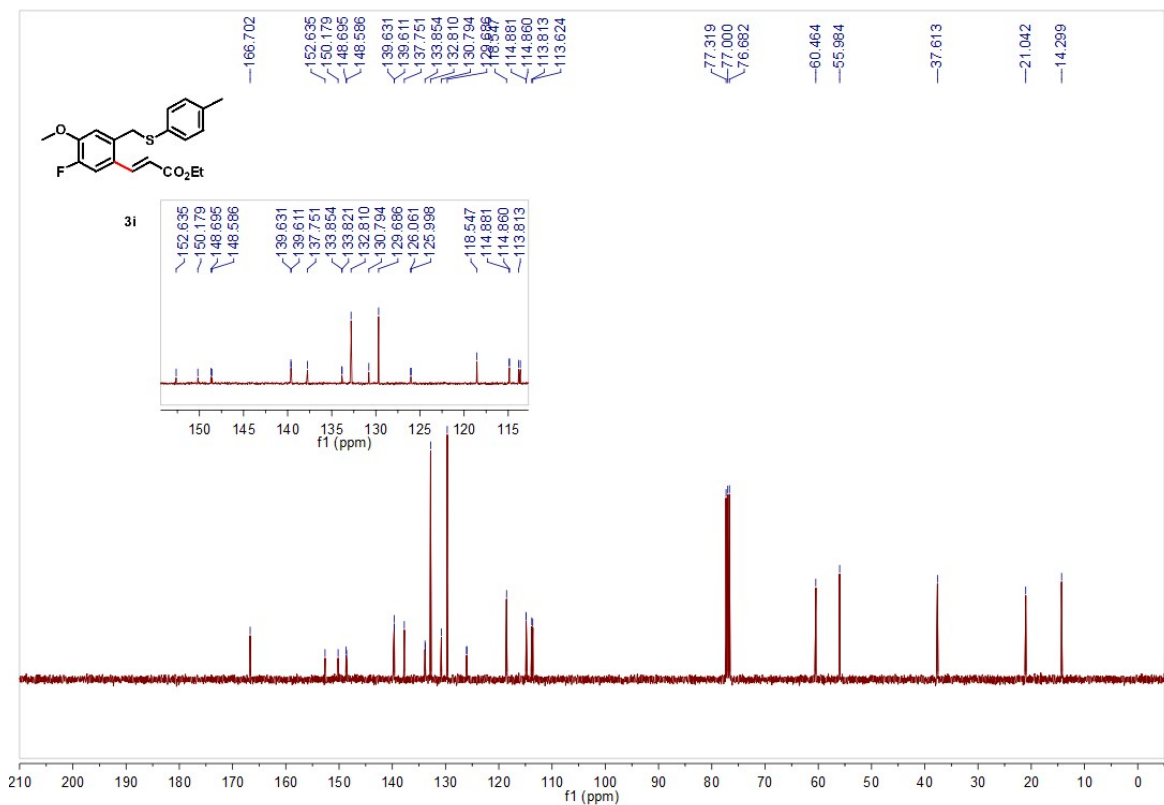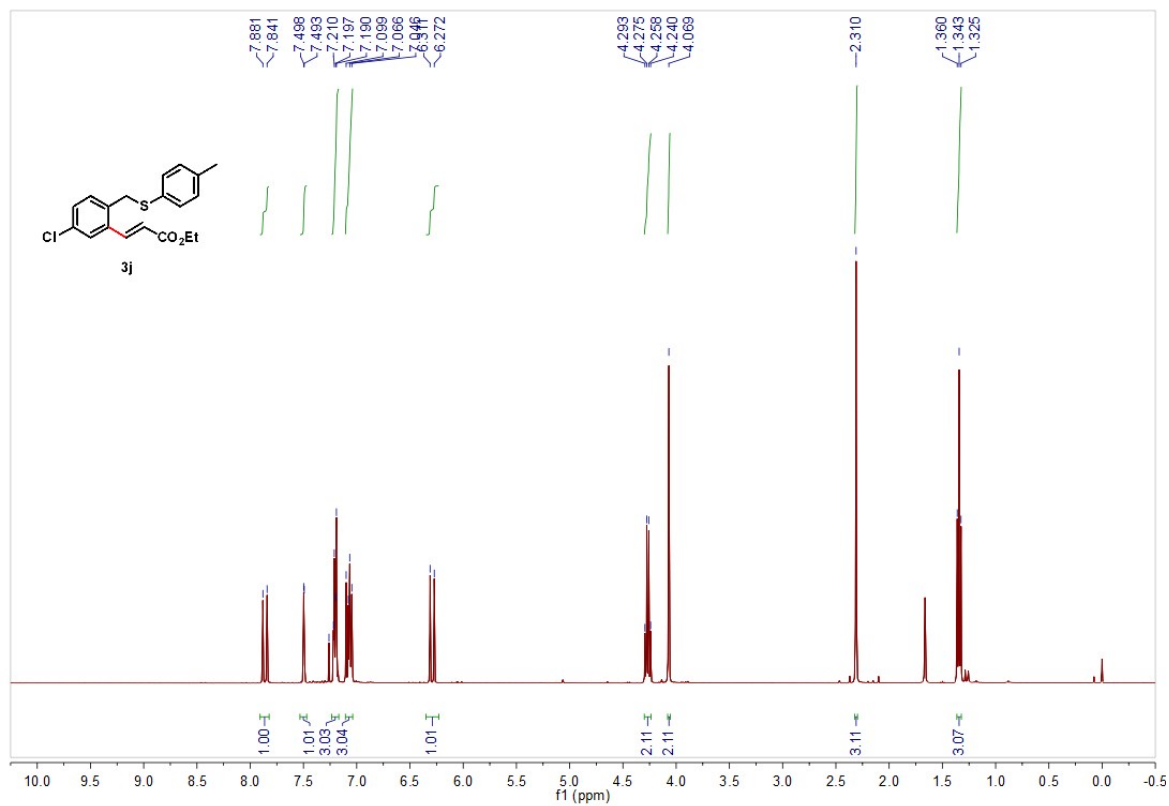

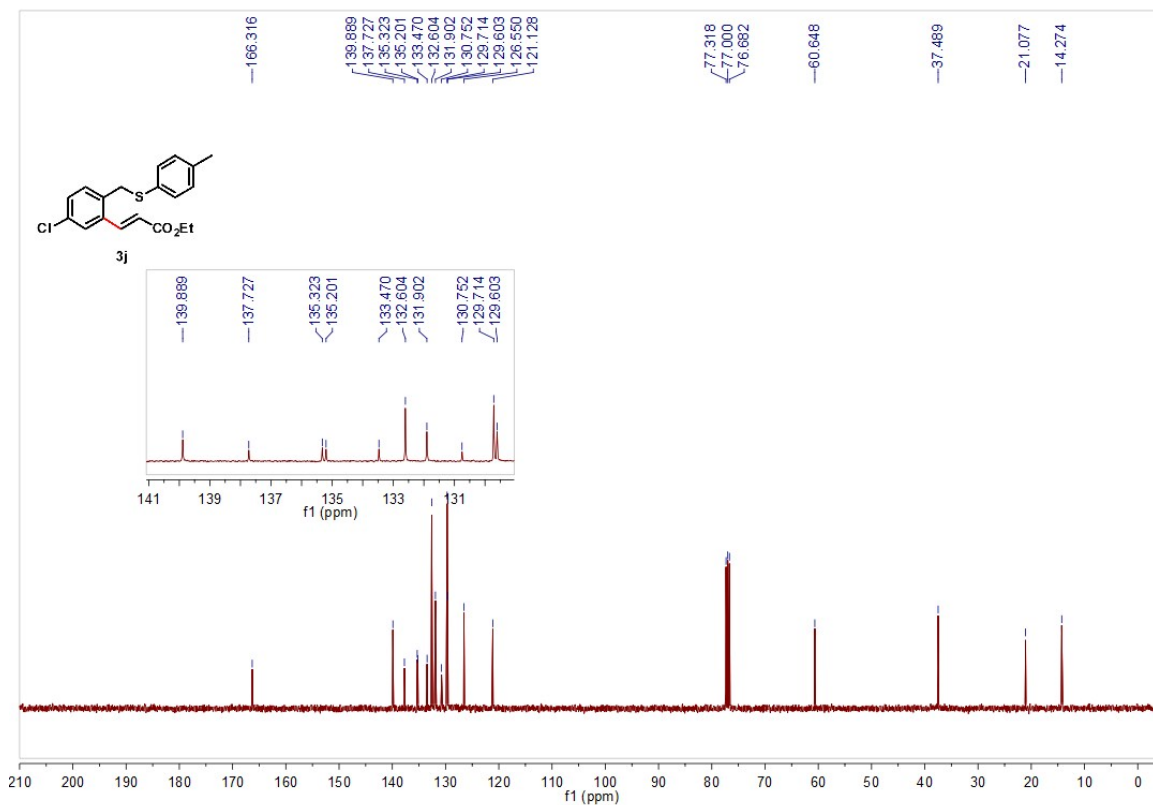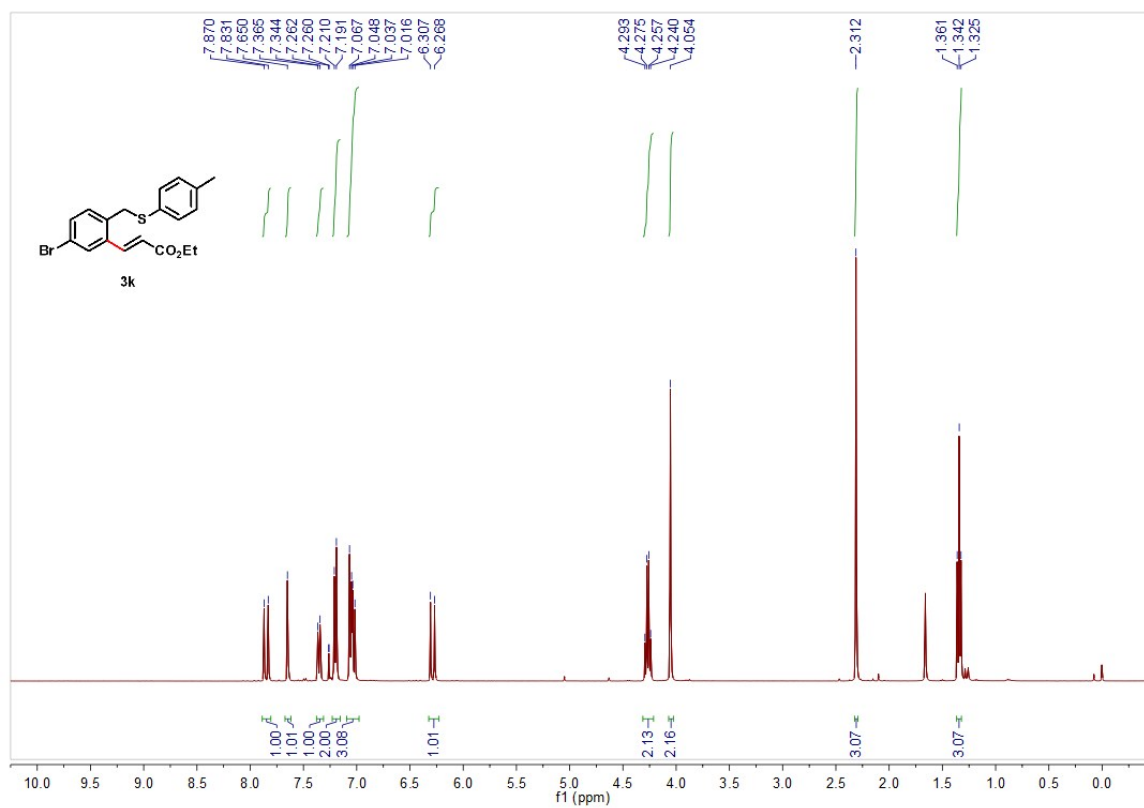

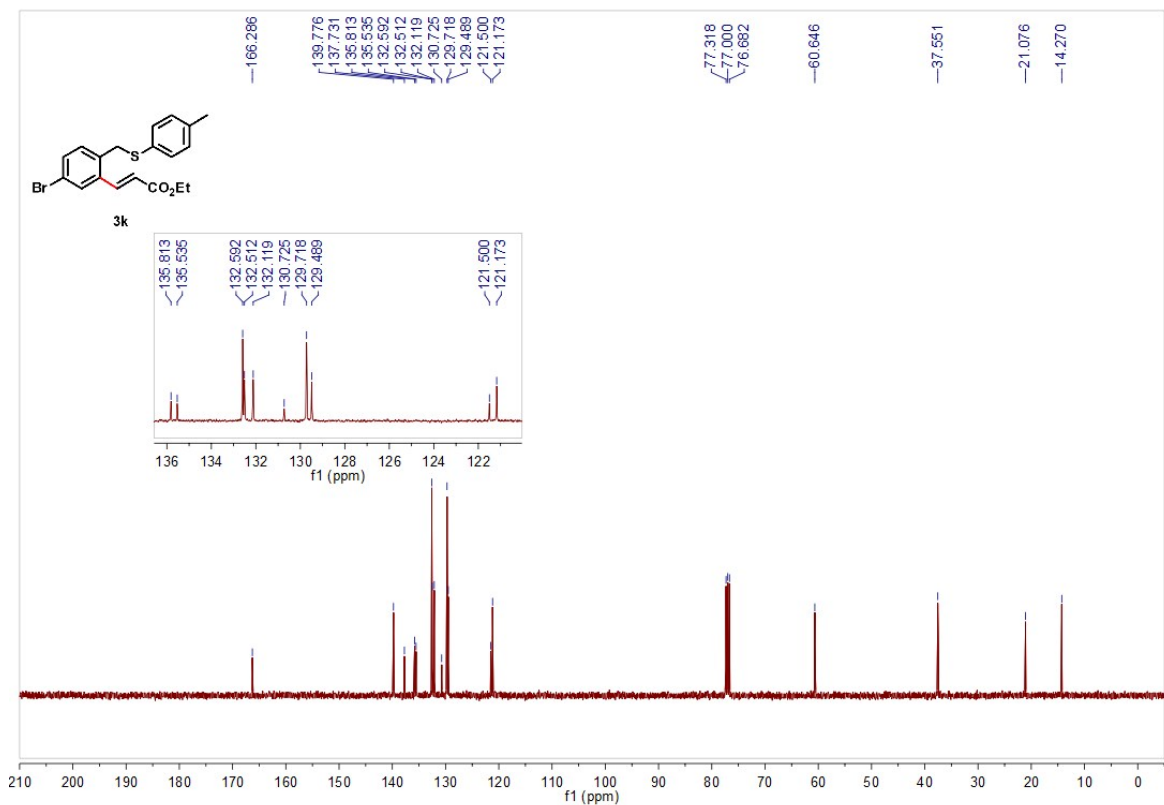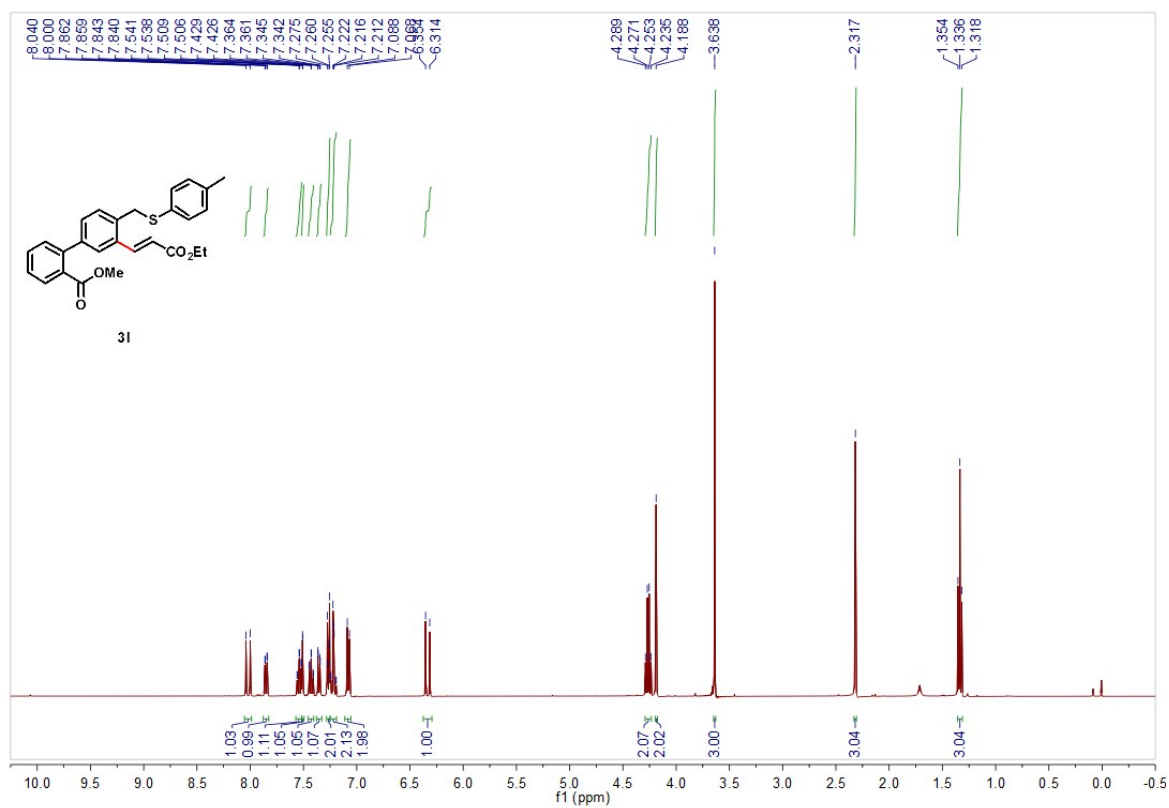

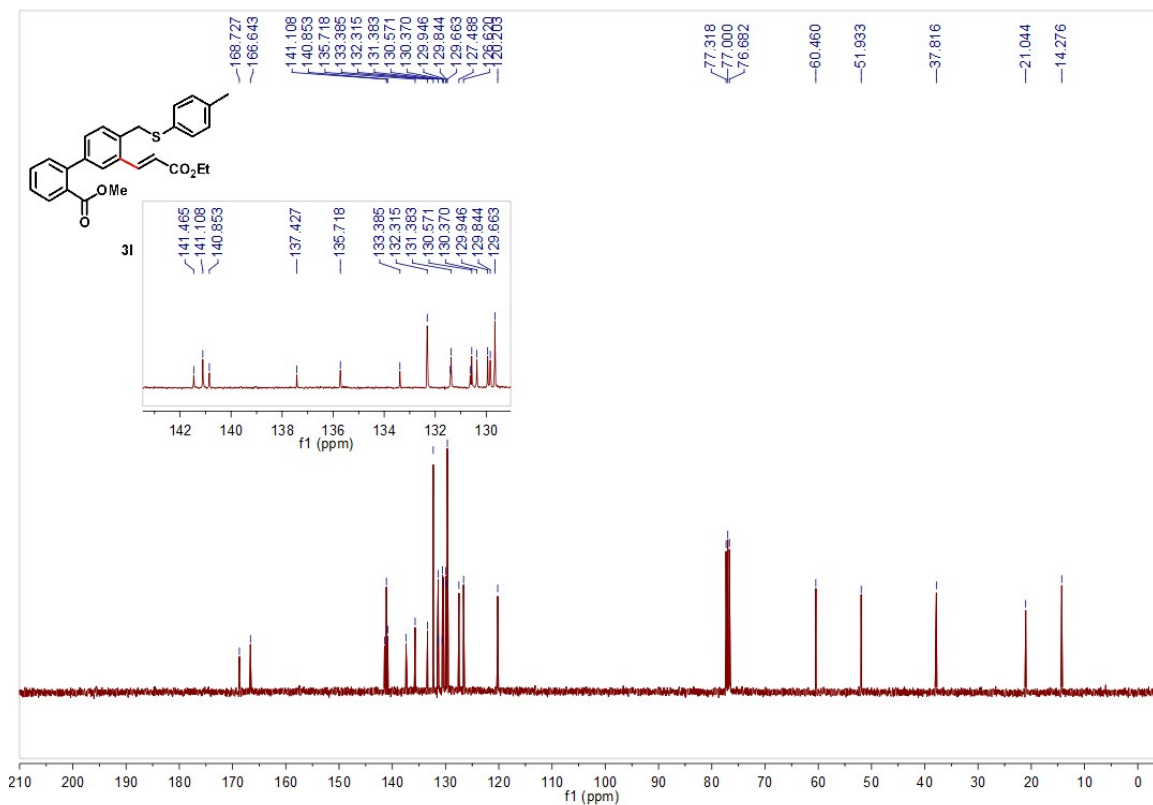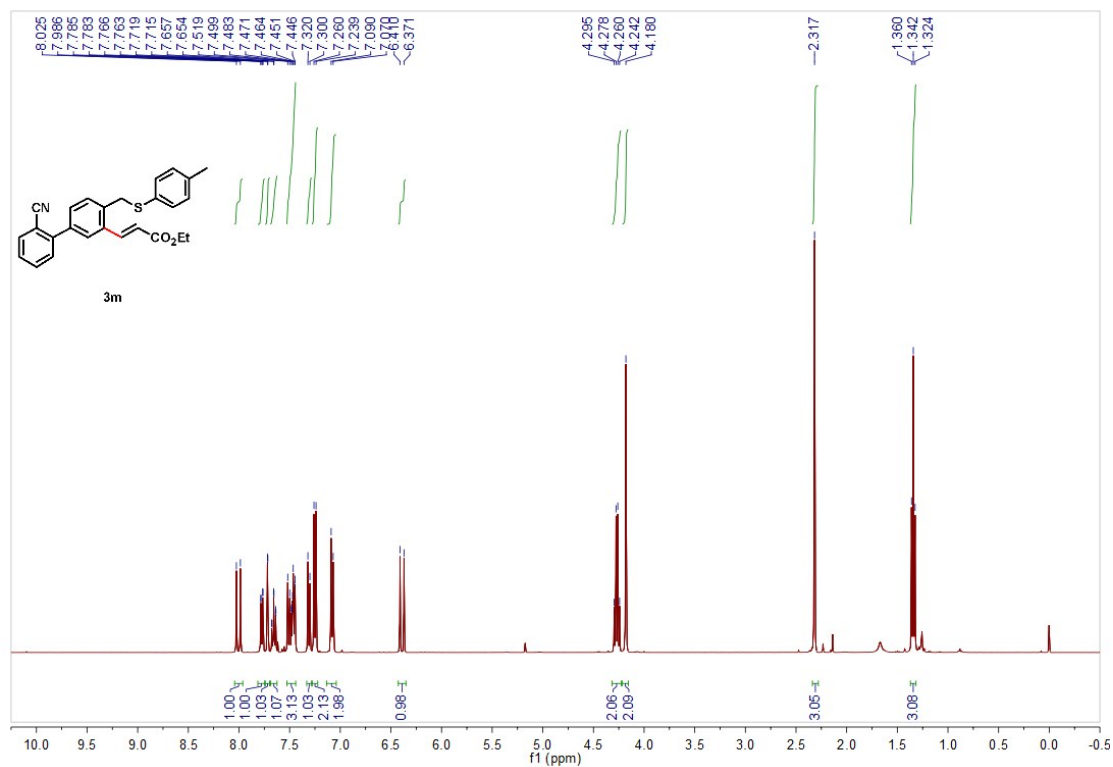

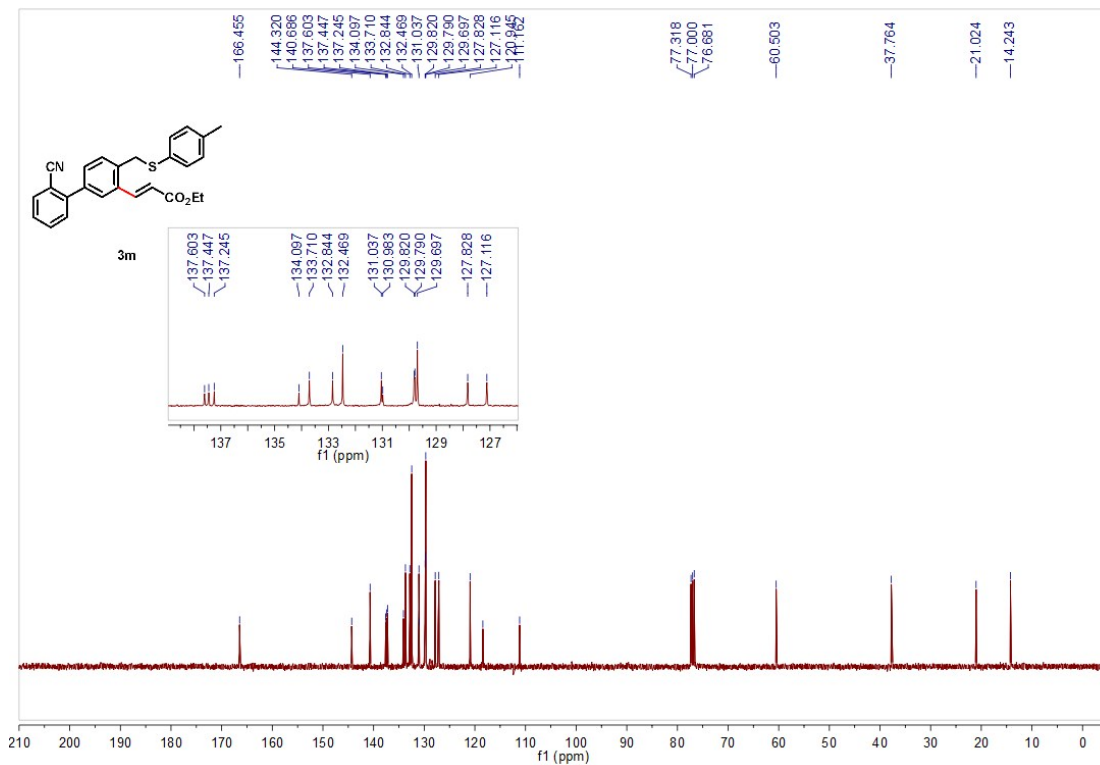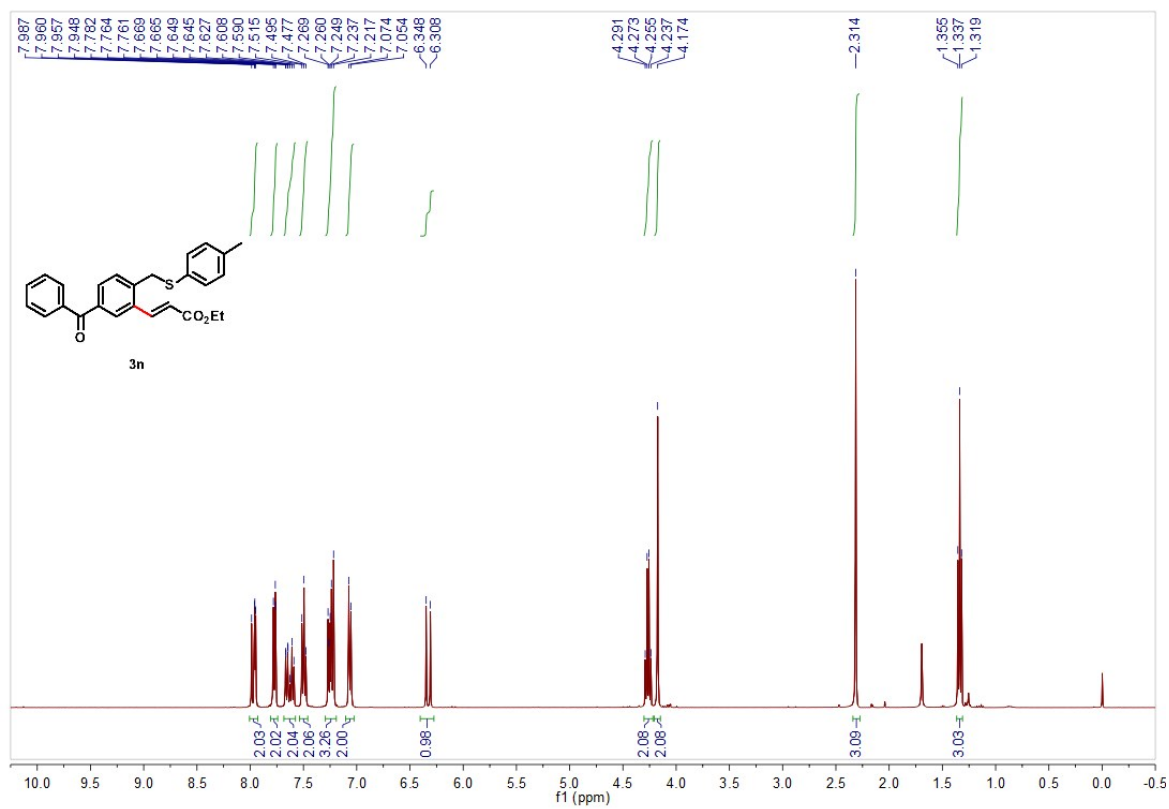

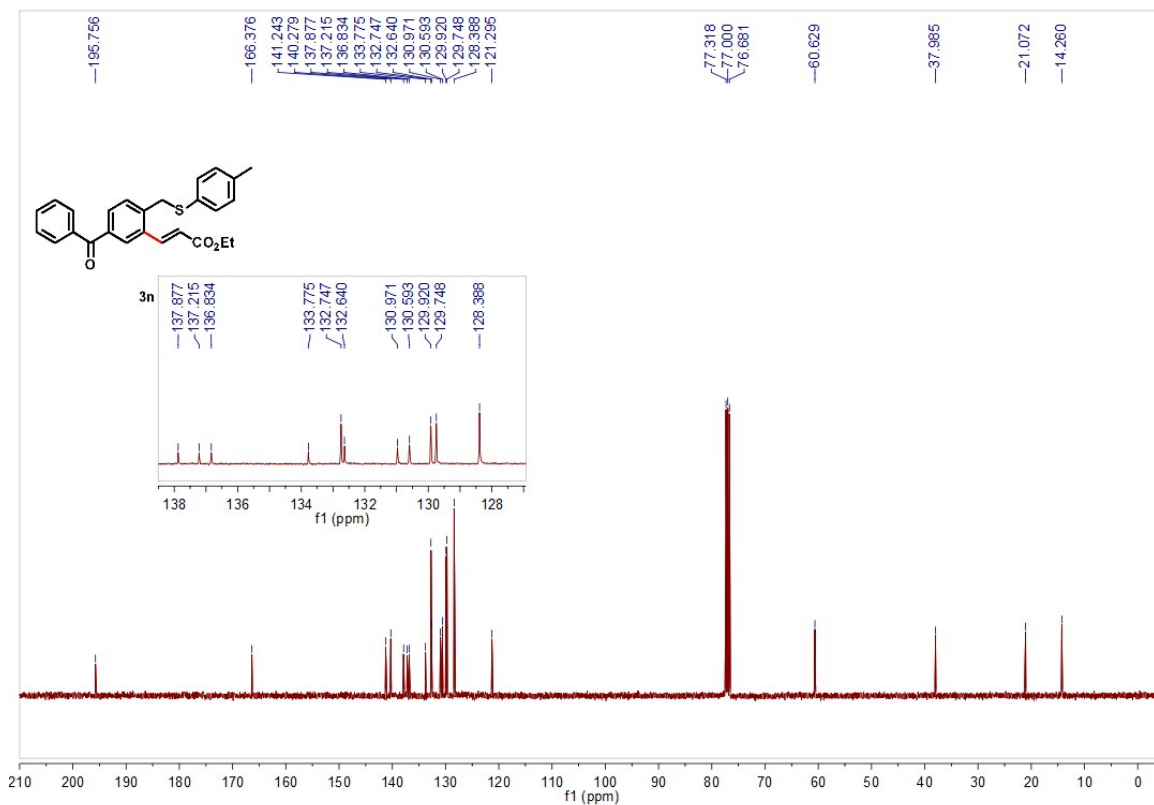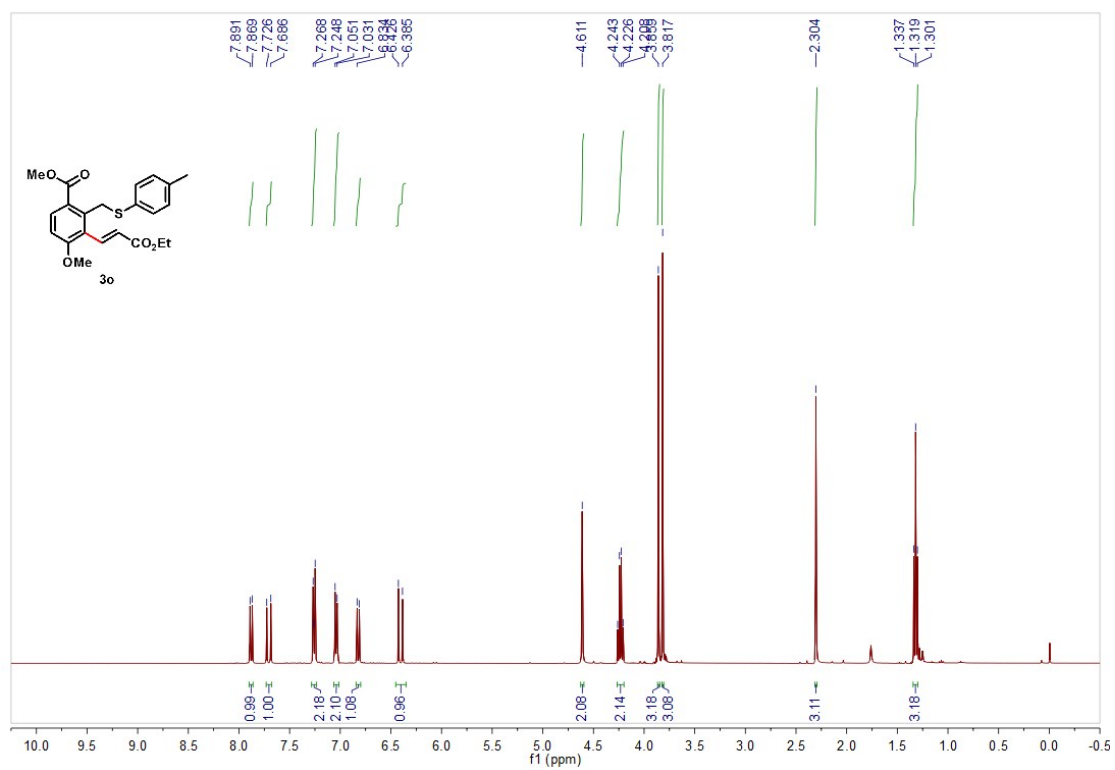

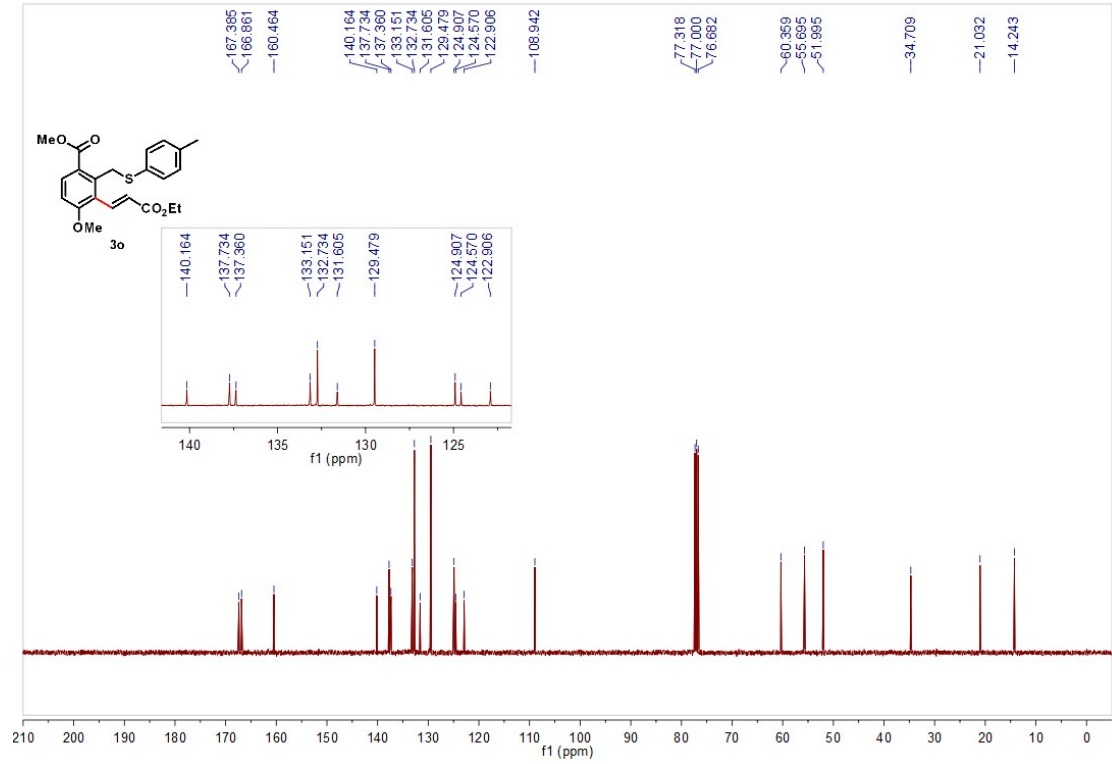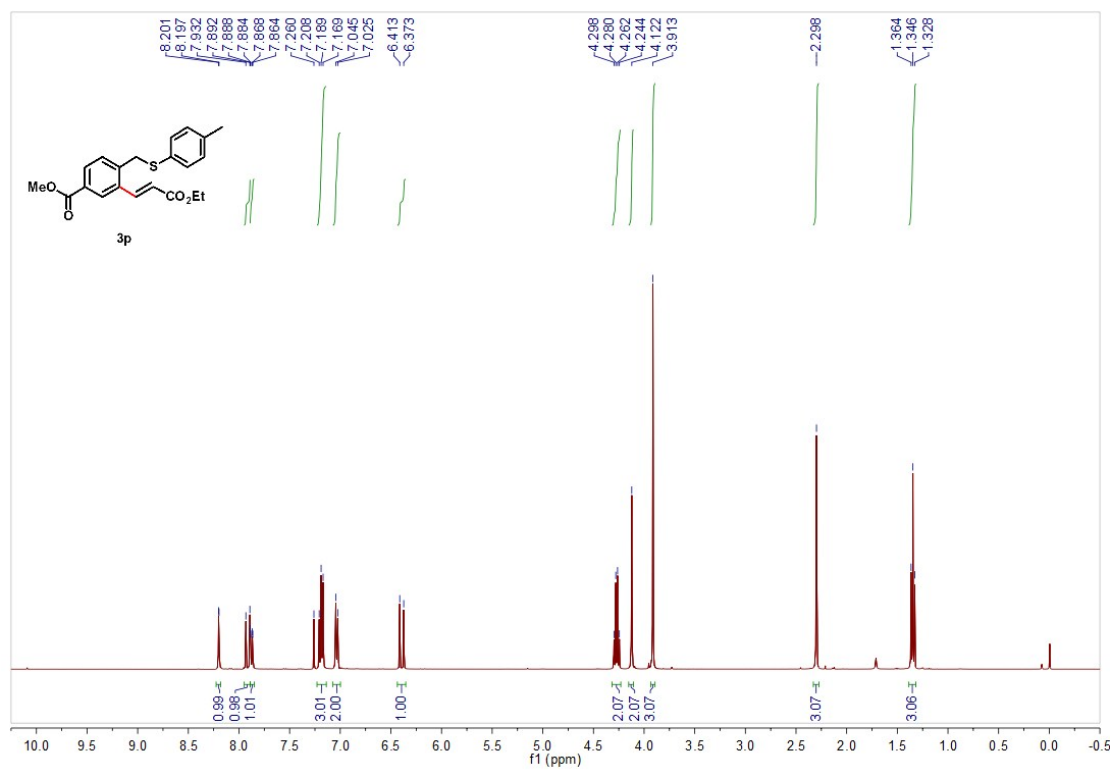



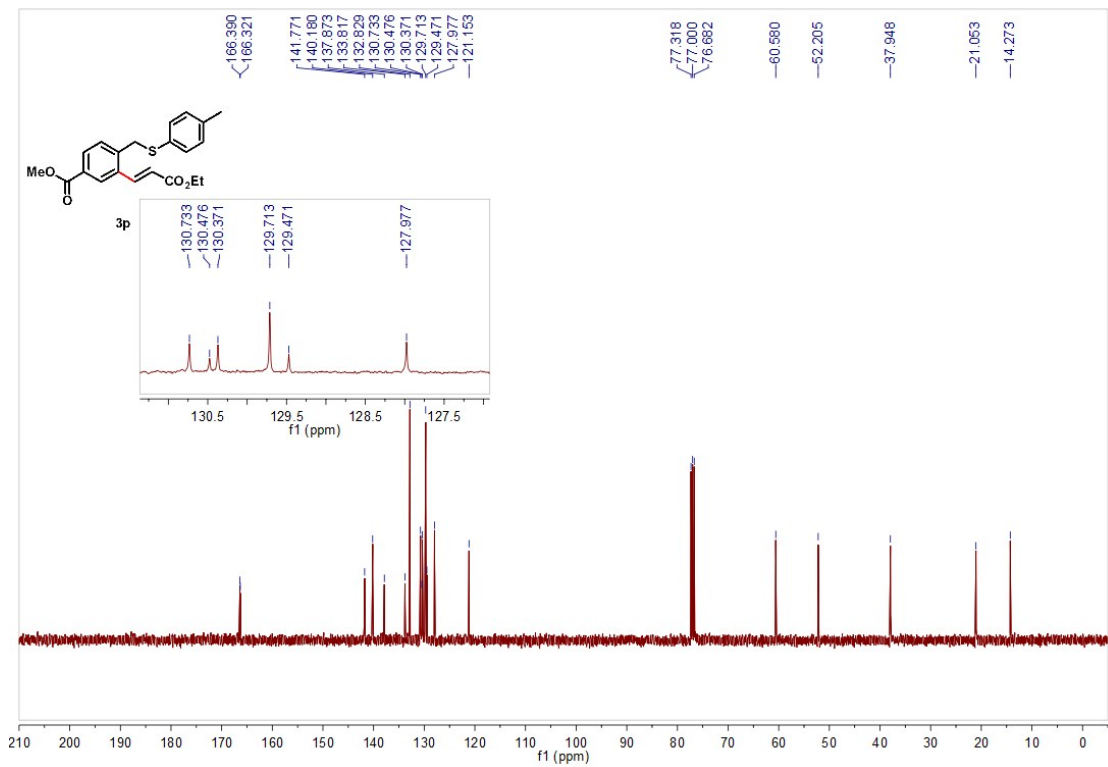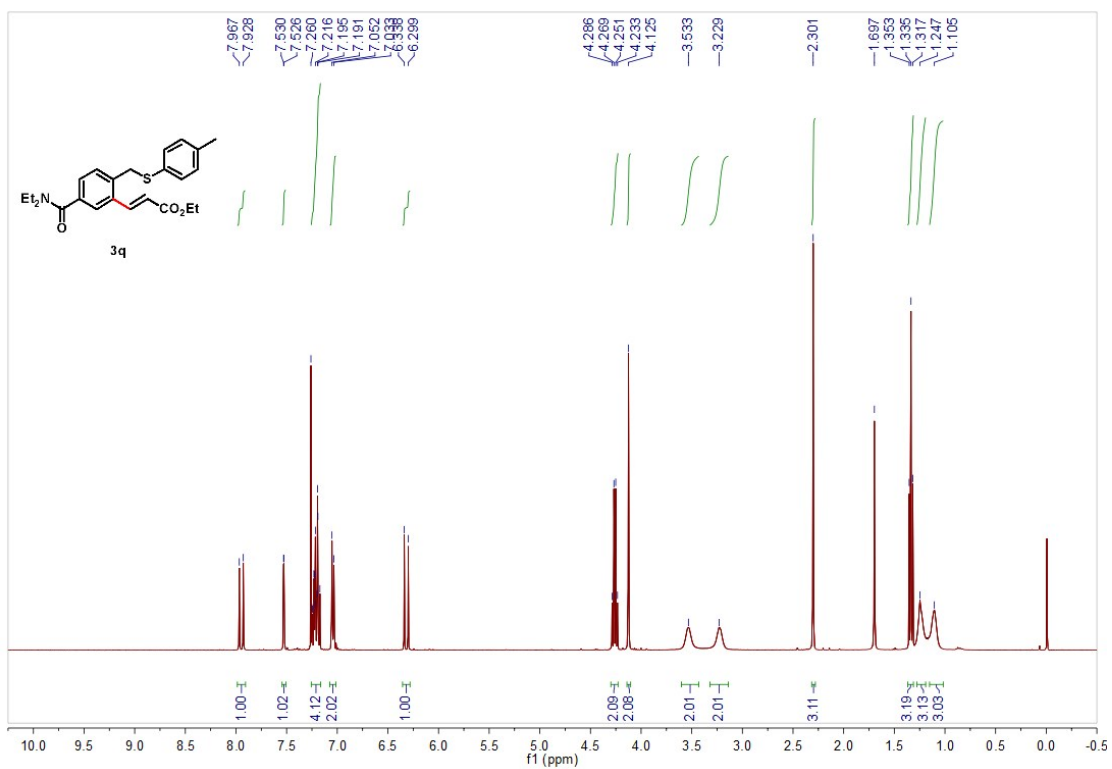

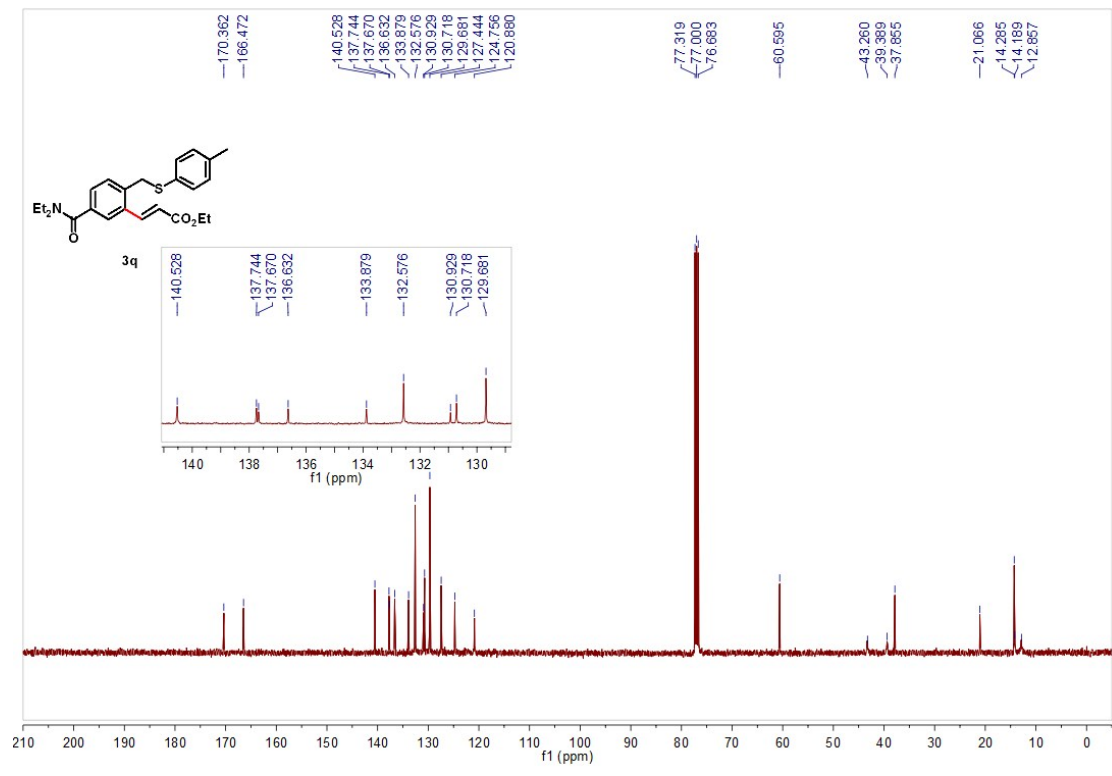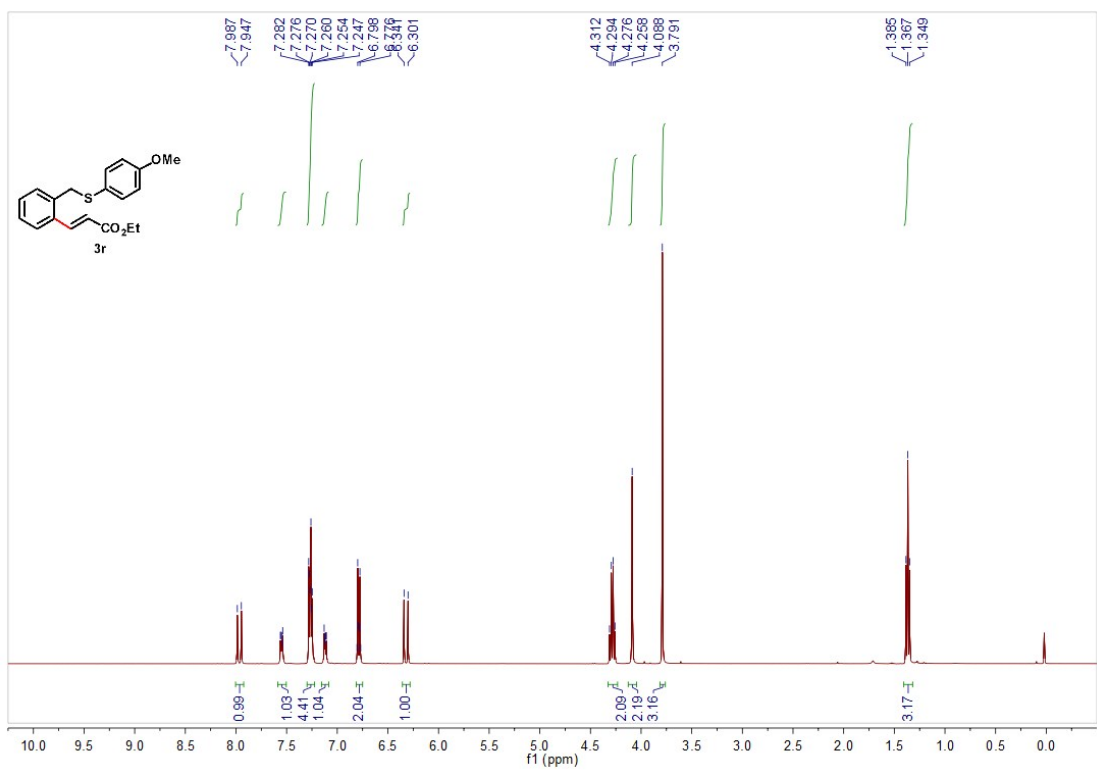

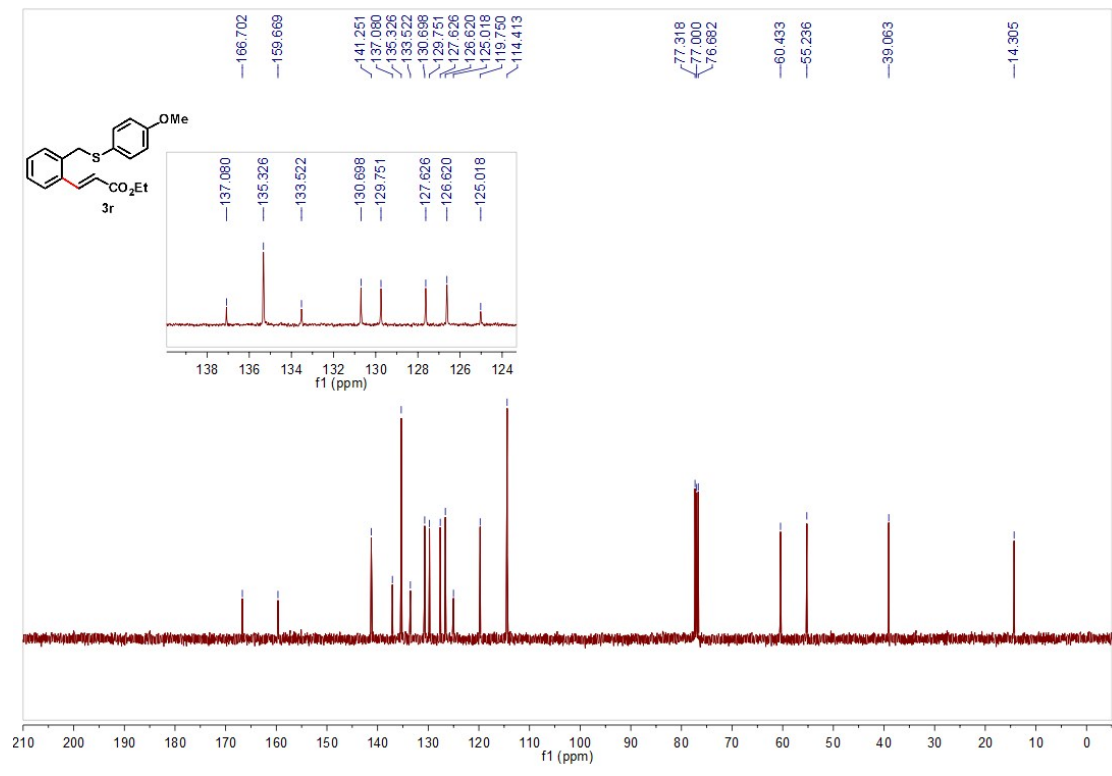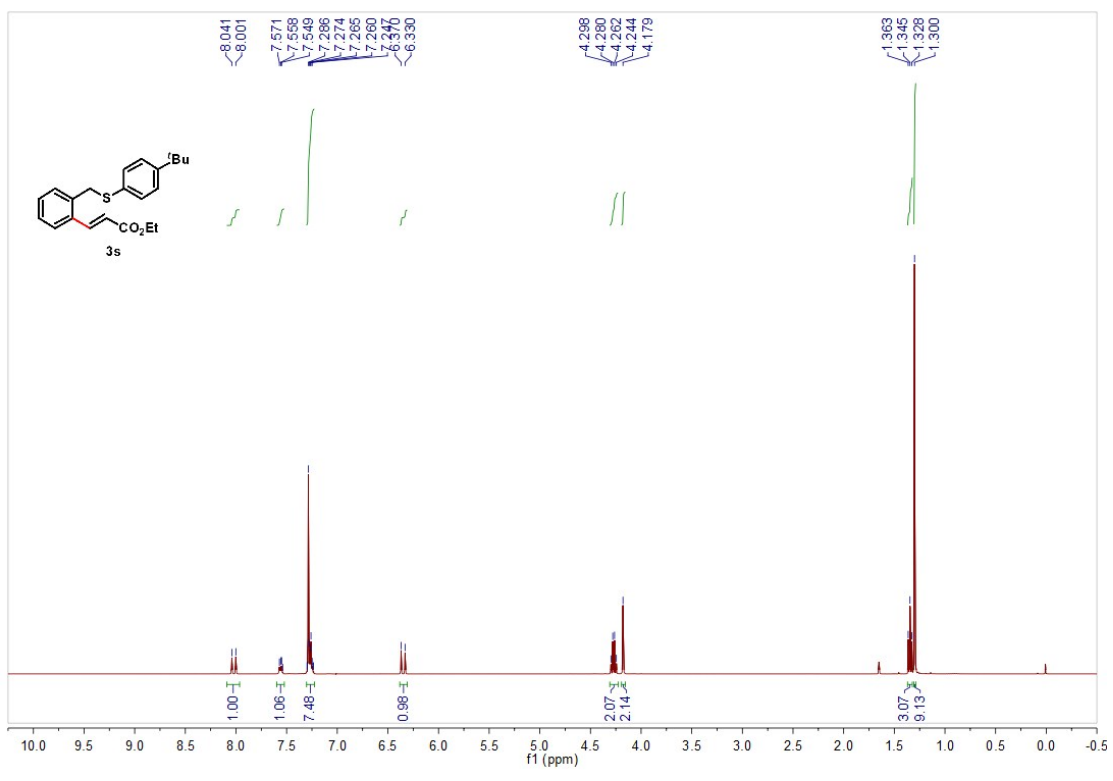

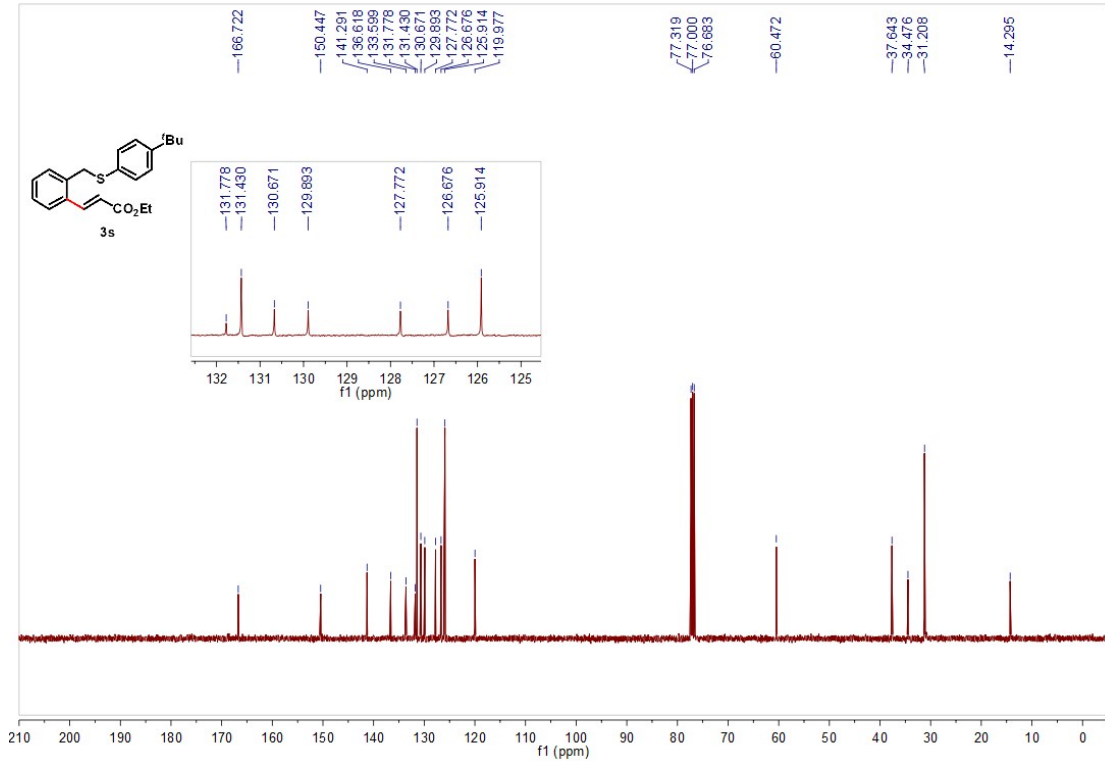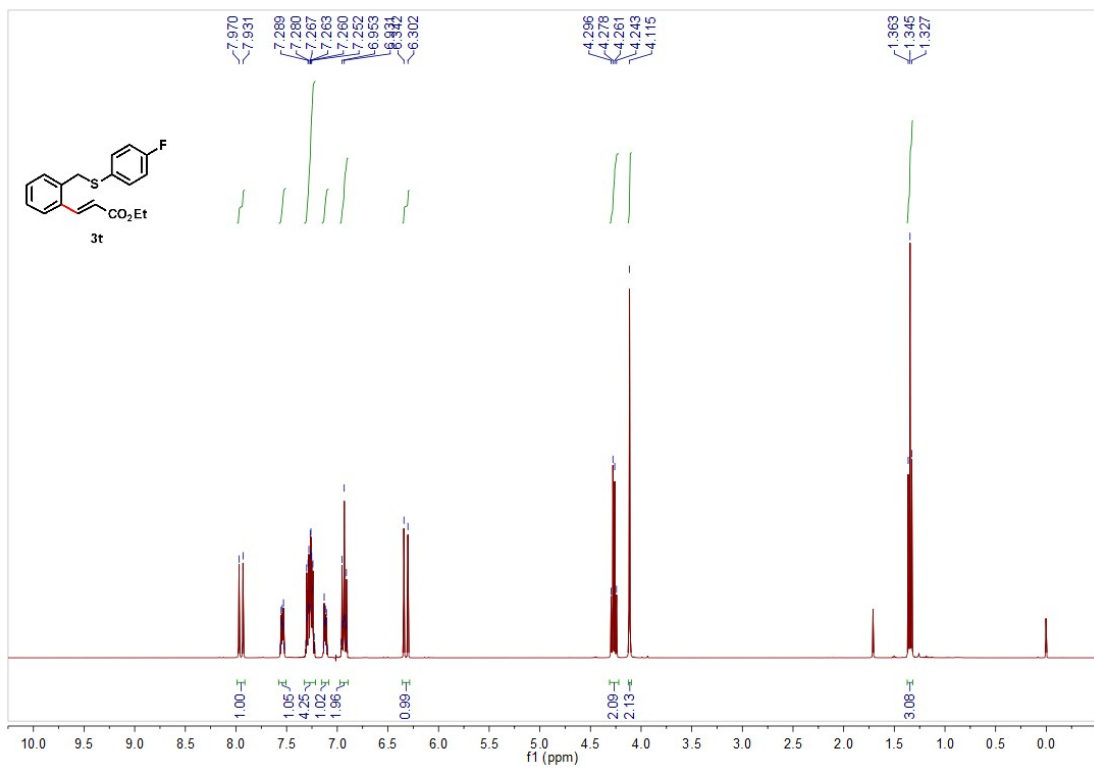

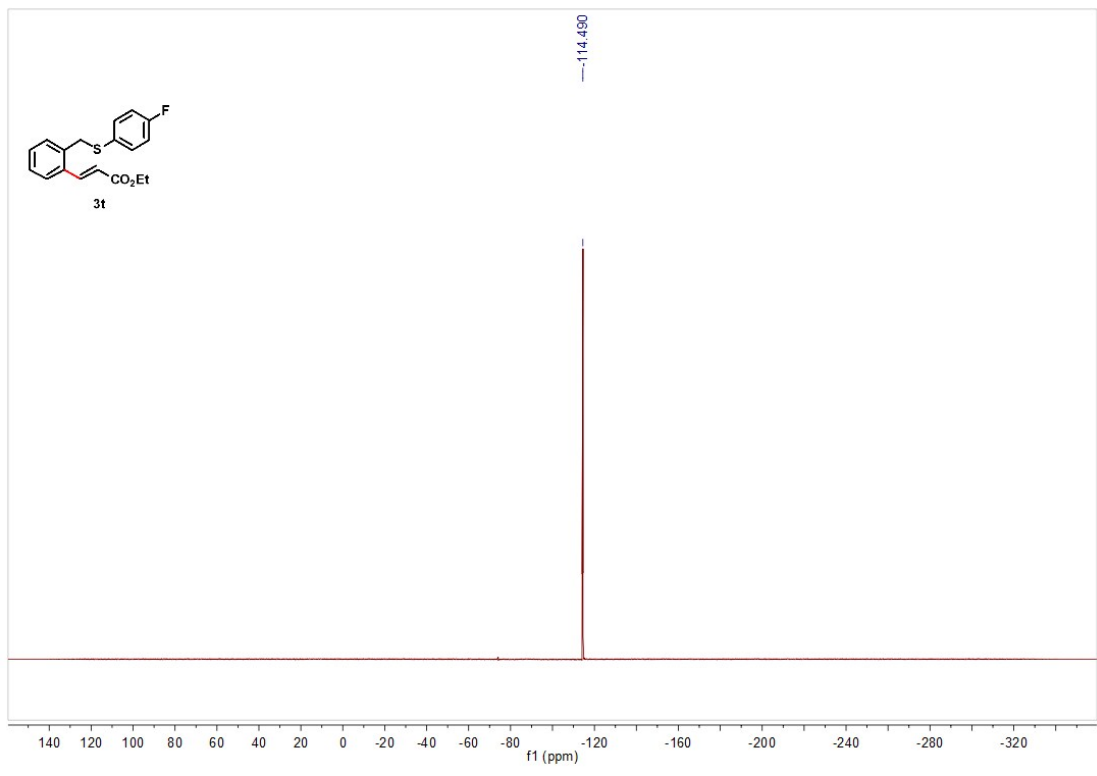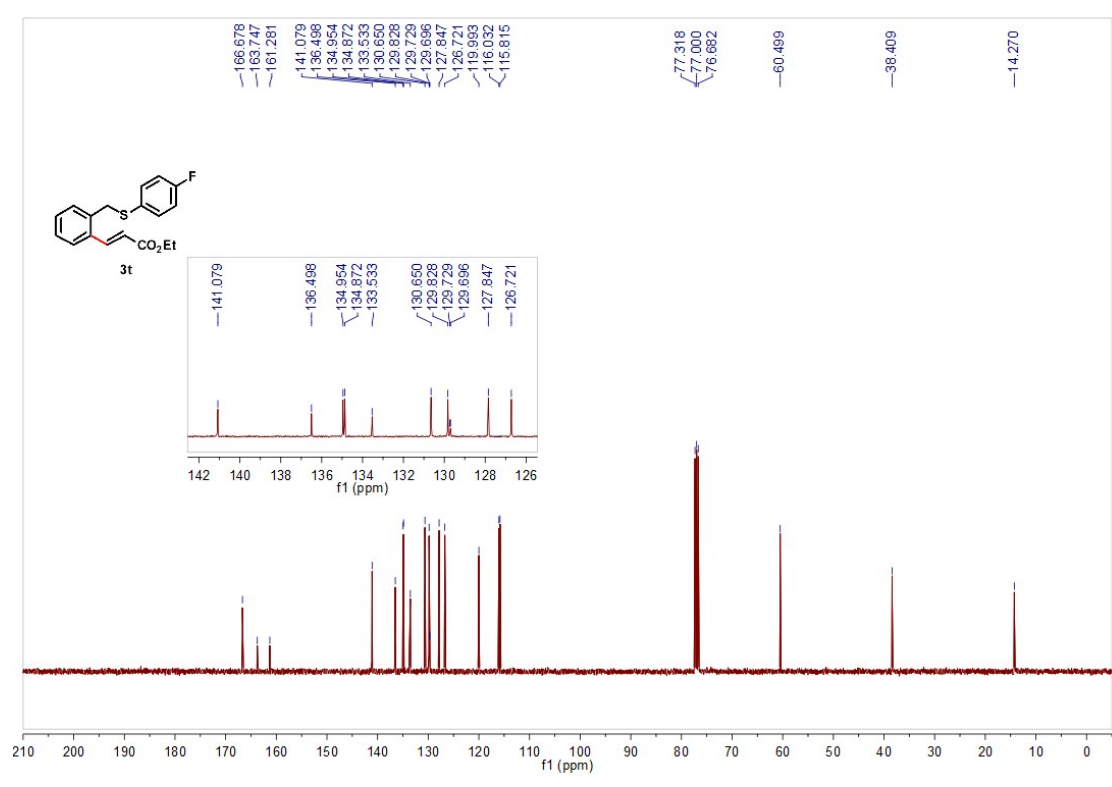

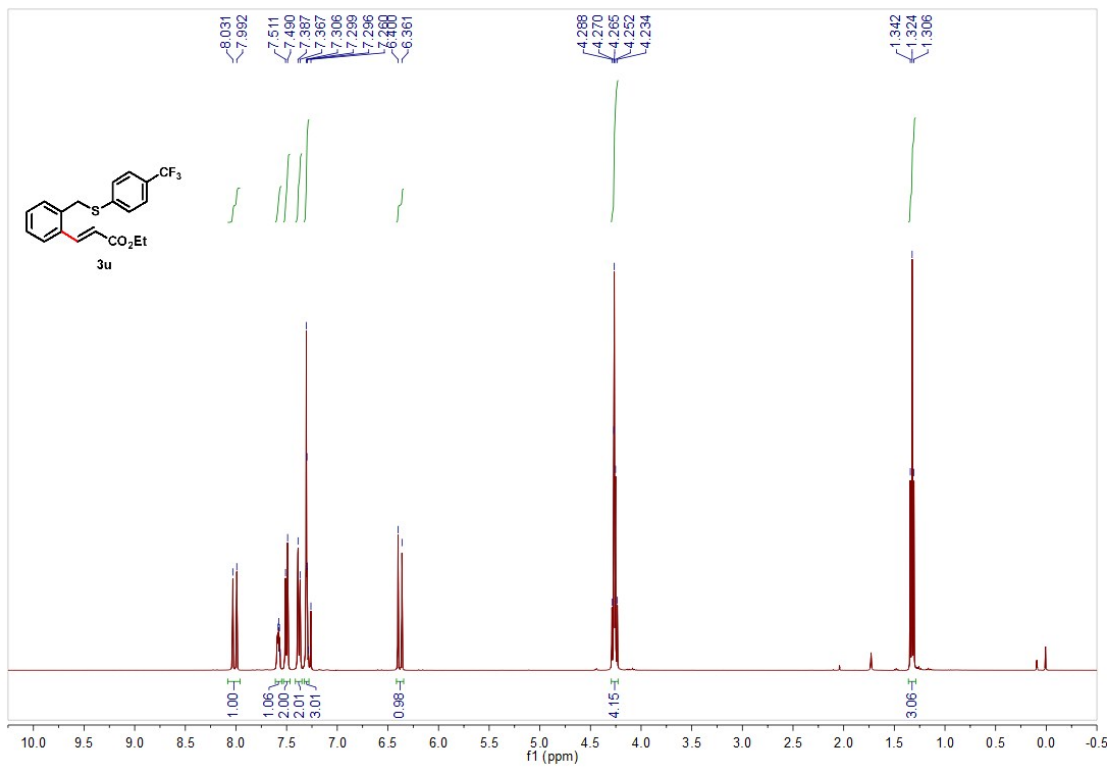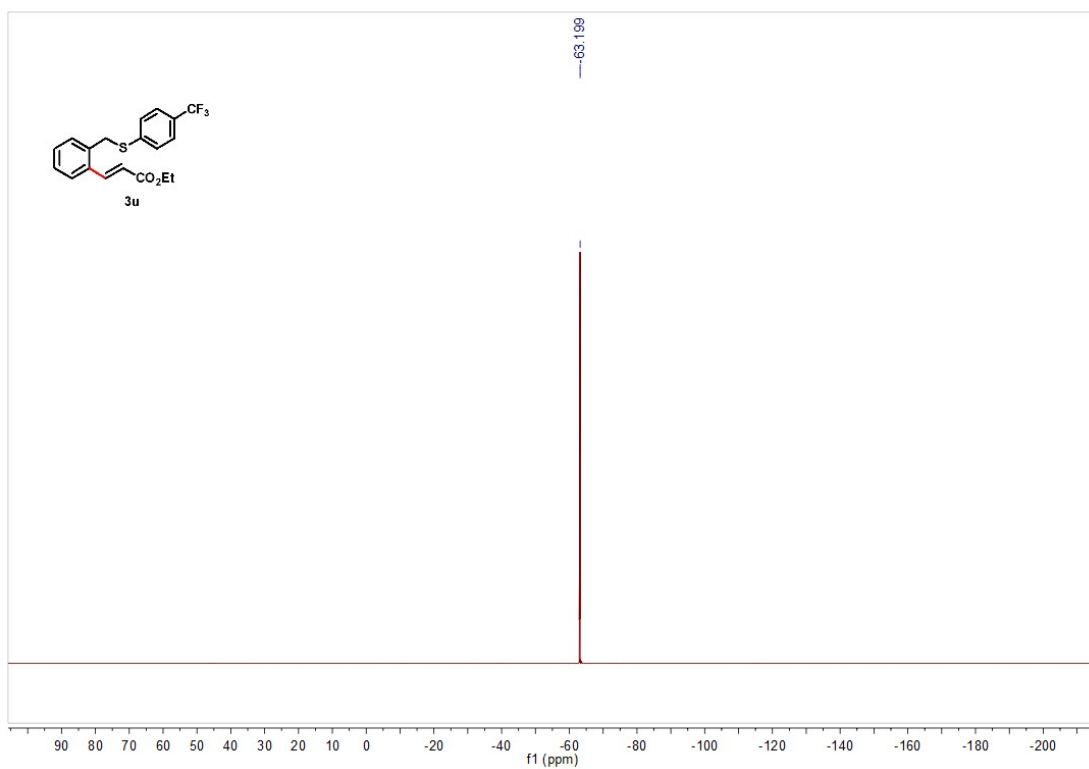

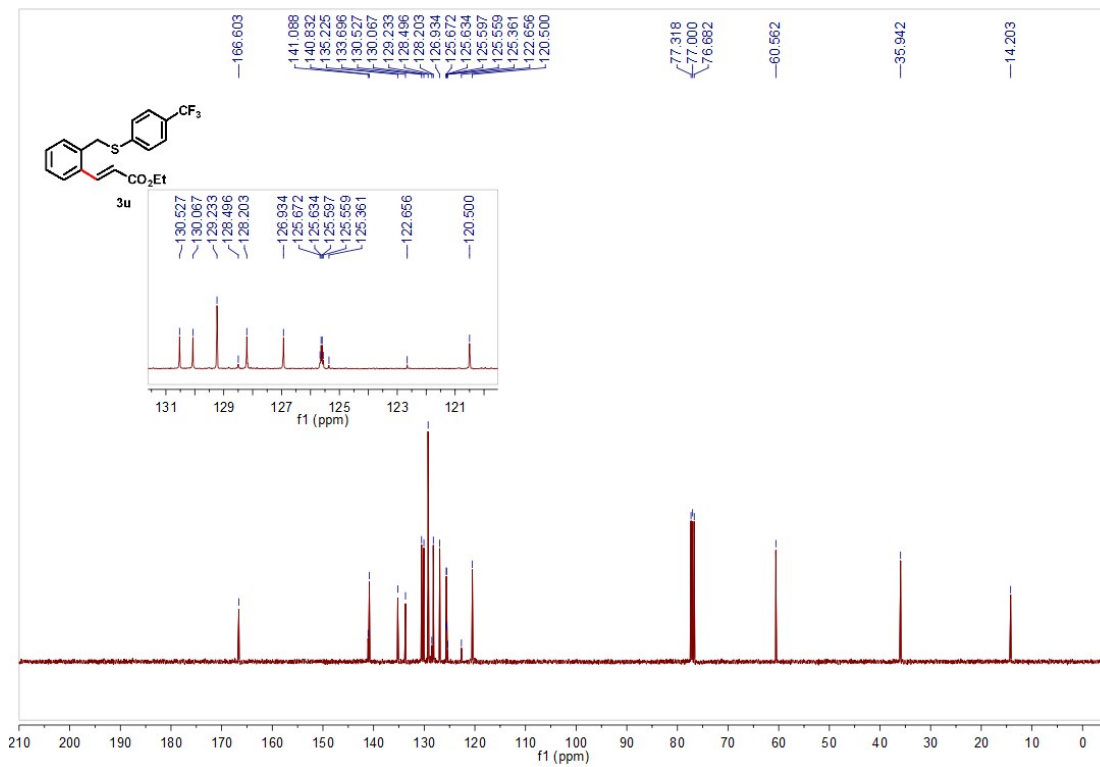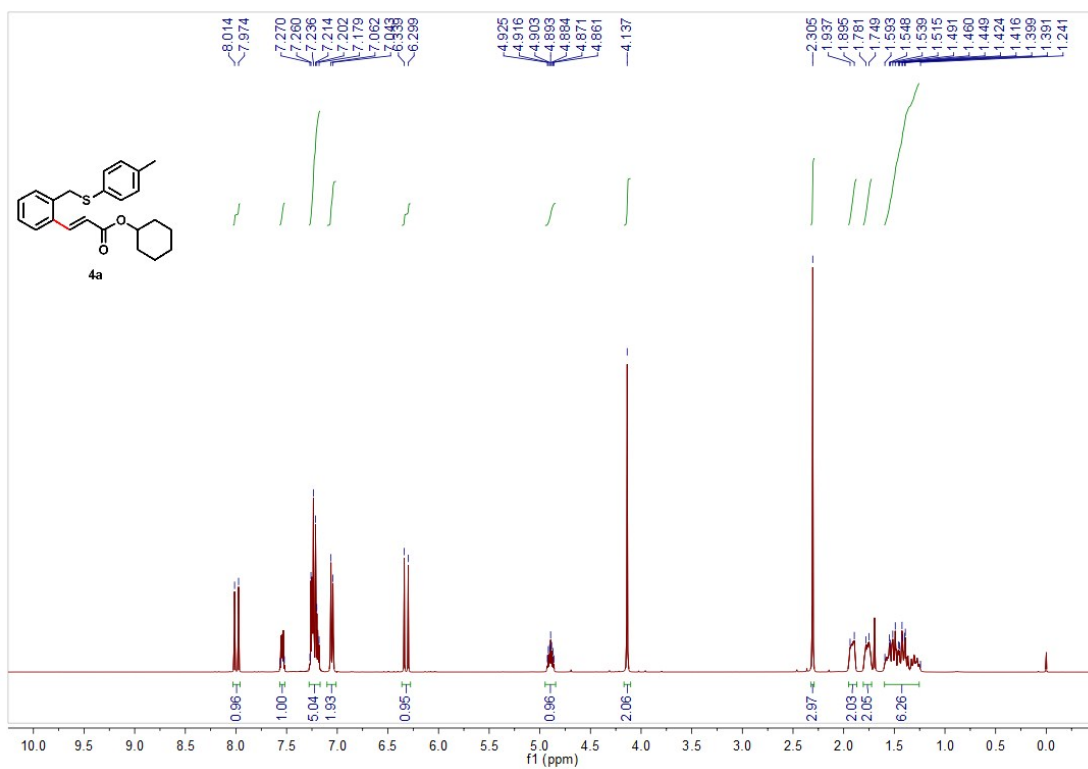

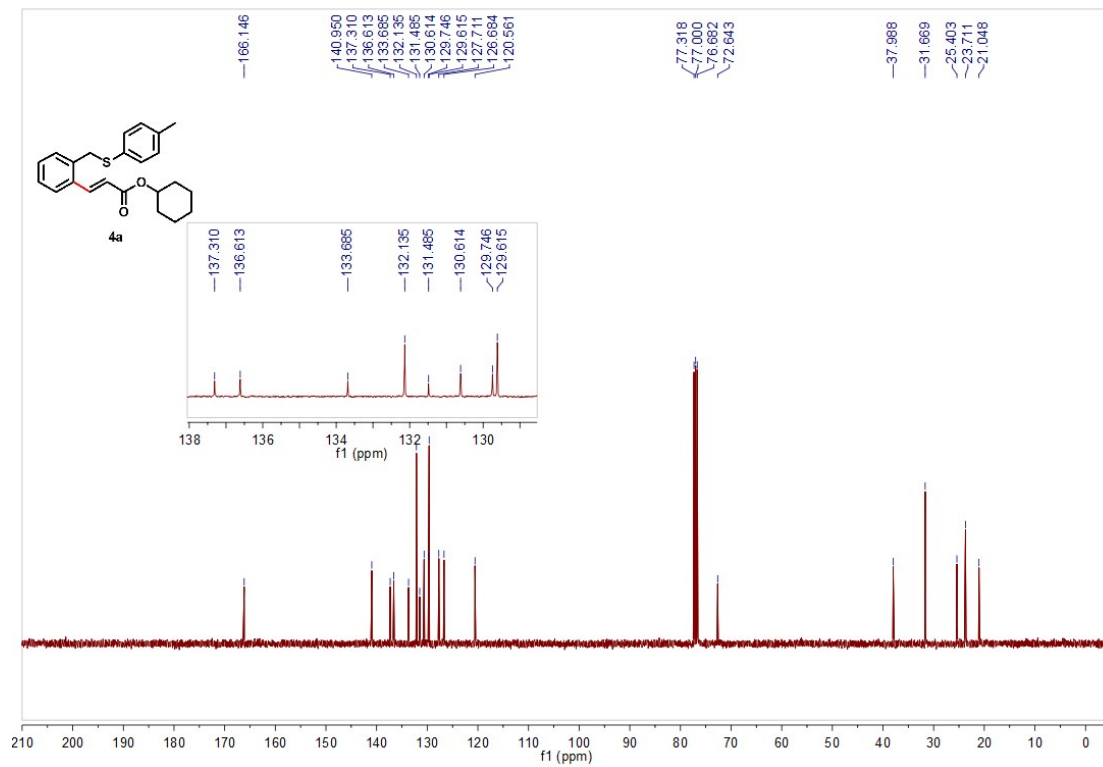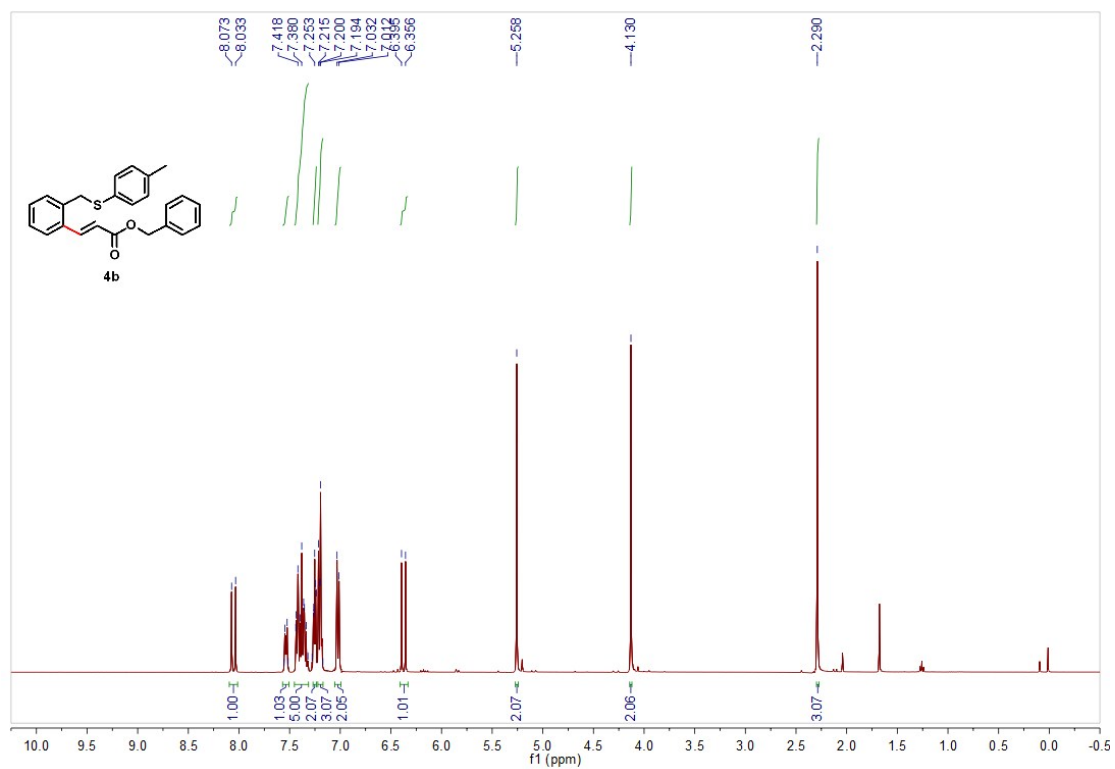



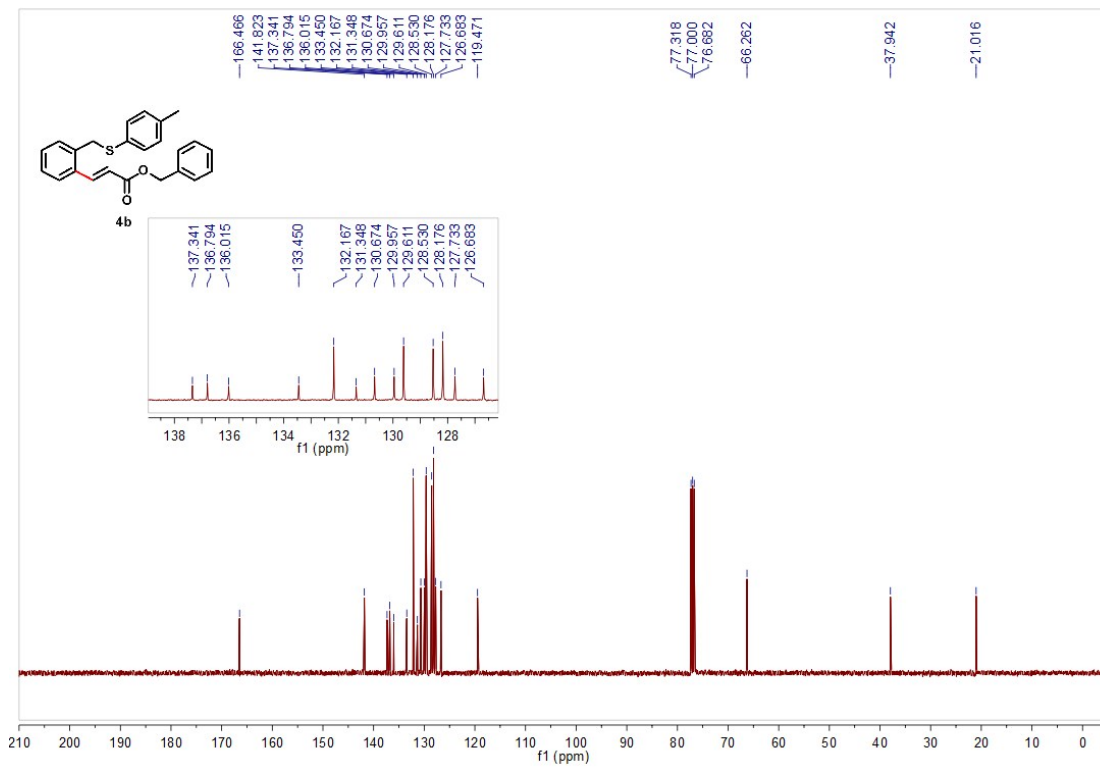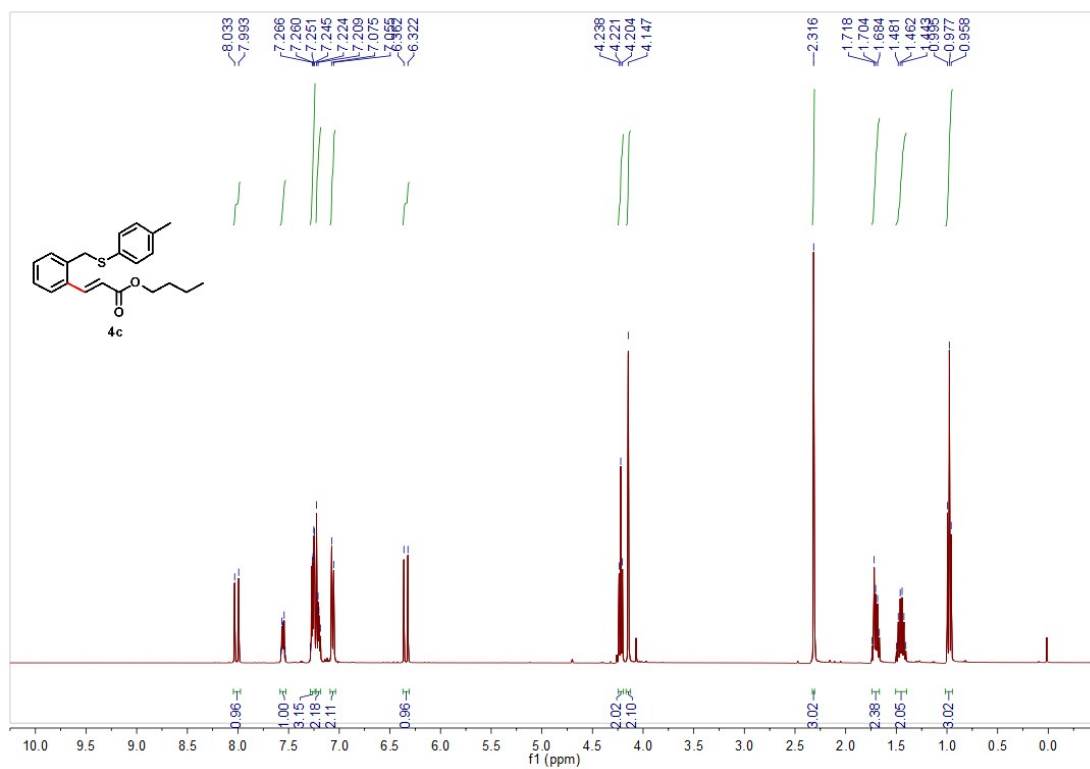

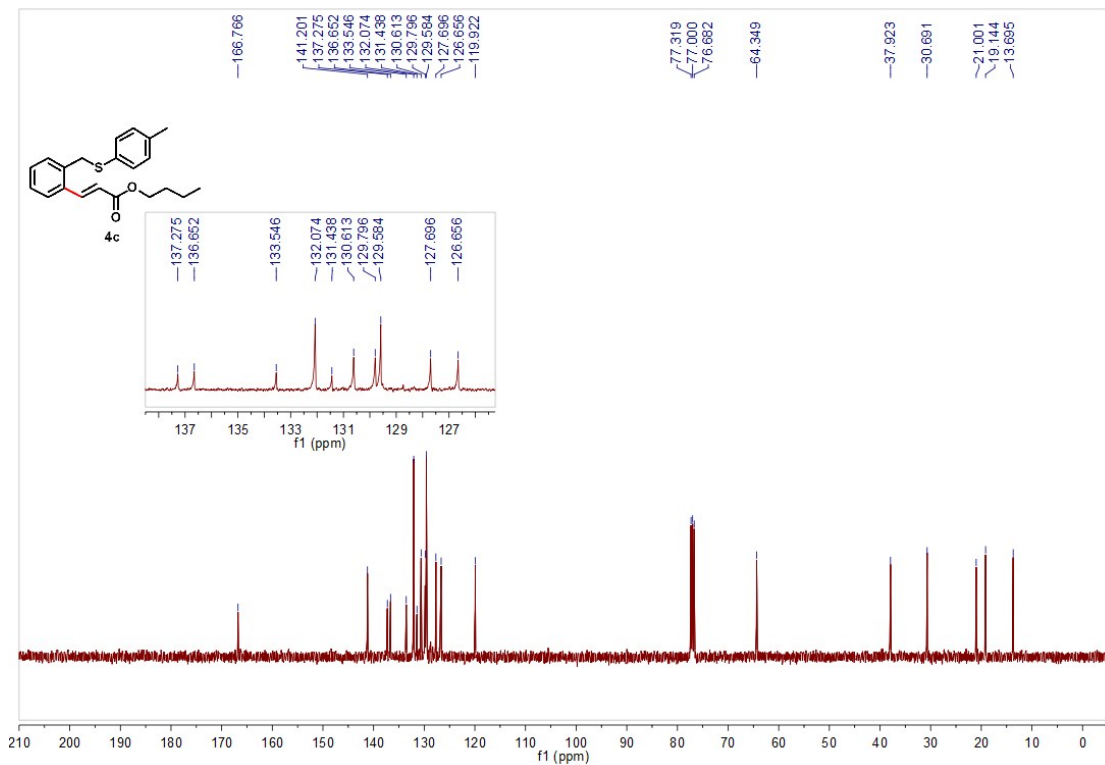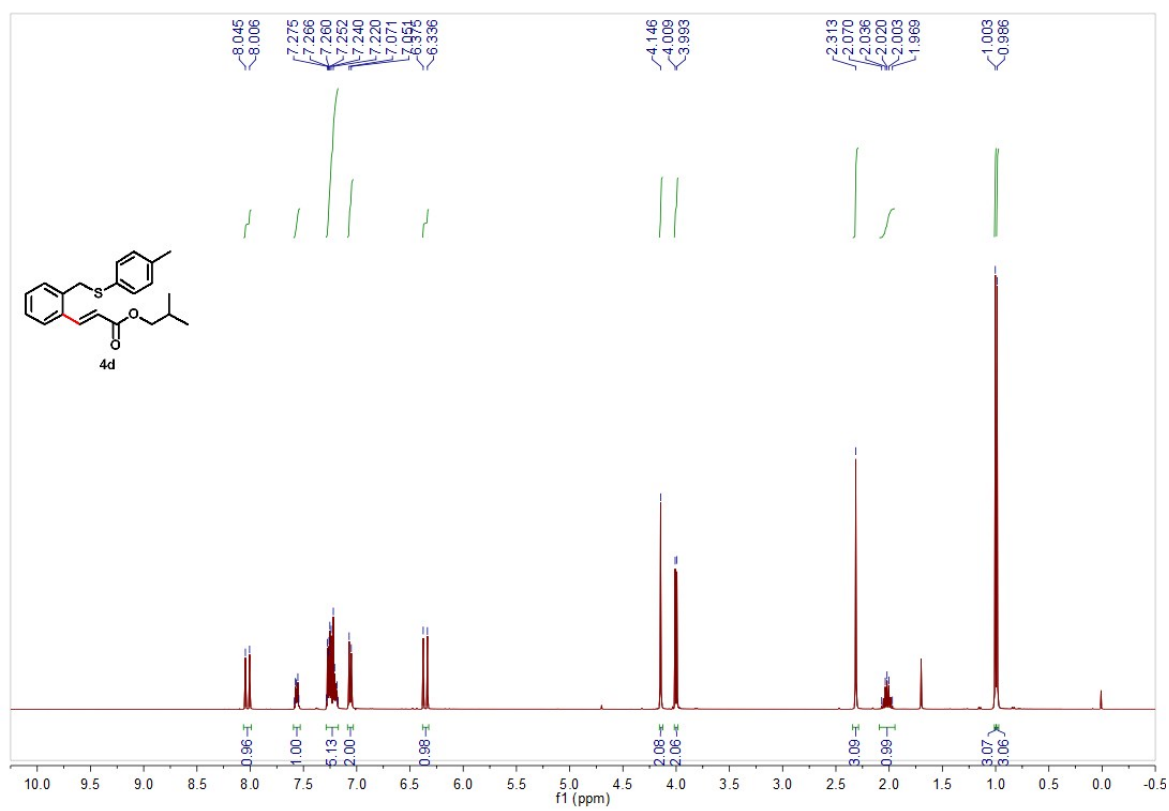

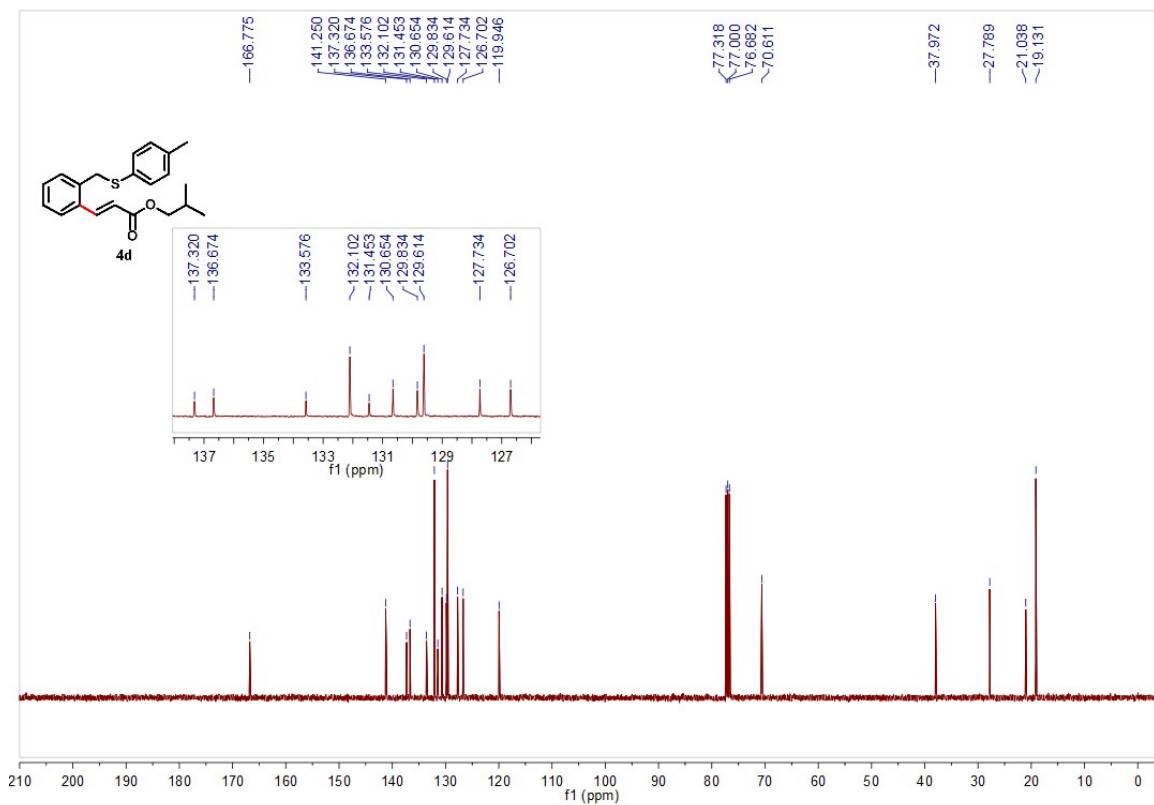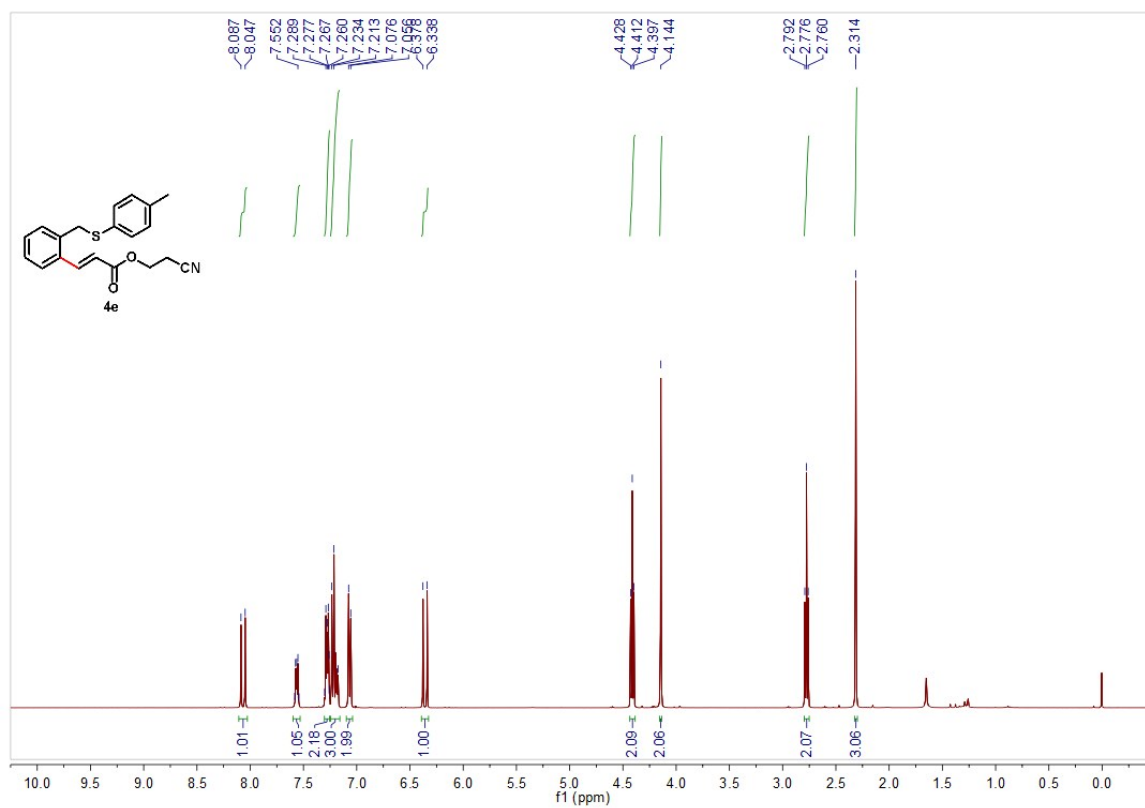

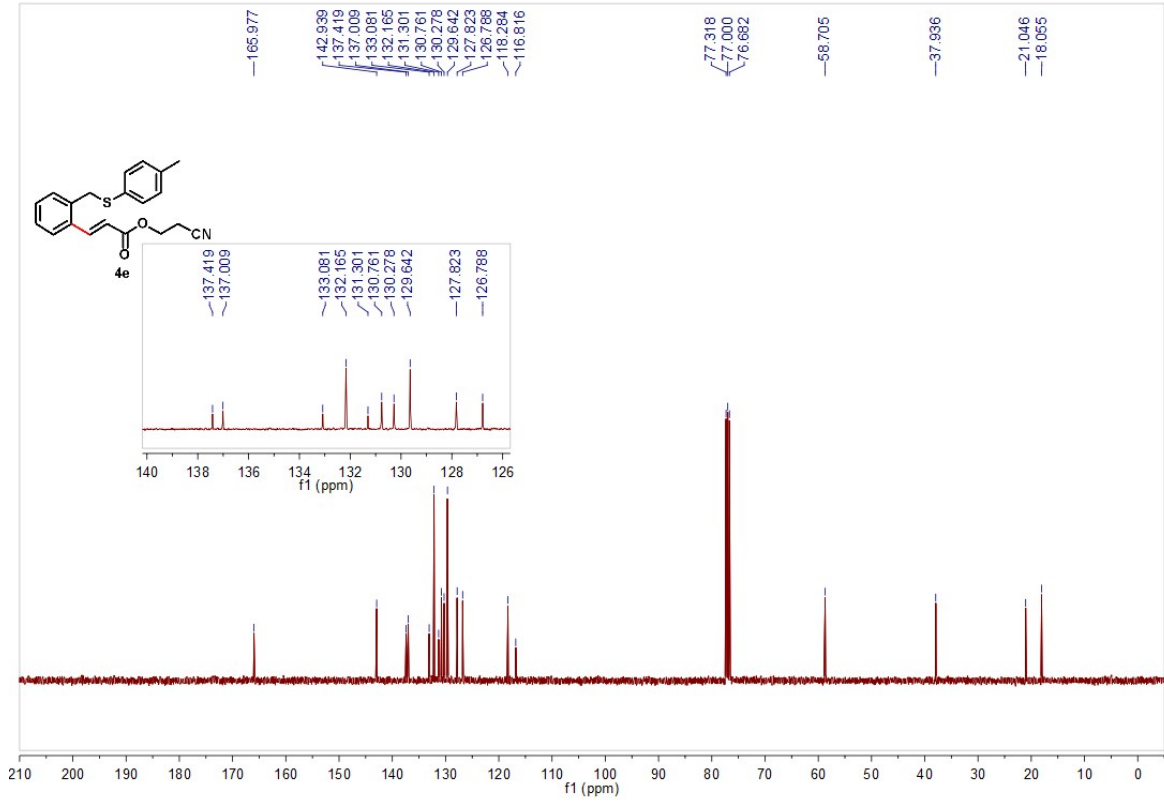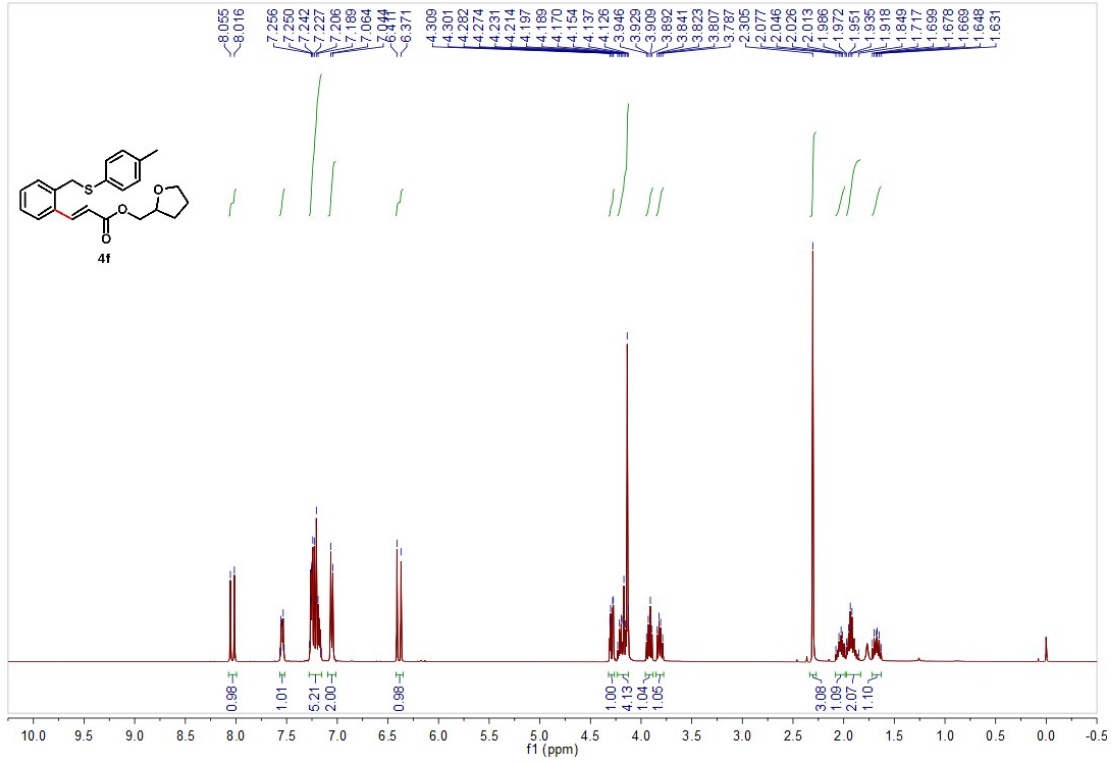

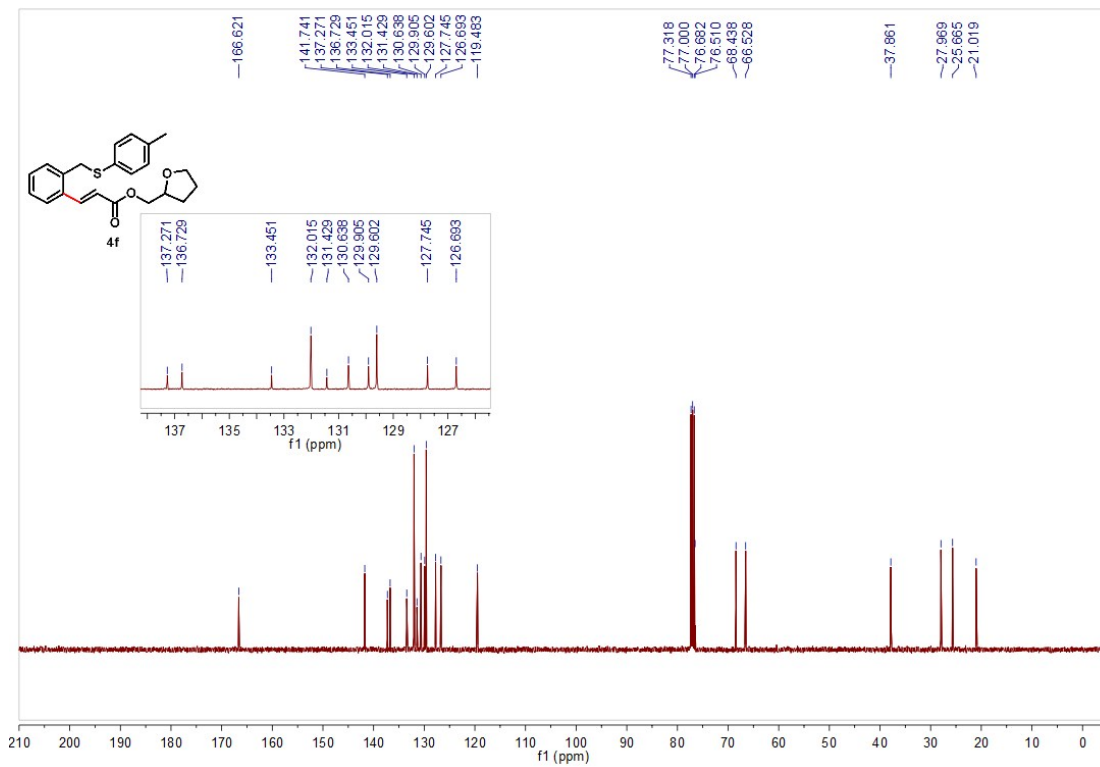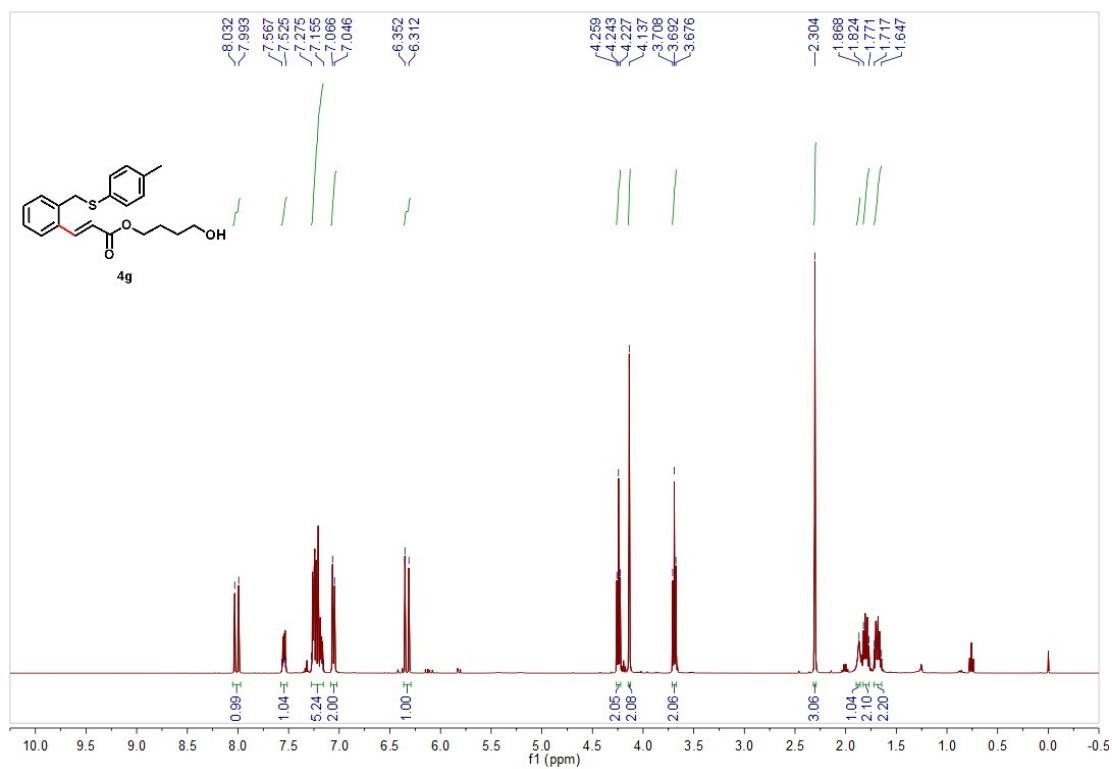

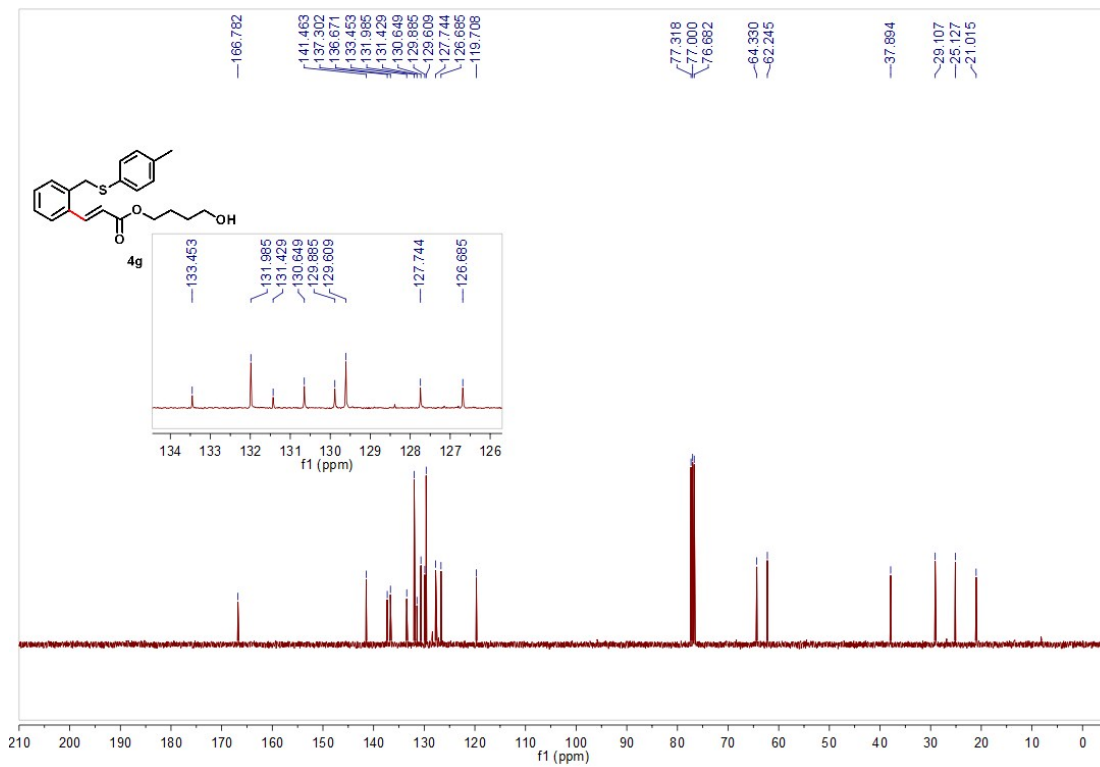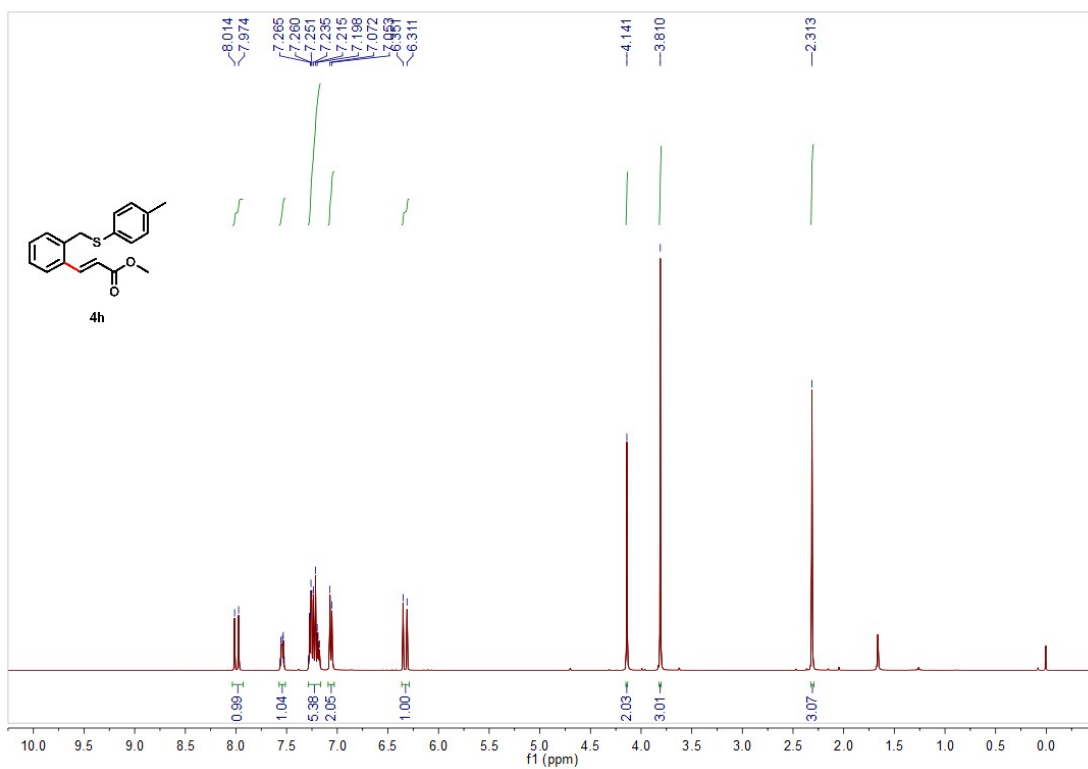

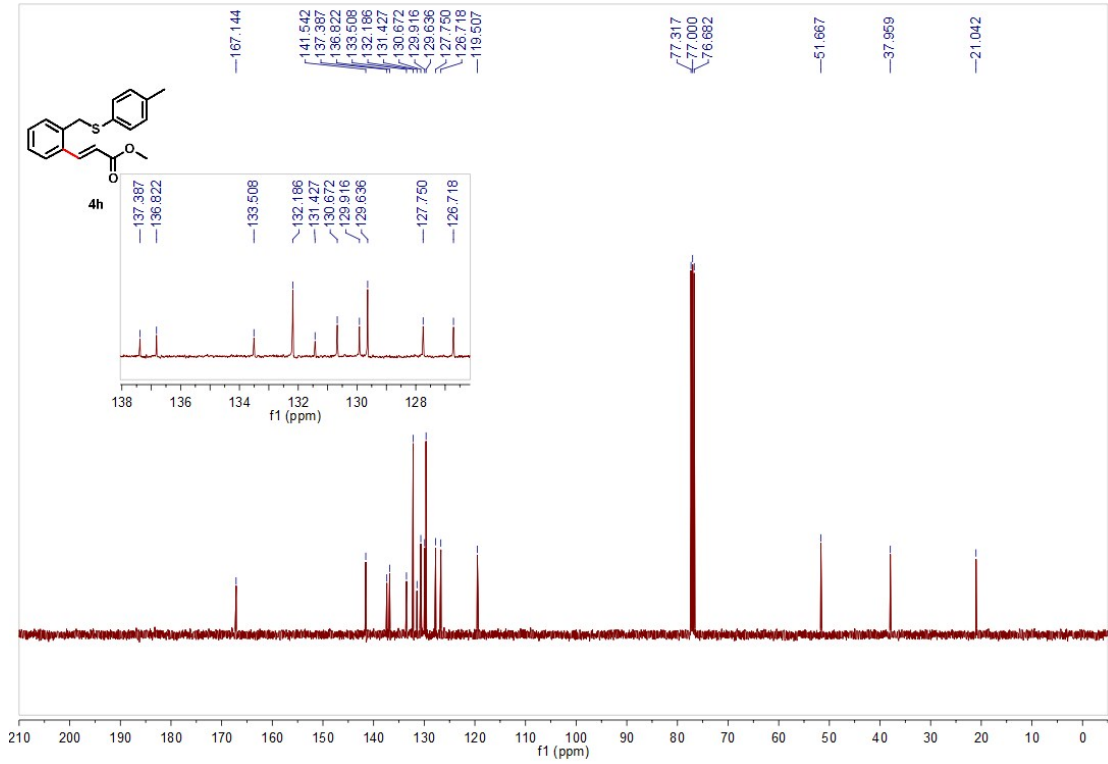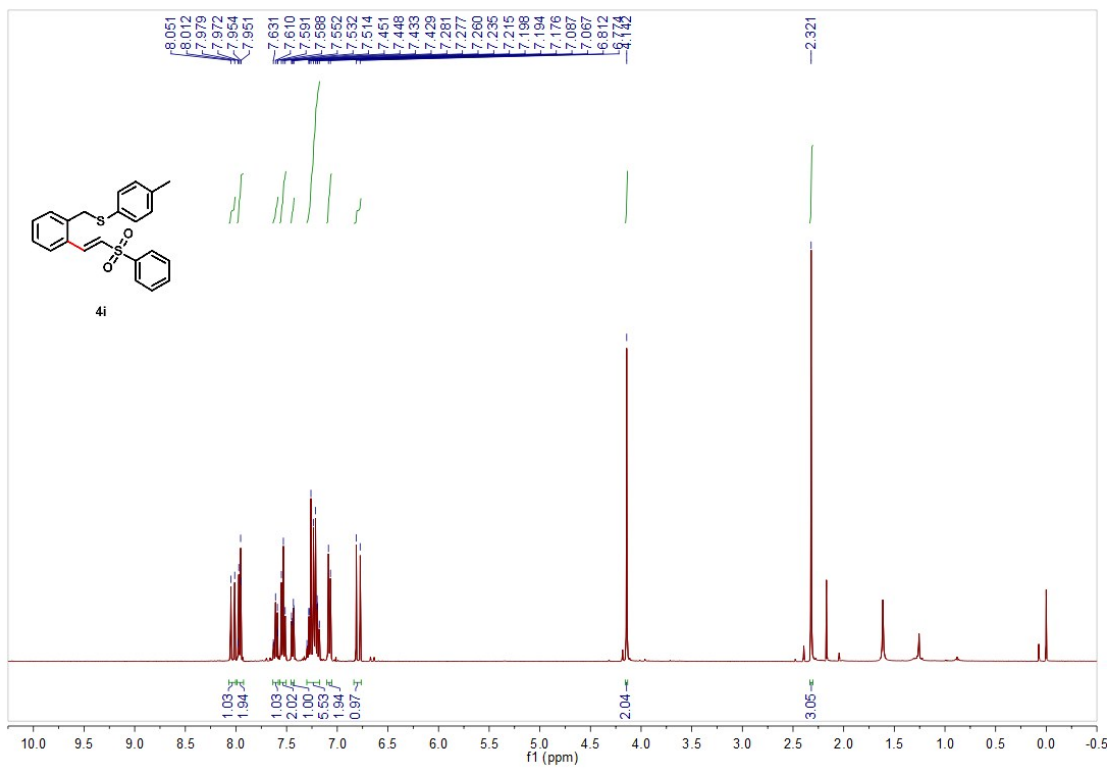

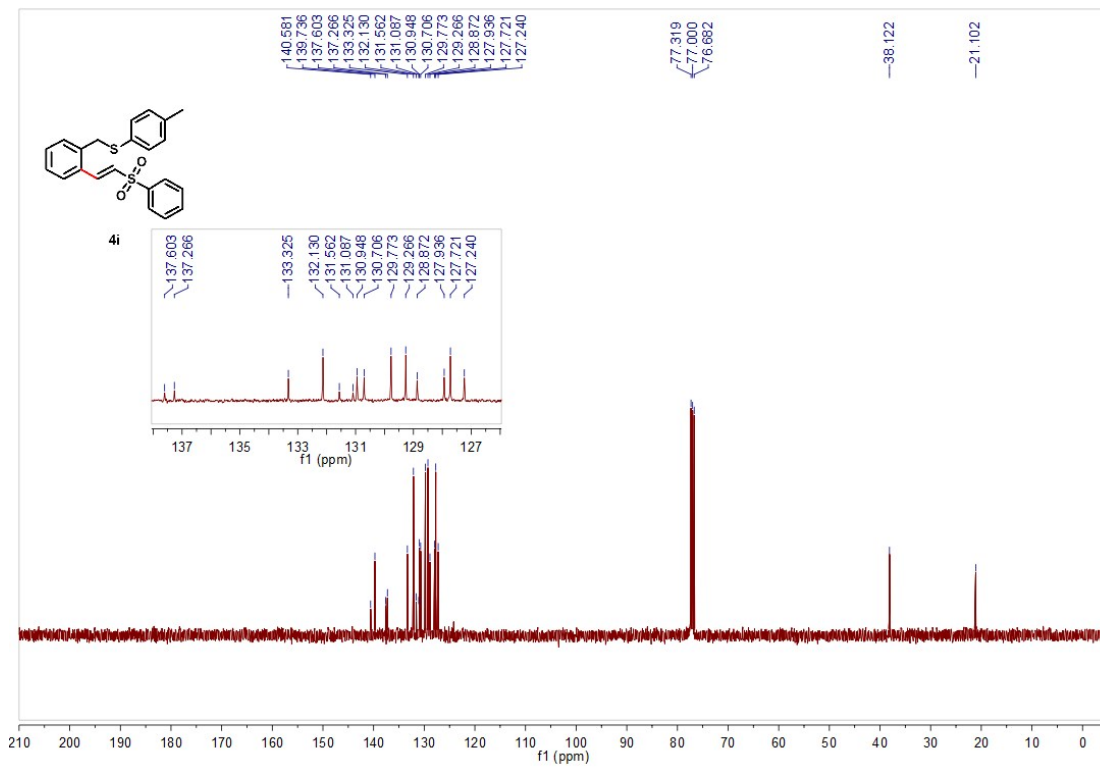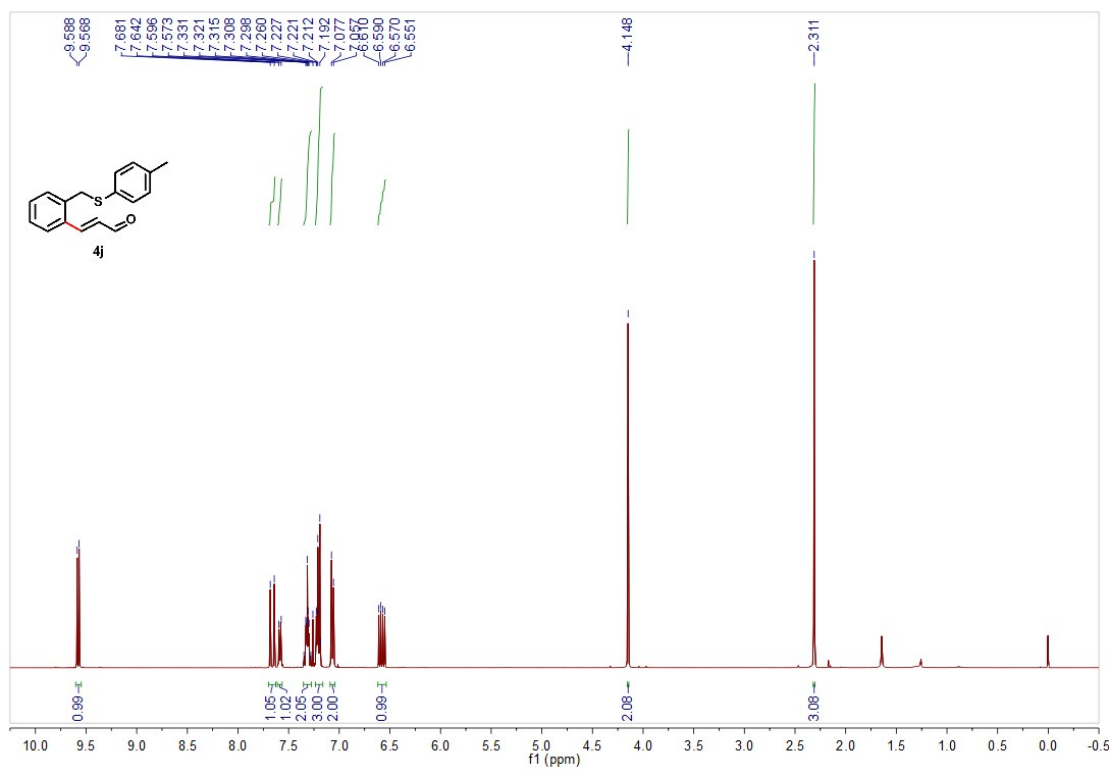



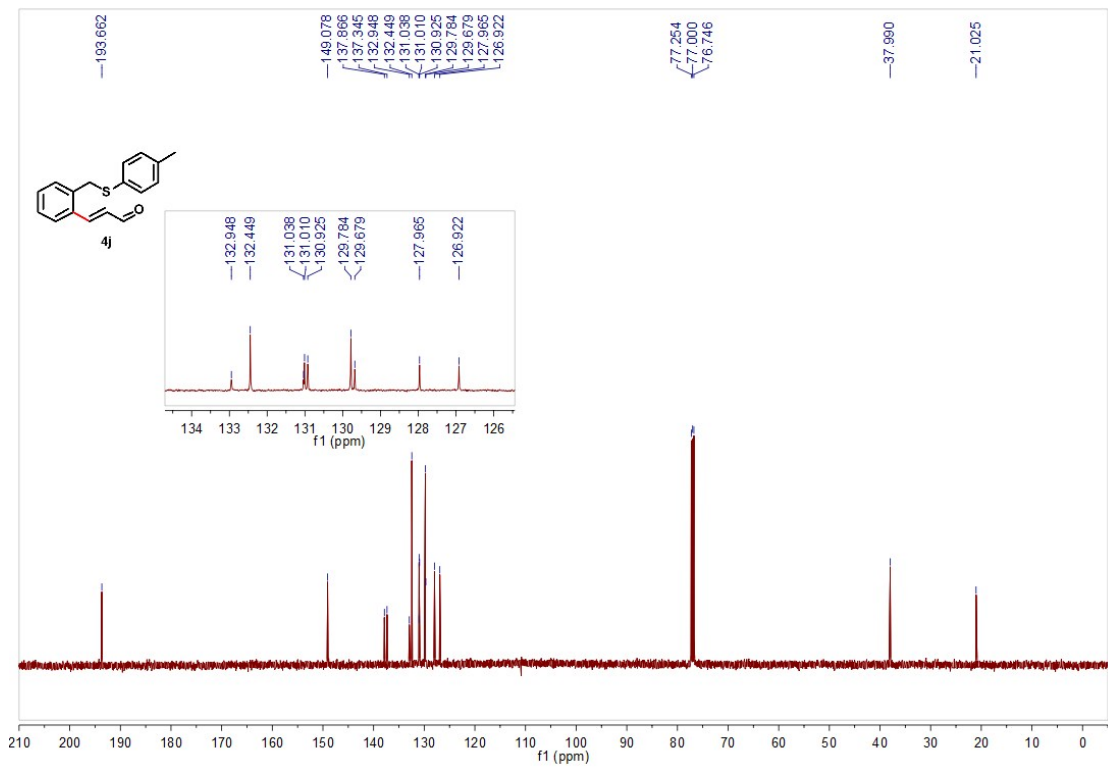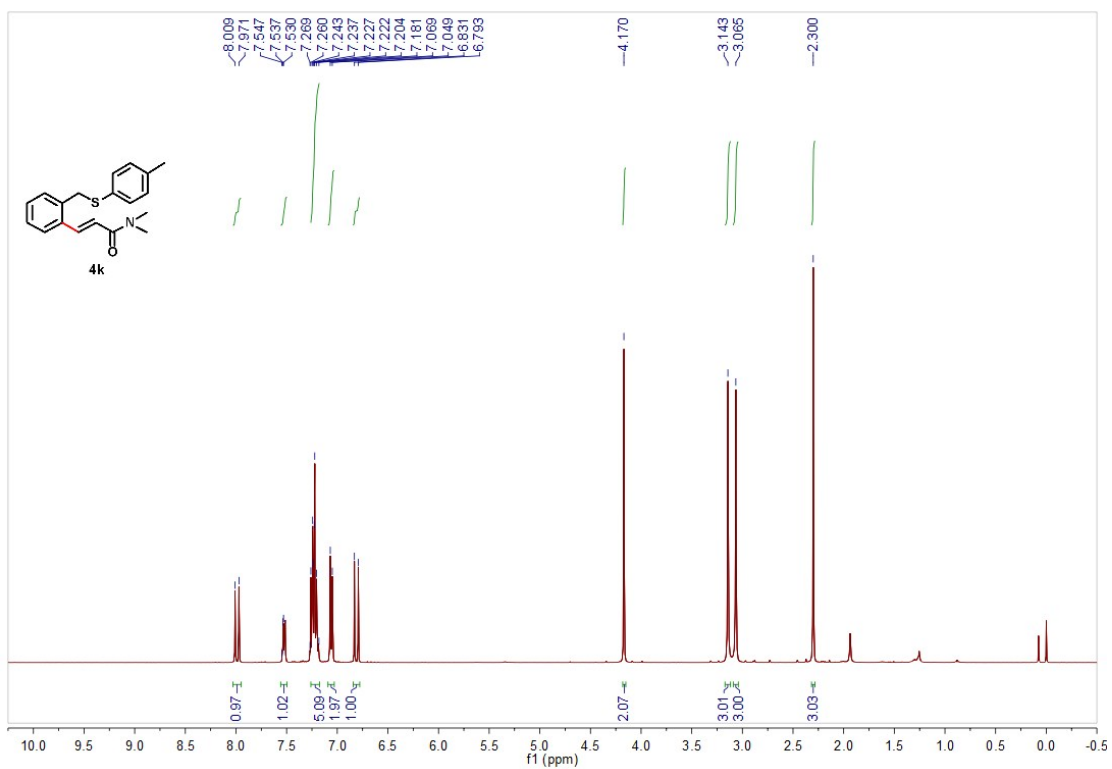

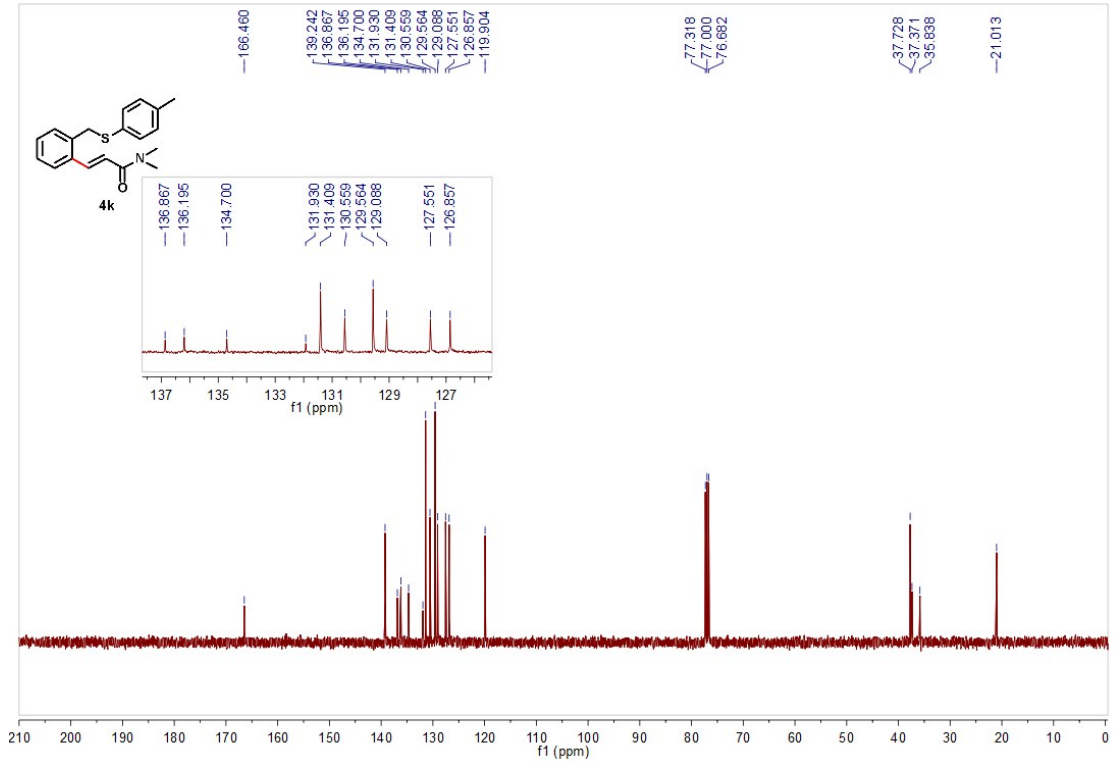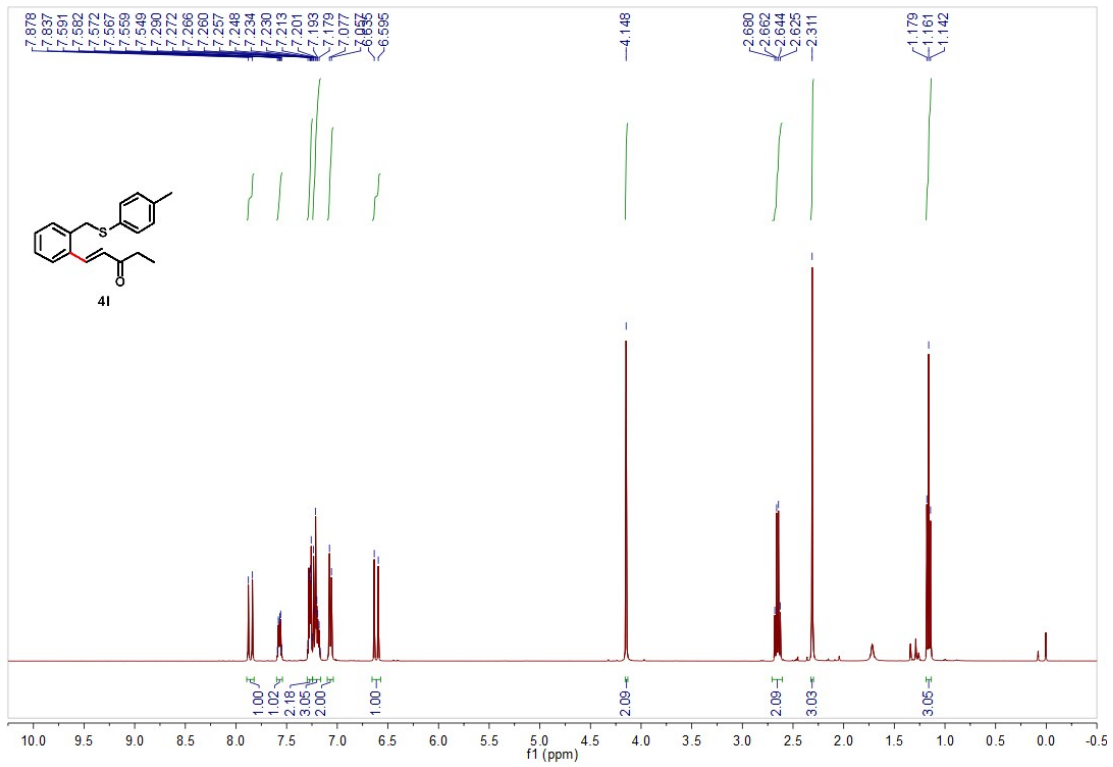

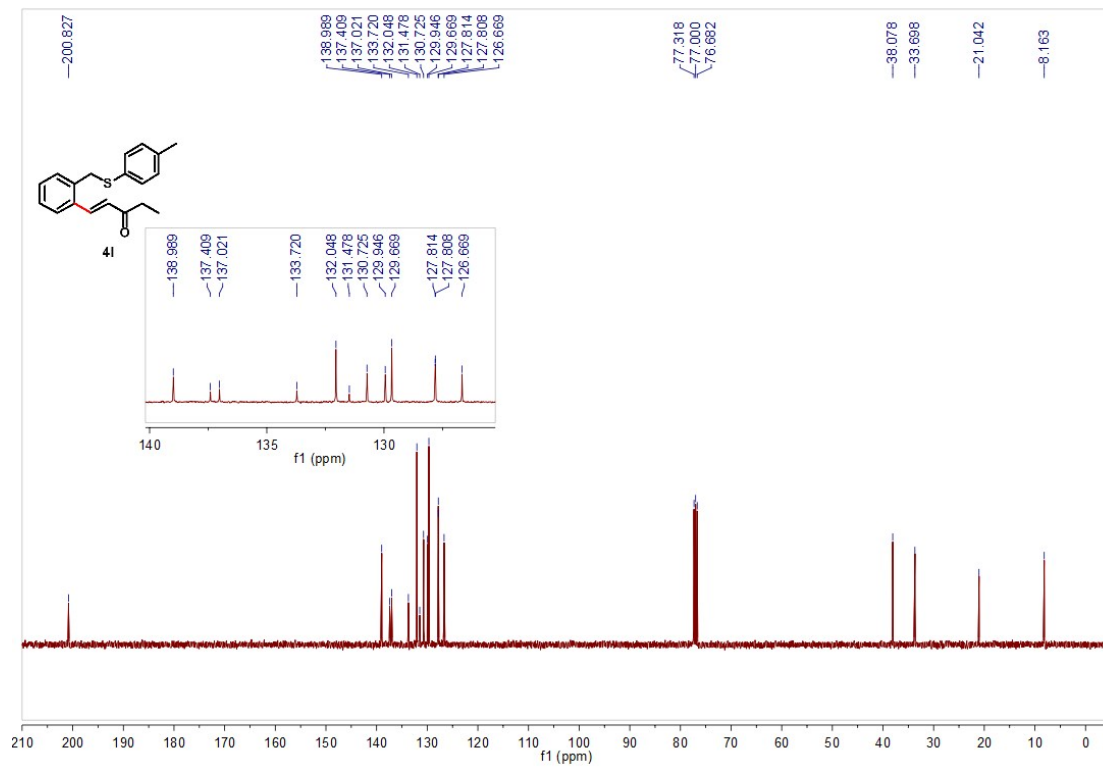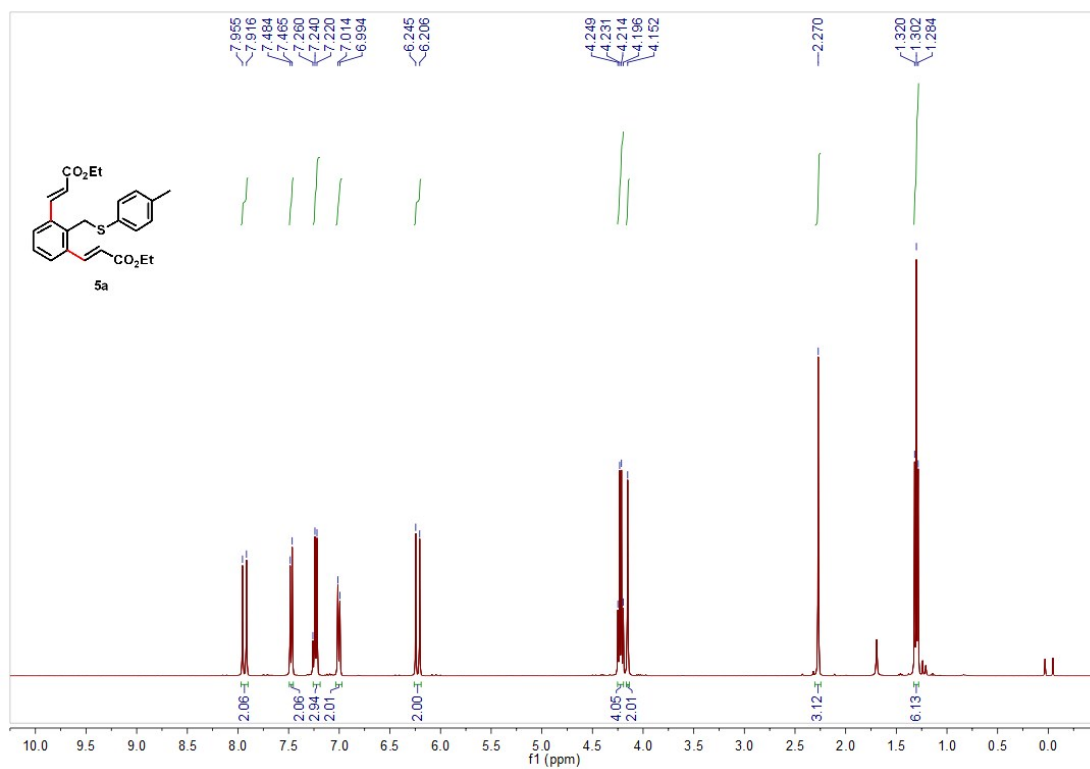

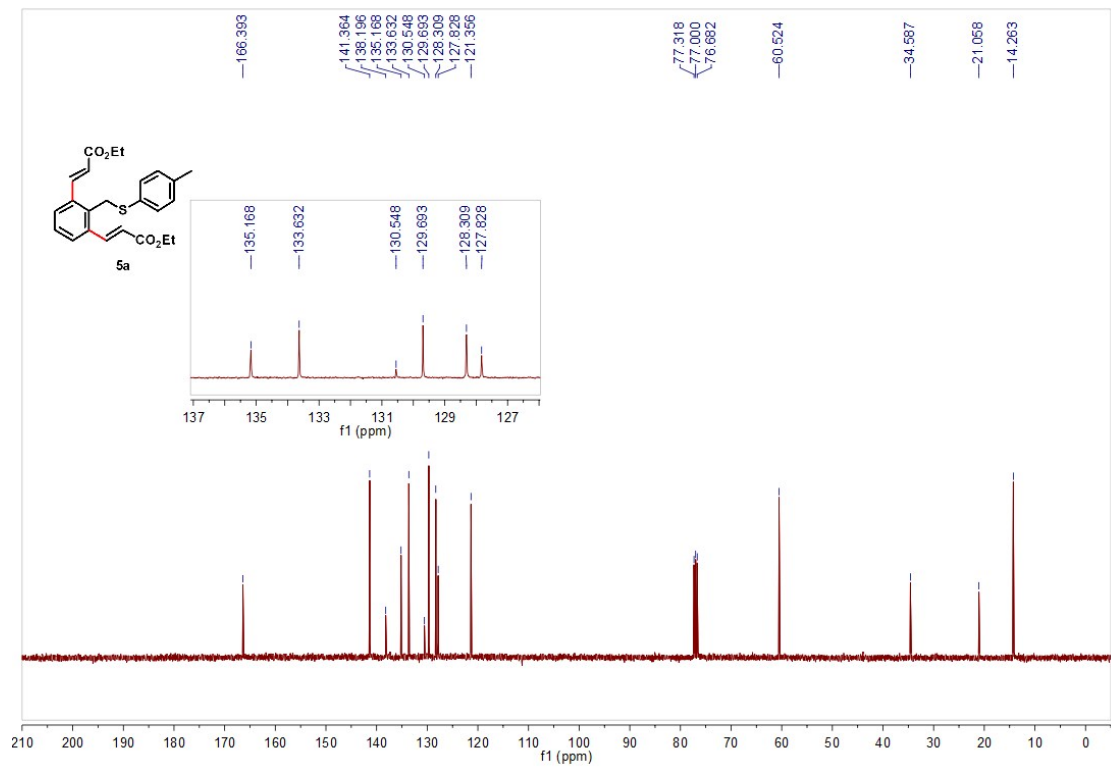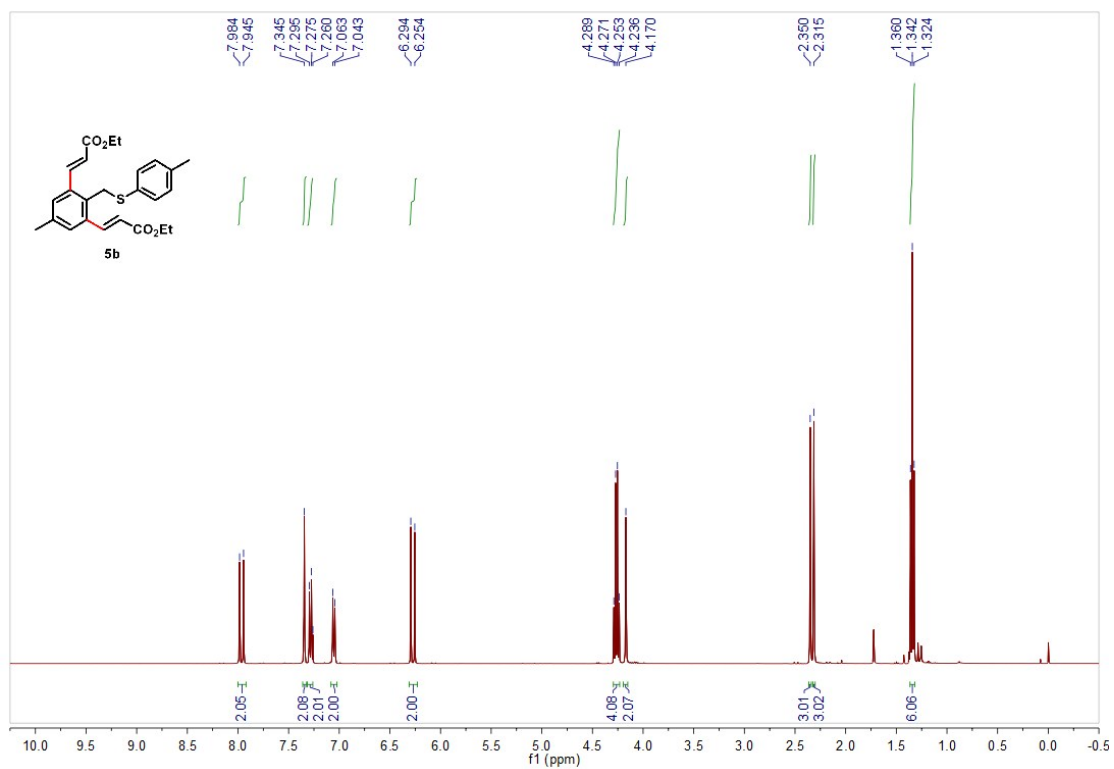

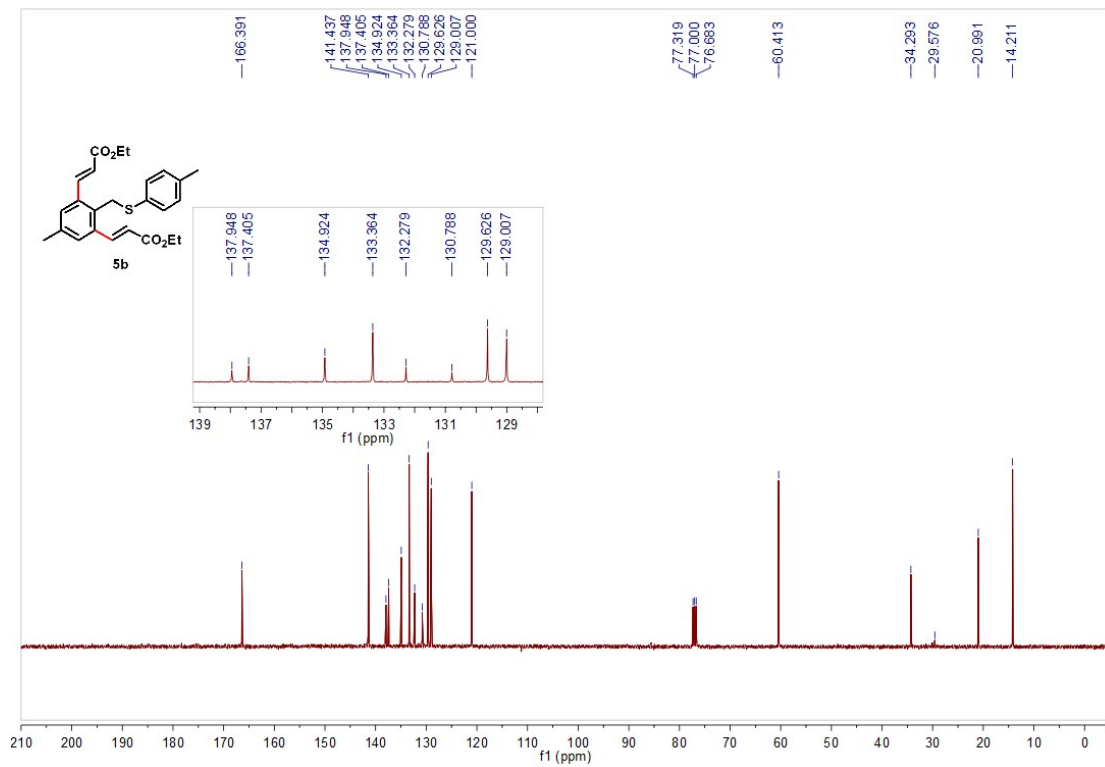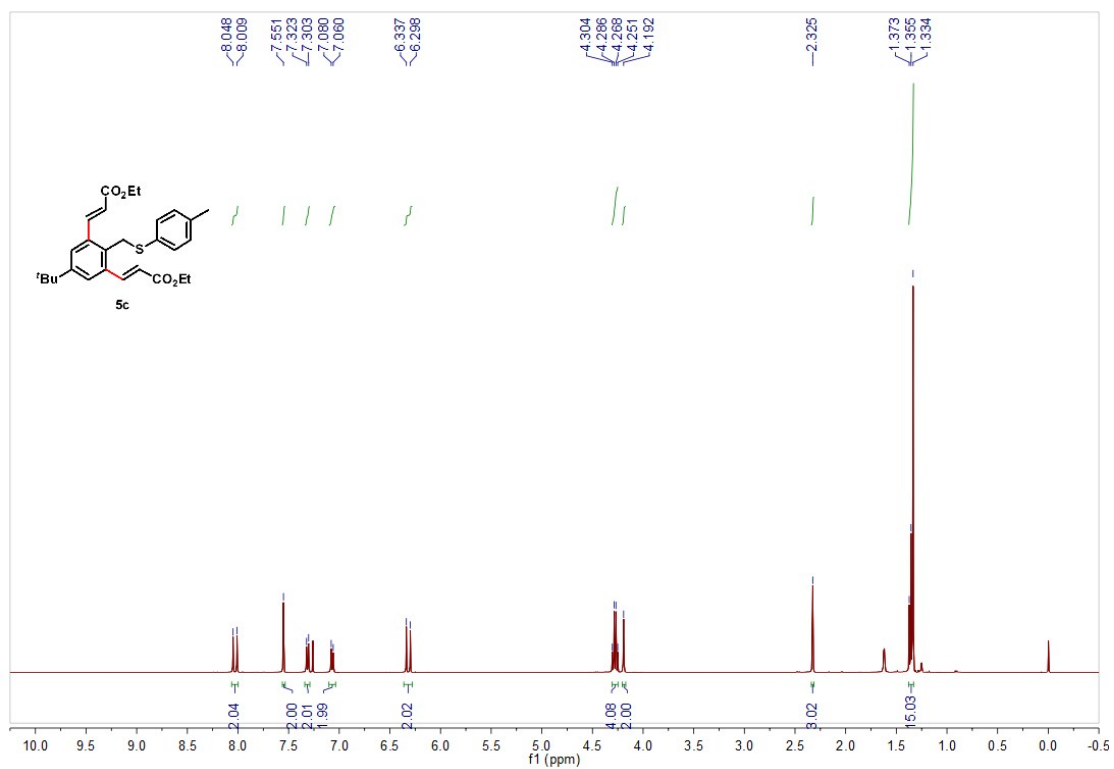

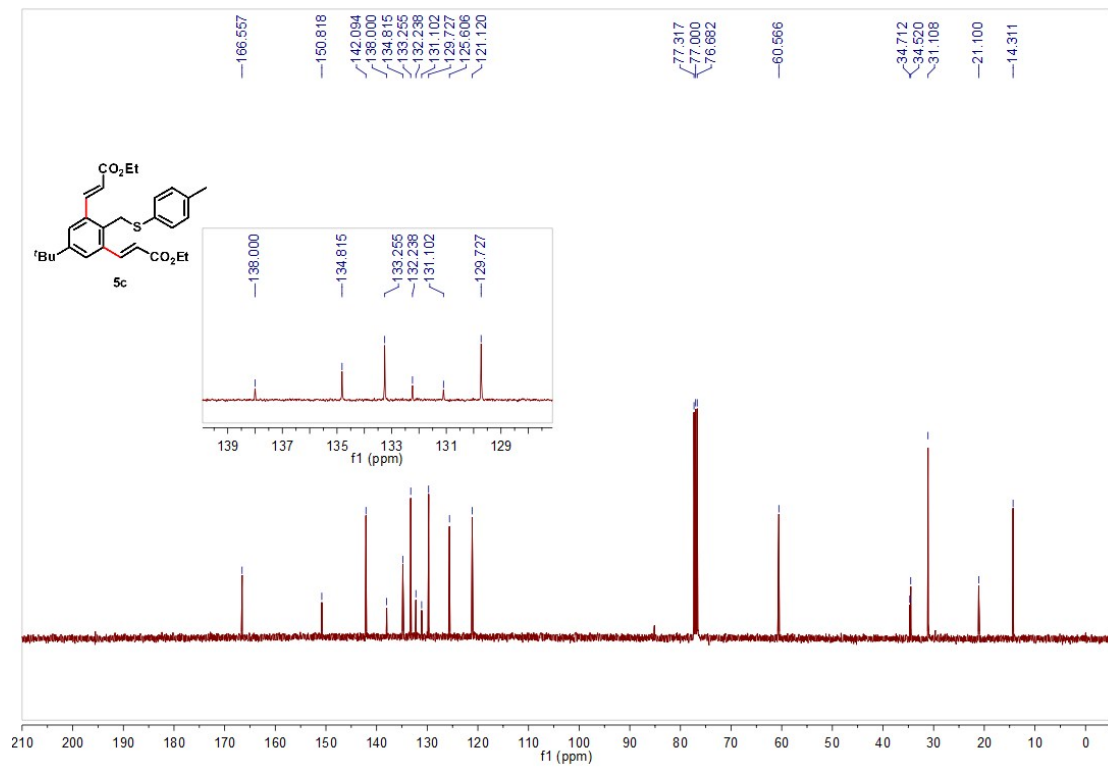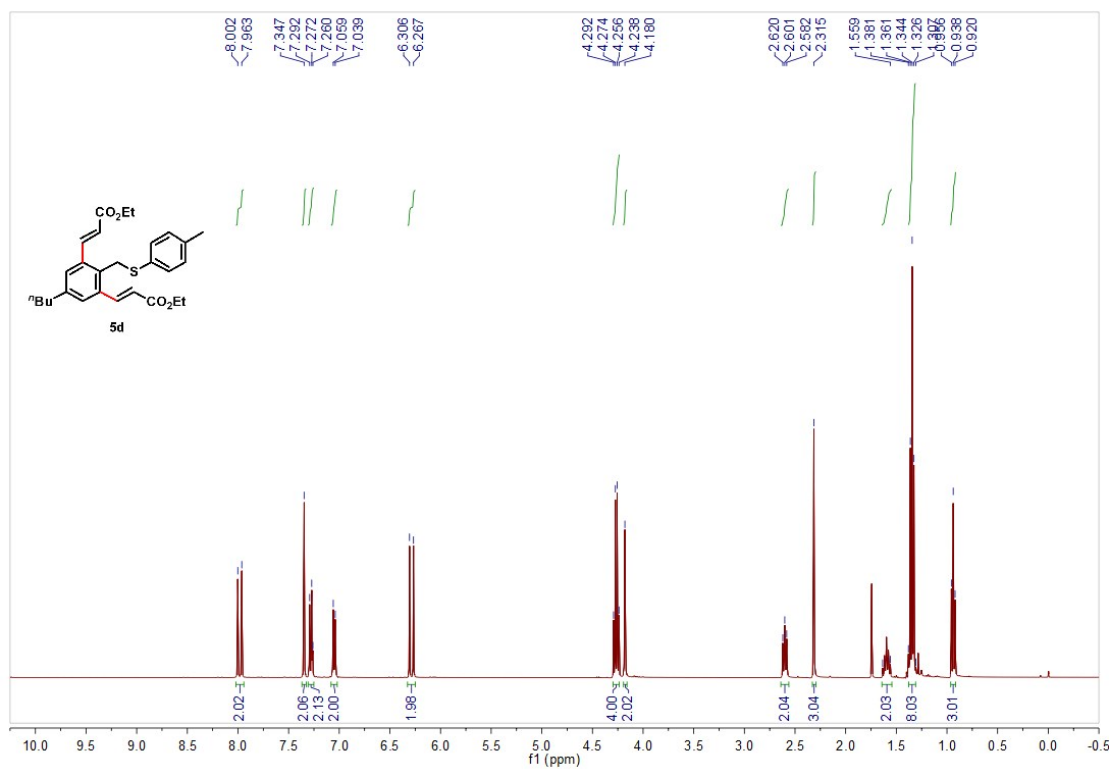

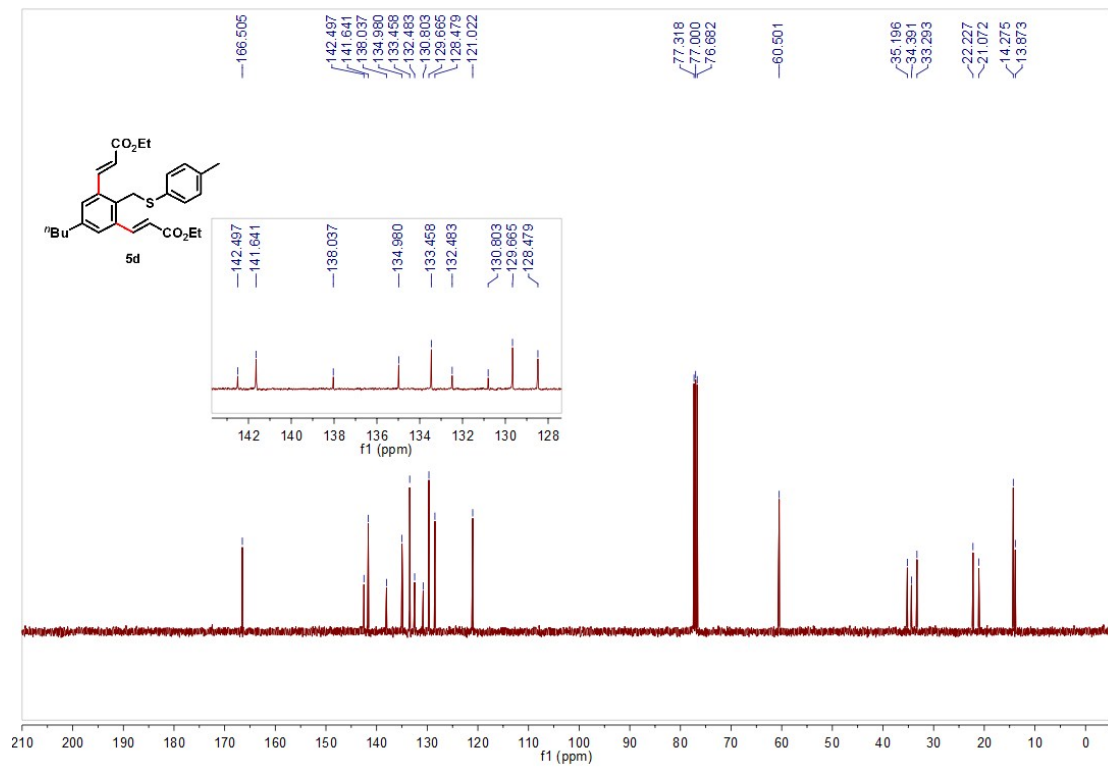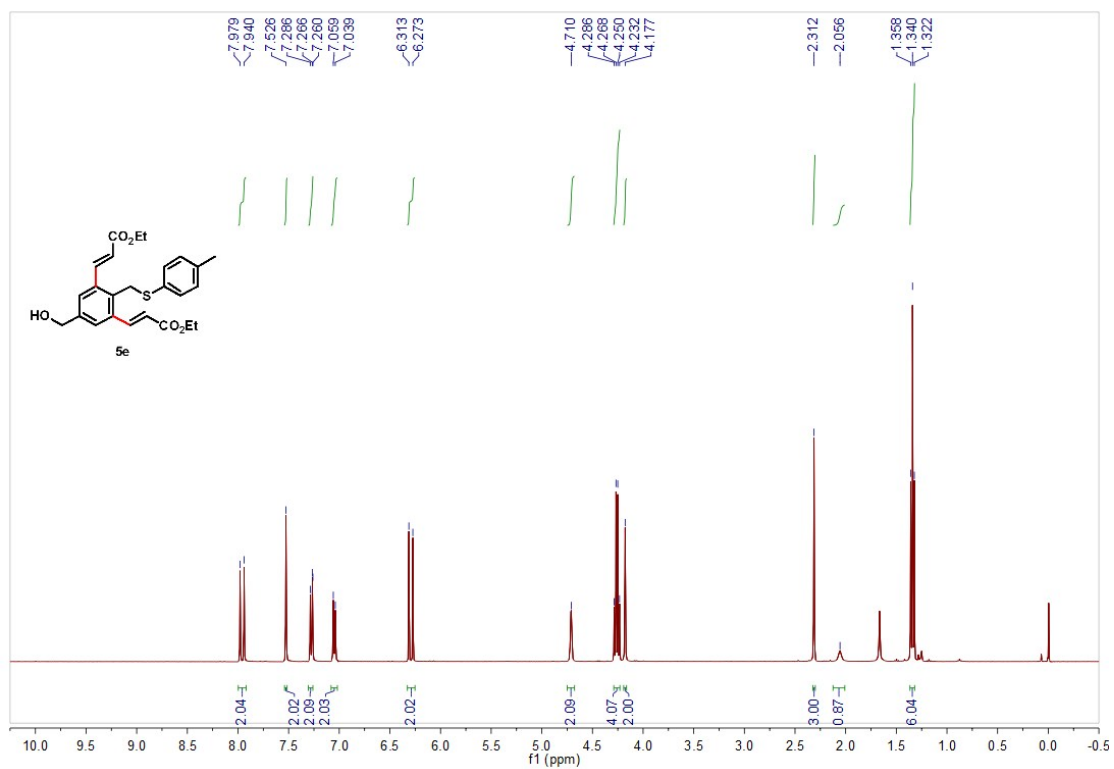

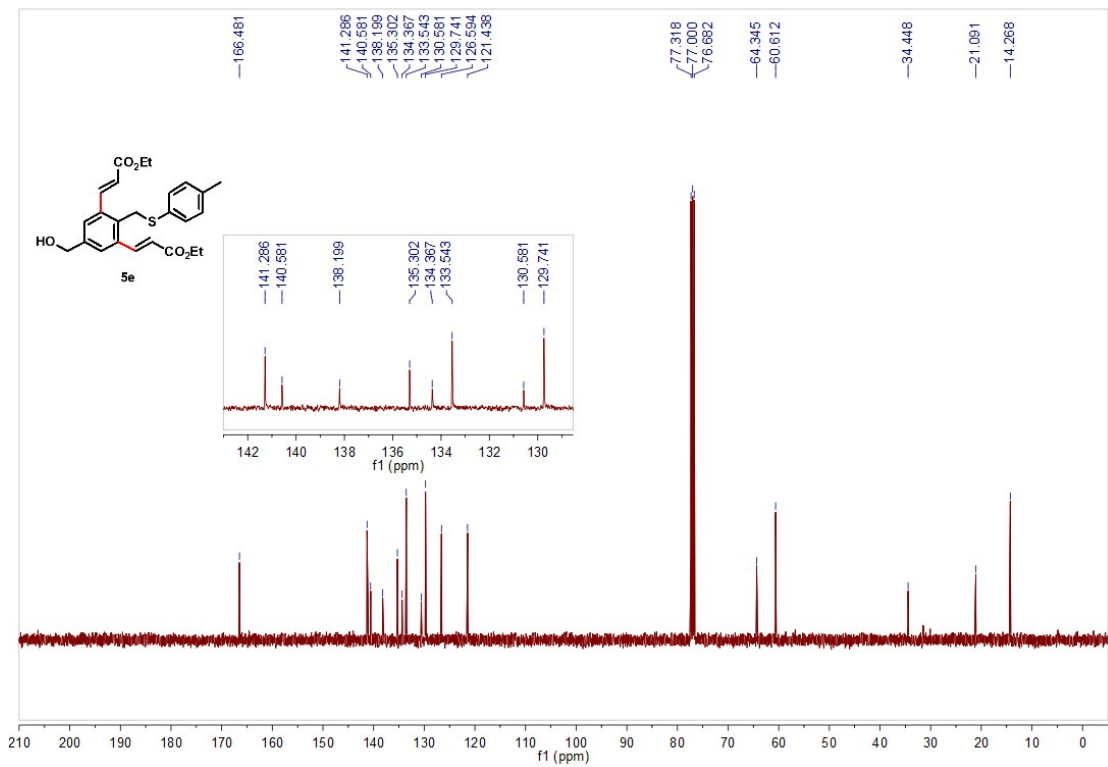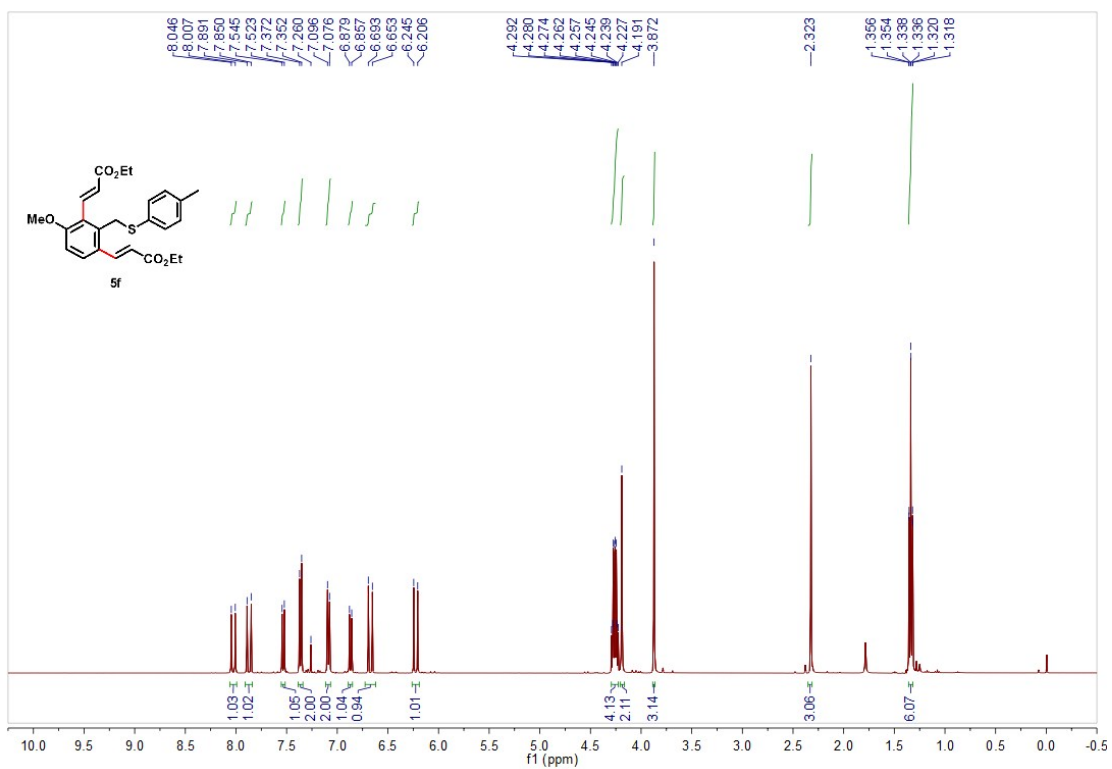



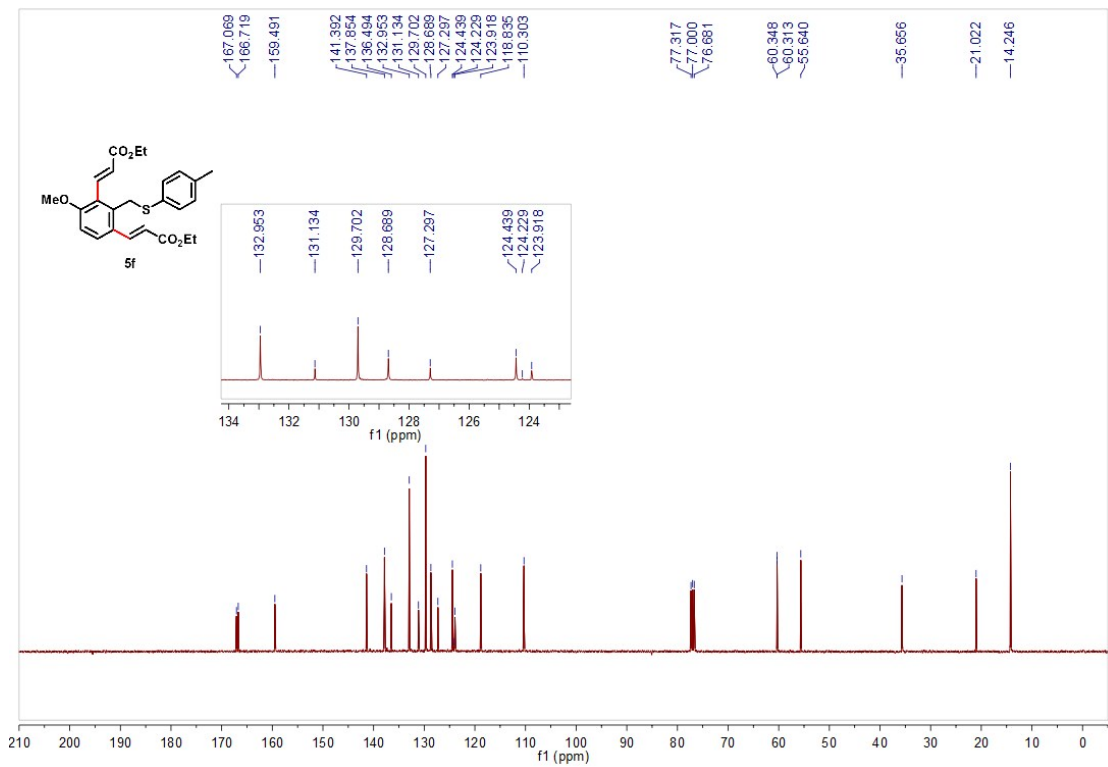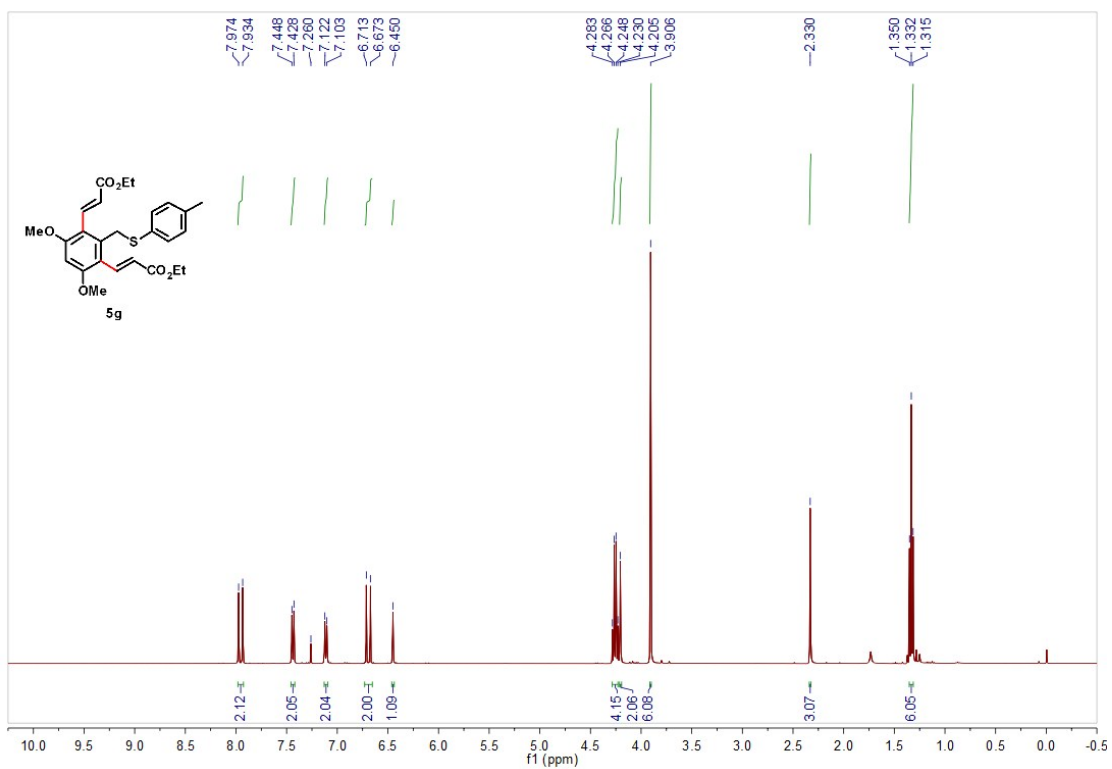

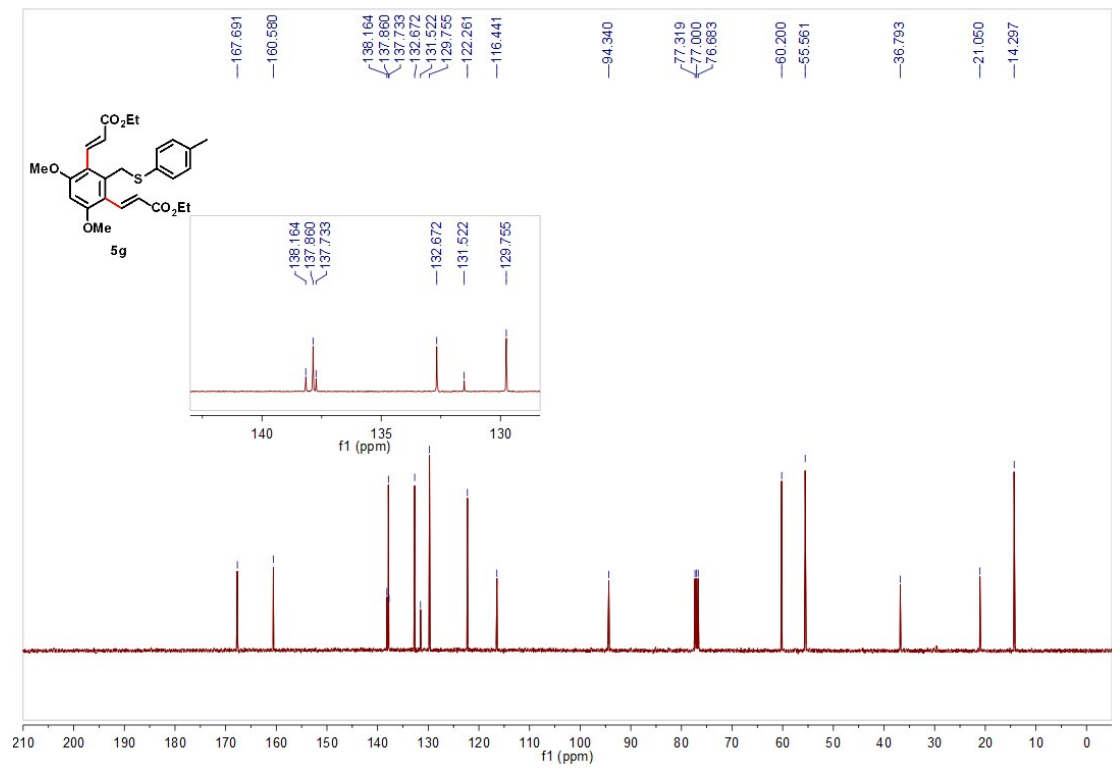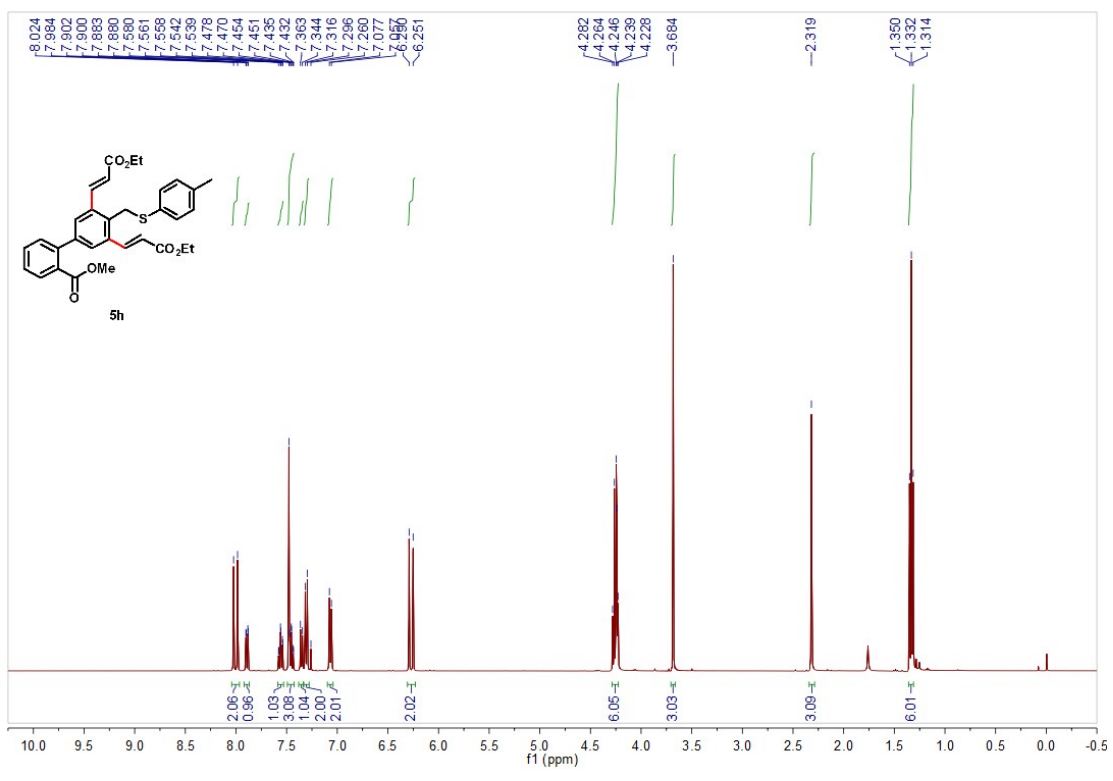

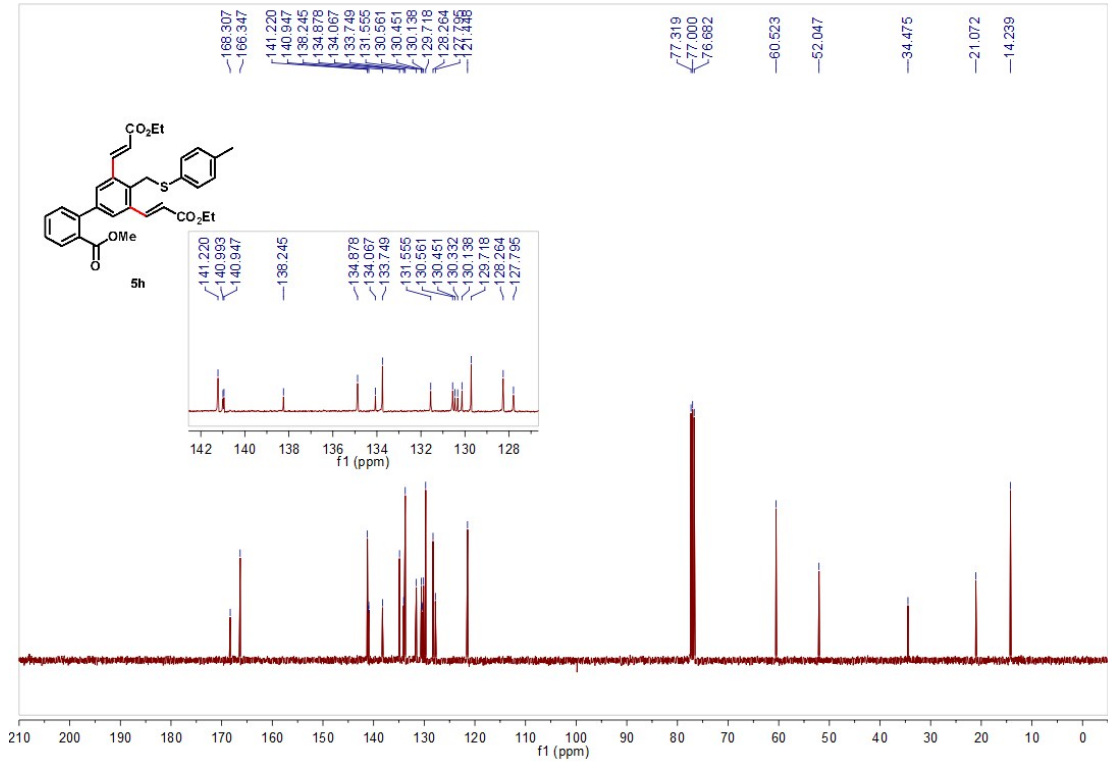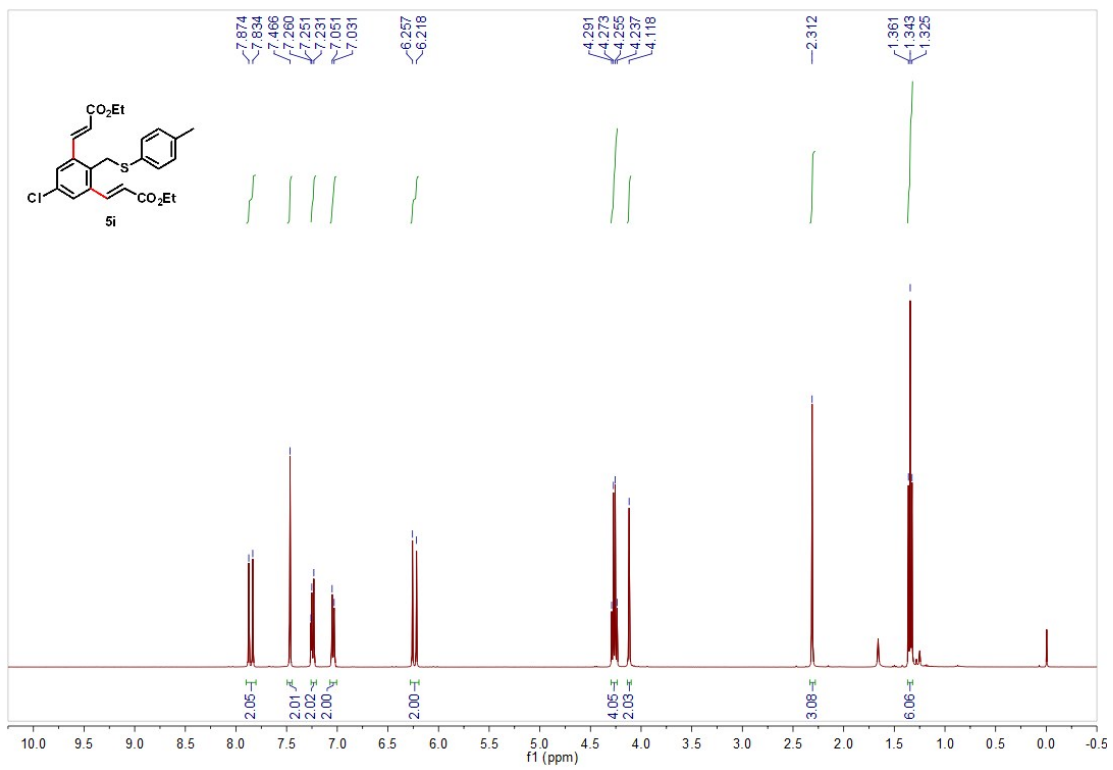

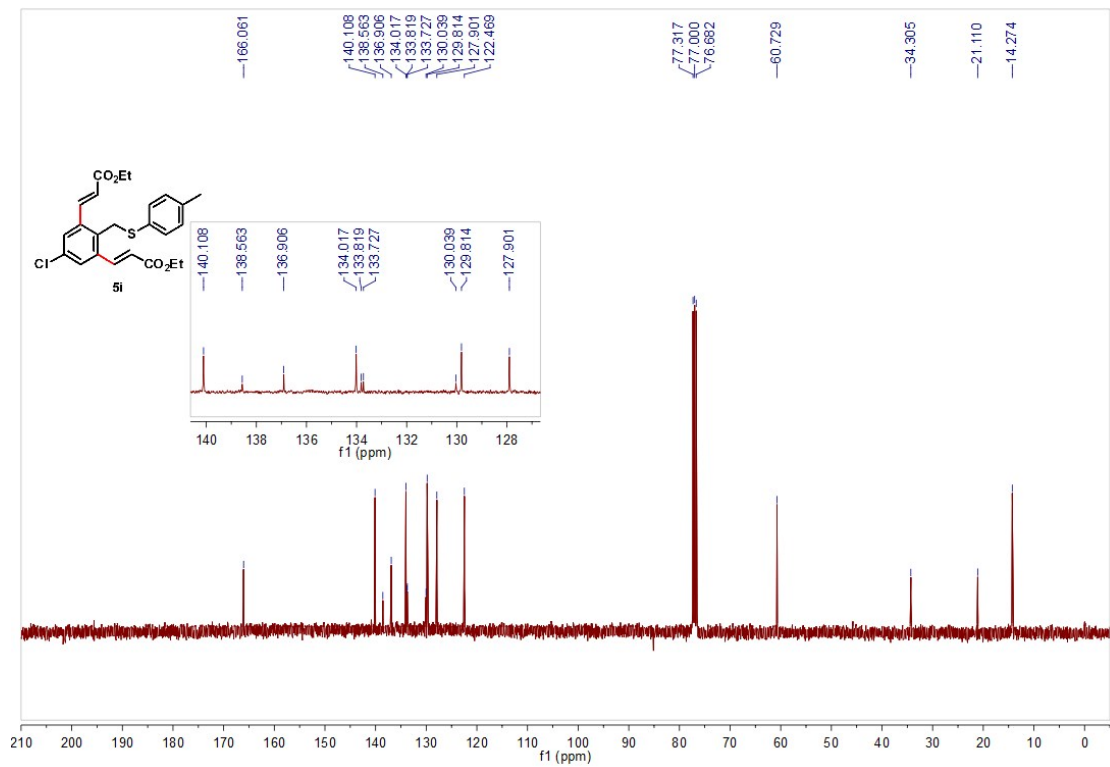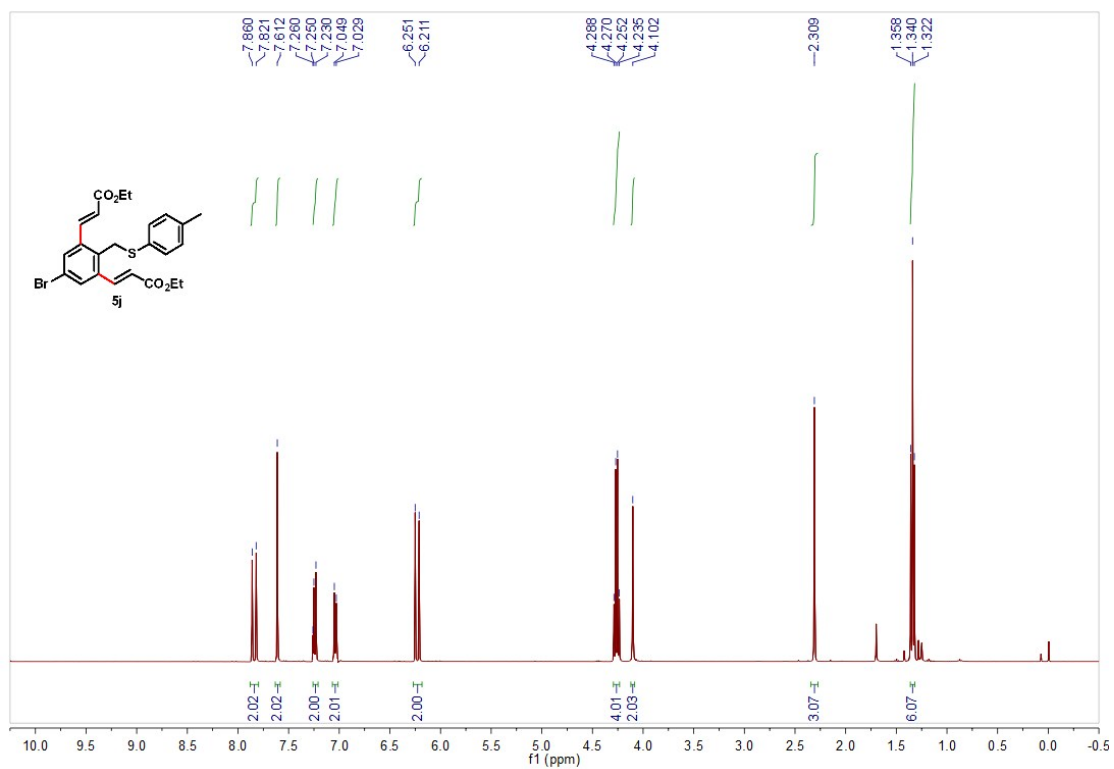

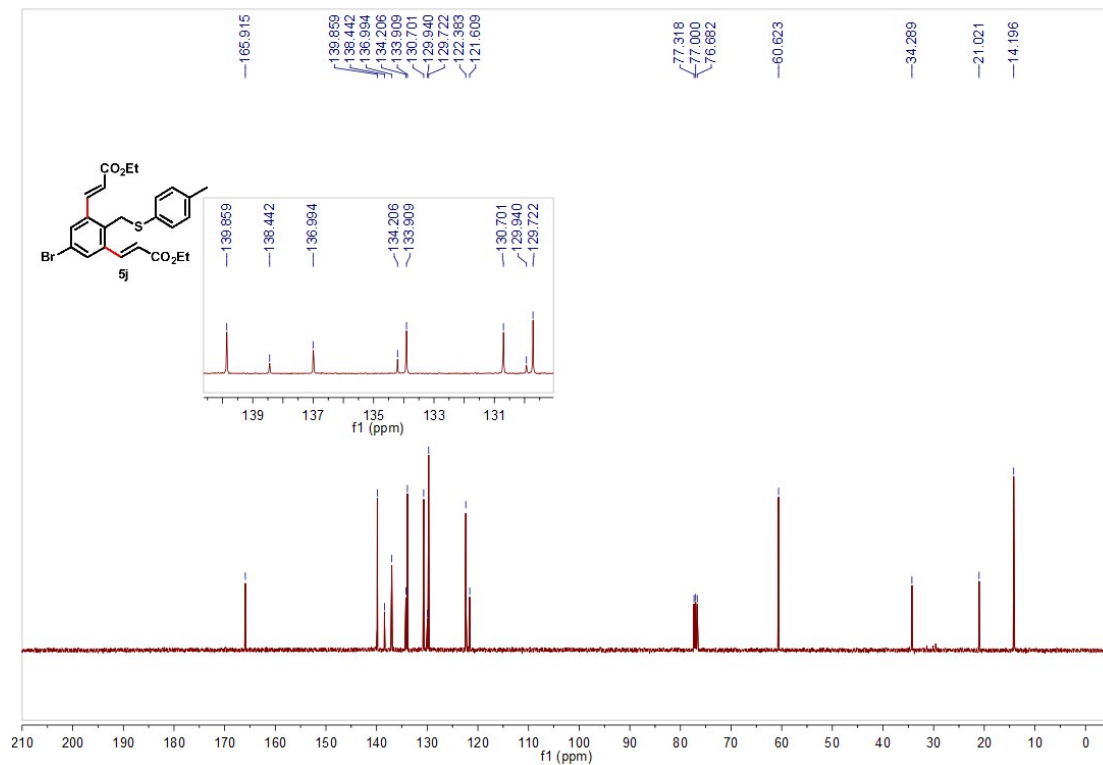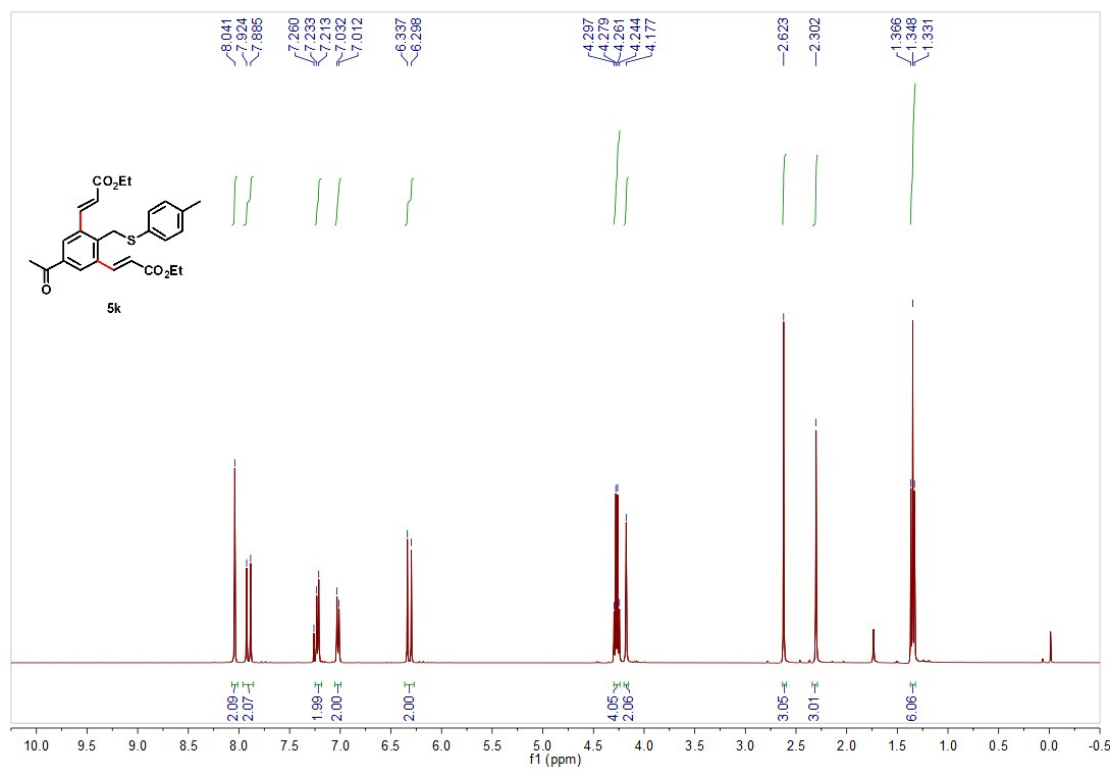

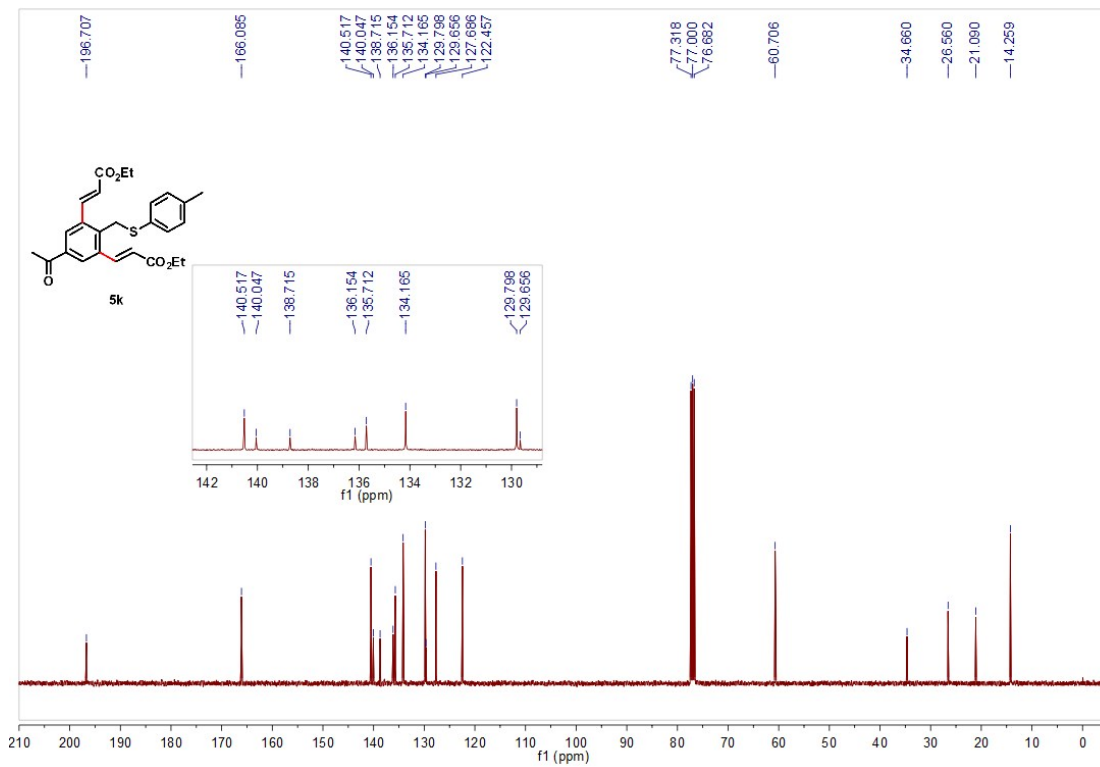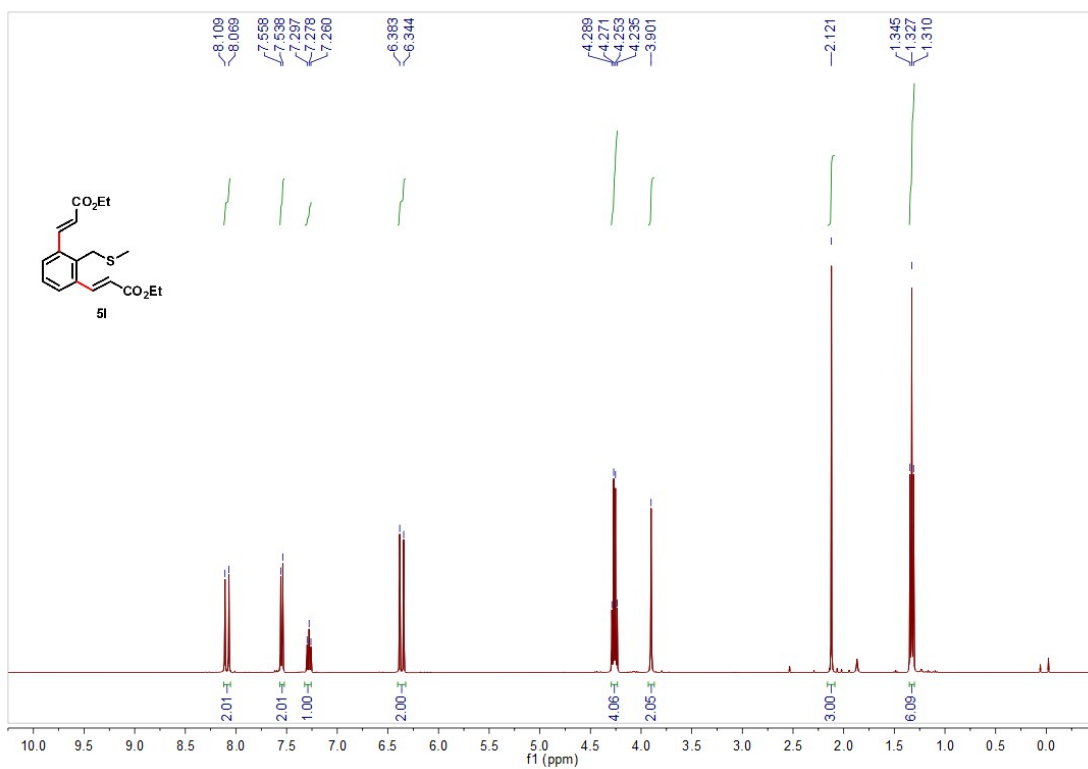

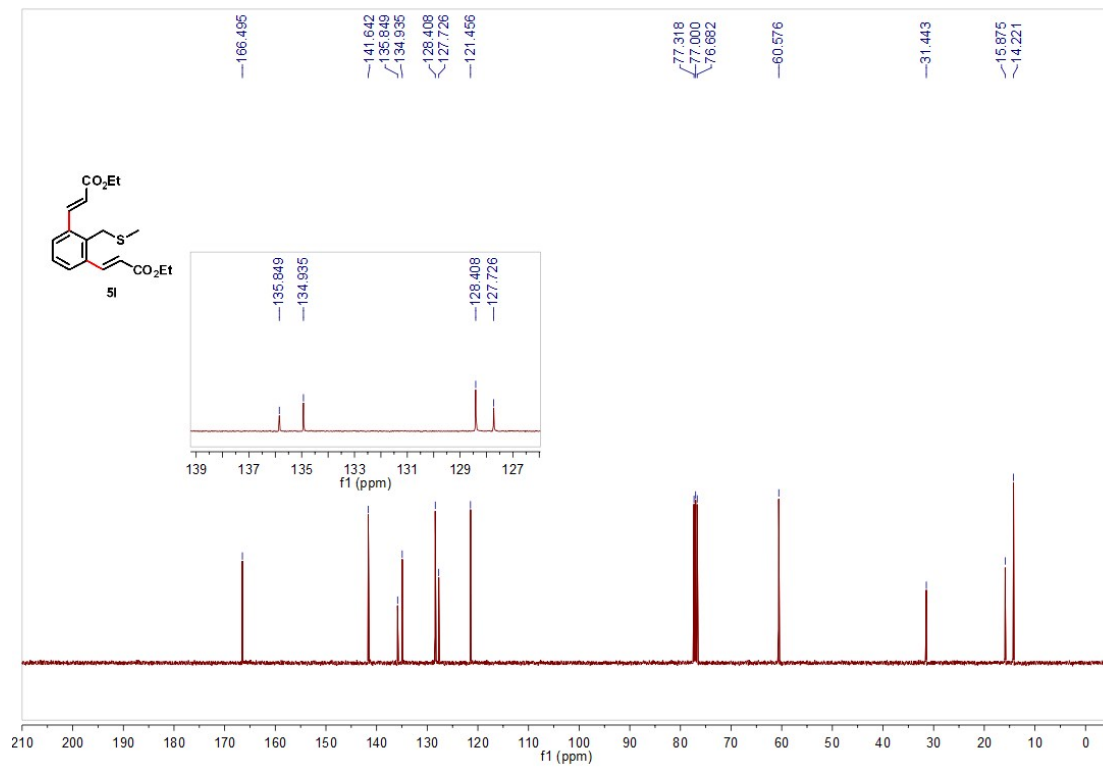

Supplement: c9ra06811b1.pdf [file c9ra06811b1.pdf]
